1  
2  
3  
4  
5  
6  
7  
8  
9  
10  
11  
12  
13  
14  
15  
16  
17  
18  
19  
20  
21  
22  
23  
24  
25

# **Systematic review: Longitudinal effects of the COVID-19 pandemic on child and adolescent mental health**

Kristin Wolf\* and Julian Schmitz

Department of Clinical Child and Adolescent Psychology,  
Wilhelm-Wundt-Institute of Psychology, University of Leipzig, Leipzig, Germany

\* Corresponding author  
E-mail: [kw40huwo@studserv.uni-leipzig.de](mailto:kw40huwo@studserv.uni-leipzig.de) (KW)  
<https://orcid.org/0000-0002-4217-3108> (KW)

## 26 **Abstract**

27 *Background:* The COVID-19 pandemic and the protection measures to contain its  
28 spread have massively changed daily lives of billions of children and adolescents worldwide.

29 *Objective:* We conducted a systematic review to investigate the global longitudinal  
30 effects of the COVID-19 pandemic on various mental health outcomes in children and  
31 adolescents over a period of one and a half years.

32 *Methods:* This review was conducted in accordance with the guidelines  
33 recommended by the Preferred Reporting Items for Systematic Reviews and Meta-Analyses  
34 (PRISMA) statement. The databases “PubMed”, “Web of Science”, and “APA PsycInfo” were  
35 searched (last access: 01/2022). Studies were included if they were peer-reviewed and  
36 published between December 2019 and December 2021, if they followed a longitudinal or  
37 repeated cross-sectional design, and if they assessed the effect of the COVID-19 pandemic  
38 or a related stressor on mental health indicators.

39 *Findings:* Of 7,451 identified studies, 69 studies ( $n \sim 130,000$ ) meeting eligibility  
40 criteria were included in a qualitative analysis. The results indicate a general trend of  
41 decreased psychological well-being, increased psychopathological distress, and heightened  
42 symptom levels (particularly of depressive and anxiety symptoms) from before to during the  
43 pandemic. Data suggests that both the intensity of protection measures and infection  
44 dynamic were positively associated with severity of psychopathology. The most reported  
45 influencing factors on the effect of the pandemic on child and adolescent mental health were  
46 age, gender, socio-economic status, previous state of mental and physical health, self-  
47 regulation abilities, parental mental health, parenting quality, family functioning, social  
48 support, isolation and loneliness, health-related worries, and consistent routines and  
49 structure.

50 *Conclusion:* Our systematic review shows that children and adolescents worldwide  
51 have experienced increased psychological distress due to the COVID-19 pandemic. These

52 results call for improvement in access to child and adolescent mental health care and the  
53 prioritisation of child and adolescent well-being in political decision making.

## 54 **Introduction**

### 55 **The COVID-19 pandemic**

56 In December 2019, the outbreak of a respiratory disease caused by the novel virus  
57 “Severe Acute Respiratory Syndrome Coronavirus type 2” (SARS-CoV-2) was reported in  
58 the People’s Republic of China [1]. The outbreak rapidly developed into an epidemic in the  
59 country by January 2020. The virus quickly spread to other regions of the world. On 11  
60 March 2020, The World Health Organization (WHO) [1] declared the spread of the virus-  
61 induced disease “COVID-19” as a global pandemic. By October 2022, more than 610 million  
62 confirmed cases of COVID-19 were reported to the WHO, of which over 6.5 million were  
63 fatal. As a result of the rapid spread of infection, drastic measures were taken worldwide to  
64 contain the spread of the virus, leading to massive restrictions on everyday life and the  
65 global economic crisis of 2020/21.

### 66 **Effects of the COVID-19 pandemic on the daily life of** 67 **children and adolescents**

68 For most children and adolescents, the current pandemic represents a first  
69 confrontation with severe threat of disease, and potential death and grief in their lives [2–4].  
70 In many the pandemic has caused anxiety and worries about infection and the health of  
71 themselves and of their family and friends [3,5]. Feelings of safety, trust, and security have  
72 been replaced by a perception of the world as a dangerous and unsafe scary place [2,6,7].  
73 According to a British survey conducted by Youngminds (2021) [7], young people reported  
74 loneliness and isolation, concerns about school work, and breakdown of routines to be the  
75 most stressful experiences in the pandemic.

76 The global economic crisis caused by pandemic-related restrictions has led to a  
77 sharp rise in unemployment and poverty around the world [8,9]. Especially in low-income

78 countries, these economic hardships forced many children into exploitative and dangerous  
79 work to support their families [8].

80 Further, since the start of the pandemic, essential health services have been  
81 disrupted in 90% of countries worldwide [10]. This means that children's and adolescents'  
82 access to routine immunizations and examinations has been impaired, leading to increased  
83 morbidity and mortality [9,10]. Many psychiatric and psychosomatic in- and outpatient clinics  
84 were partially or fully closed for multiple weeks. The work of child protection services has  
85 been impaired in at least 104 countries, making it hard to prevent, report, detect, and  
86 respond appropriately to cases of child maltreatment [11,12].

87 One of the biggest and most far-reaching changes to the lives of children and  
88 adolescents in the pandemic has been the closure of schools and childcare facilities to  
89 prevent the spread of the virus. These closures have been globally regarded as necessary  
90 due to the impracticability of distancing practices in school because of limited space,  
91 frequent and varied interactions among large groups of pupils, and difficulties for (especially  
92 younger) children to follow hygiene and distancing guidelines [13]. According to the World  
93 Health Organization (2022) [10], the closures of schools have led to the largest disruption of  
94 education systems in history, affecting nearly 1.6 billion students in more than 190 countries.

95 Regarding the closer social environment of children and adolescents, it is likely that  
96 social relationships of children and adolescents have suffered during the pandemic due to  
97 limited and discouraged socialising and imposed isolation from friends and extended family  
98 members [11,14].

99 Not only children and adolescents but entire family systems have experienced  
100 disrupted daily activities and pandemic-related stress. Therefore, inner-familial tension has  
101 increased and family dynamics in many households have changed [6,9].

102 Taken together, the COVID-19 pandemic and related containment measures have  
103 massively changed the daily lives of children and adolescents. For many, normal  
104 development has been impaired, and stress and strain have increased while the availability  
105 of many coping, support, and protection resources has been limited.

## 106 **Research on the effect of the COVID-19 pandemic on child** 107 **and adolescent mental health**

108 Since the beginning of the COVID-19 pandemic in spring 2020 a lot of research  
109 investigating its mental health consequences has been conducted. Some reviews and meta-  
110 analyses have already tried to summarise this enormous body of research.

111 Santomauro et al. (2021) [15] estimated that there has been an increase of 27.6% in  
112 depression and of 25.6% in anxiety disorders in the general population due to the pandemic.  
113 In addition, a number of reviews and meta-analyses which assessed the psychological  
114 consequences of the COVID-19 pandemic on different age groups have found a strong  
115 increase of mental health problems in children and adolescents [6,16–22].

116 However, it must be taken into consideration that previous reviews and meta-  
117 analyses included mostly cross-sectional studies which makes it difficult to distinguish  
118 between pre-existing levels of psychopathology and the pandemic-specific consequences  
119 and can lead to an overestimation of effects.

120 Therefore, longitudinal studies seem more appropriate for investigating these effects,  
121 as they allow a direct detection of developmental pathways across time. Unfortunately, the  
122 few meta-analyses which use longitudinal assessments of mental health symptoms focus on  
123 the general population and not on children and adolescents in particular [23–25].

### 124 **The current review**

125 The current study attempts to fill in these gaps in research by reviewing only  
126 longitudinal and repeated cross-sectional studies on the mental health consequences of the  
127 COVID-19 pandemic on child and adolescent mental health published over a course of two  
128 years. The objectives are to isolate the pandemic's effects on a broad spectrum of mental  
129 health outcomes, to learn about factors influencing these effects, to investigate long-term  
130 psychological consequences over the course of the pandemic, and to create a large sample  
131 of studies conducted in many different countries to obtain a higher generalizability of

132 findings. This study might also be beneficial to the disaster theory and research as the  
133 COVID-19 pandemic significantly differs from disasters frequently studied until now  
134 regarding duration, intensity, and differential effects.

135 The following research questions are investigated in this paper:

136 1) How did the frequency of psychological distress in the general population of children  
137 and adolescents change from before the COVID-19 pandemic to during the  
138 pandemic?

139 2) How did the frequency of psychological distress in the general population of children  
140 and adolescents develop over the course of the pandemic?

141 3) What are moderating and mediating factors that influence the potential effects of the  
142 COVID-19 pandemic on child and adolescent mental health?

143 Psychological distress serves as an umbrella term comprising both global measures  
144 of mental health and psychopathology (i.e., quality of life, well-being, life satisfaction,  
145 psychological stress, and affect) and symptoms of common mental health disorders in  
146 childhood and adolescence. These involve internalising symptoms (including depression and  
147 anxiety), externalising symptoms (including hyperactivity, inattention, and disruptive  
148 behaviour problems), psychosomatic complaints, addictive behaviour (including substance  
149 abuse and excessive use of electronic media), and post-traumatic stress symptoms.

150 These symptom categories match commonly described outcomes in research  
151 discussed previously and cover a broad range of mental health problems which can occur in  
152 childhood and adolescence.

153 In the view of the literature discussed above the following assumptions were derived  
154 regarding the three research questions:

155 1) Exposure to the COVID-19 pandemic is expected to result in an increase of general  
156 psychopathological stress levels and symptoms of mental disorders in children and  
157 adolescents compared to pre-pandemic levels, particularly internalising symptoms of  
158 depression and anxiety, externalising symptoms, attentional problems, post-traumatic  
159 stress, and psychosomatic symptoms.

- 160 2) Pandemic-related protection measures, particularly confinement and quarantine, are  
161 expected to have a negative effect on children's and adolescents' mental health.  
162 Reducing restrictions over the course of the pandemic should therefore be  
163 associated with decreasing symptoms of poor mental health.
- 164 3) Disadvantaged children and adolescents are expected to be more severely affected  
165 by the psychological effects of the COVID-19 pandemic. This includes children and  
166 adolescents who are dependent on special support due to precarious family,  
167 economic and social circumstances, disability, or illness.

## 168 **Methods**

### 169 **Literature research**

170 This review was carried out in accordance with the guidelines proposed by the  
171 Preferred Reporting Items for Systematic Reviews and Meta-Analyses (PRISMA) statement  
172 [26]. There was no registered protocol.

173 The literature research was conducted within the literature databases "Web of  
174 Science", "PubMed", and "APA PsycInfo". Each of these sources were consulted the last  
175 time on 12 January 2022. The following search strategy was used to identify studies  
176 examining the effect of the COVID-19 pandemic on child and adolescent mental health:  
177 "(COVID-19 OR corona\* OR SARS-CoV-2 OR novel coronavirus) AND (psychological OR  
178 psychopatholog\* OR mental health OR psychiatric disorders OR interna\* OR externa\* OR  
179 depress\* OR anxi\* OR sleep\* OR hyperact\* OR ADHD OR attention OR autis\* OR  
180 neurodevelopment\* OR disruptiv\* OR conduct OR defiant OR oppositional OR emotional OR  
181 behavio\* OR addict\*) AND (adolescent\* OR child\* OR youth OR minor\* OR teenager\* OR  
182 juvenile\*)". To ensure sufficient data, a broad range of mental health symptoms were initially  
183 included in the search terms.

184 If available at the respective databases, the following automatic filters were used:

185 The search terms named above had to appear in the title and/or abstract of the studies,

186 studies had to be peer-reviewed journal articles written in the English language and  
187 published between December 2019 and December 2021, participants had to be aged  
188 between 0 and 18 years, and methodology was restricted to quantitative designs.

189 Additional studies were identified via the ancestry approach. For this purpose,  
190 reference lists of studies included in the systematic review and of reviews and meta-  
191 analyses on the same topic were examined.

192 The identified studies were then manually screened multiple times by one author  
193 based on titles, abstracts, and methodology (i.e., longitudinal, repeated, or one-time cross-  
194 sectional). The remaining studies were then textually reviewed, and results were  
195 summarised in a table.

196 To narrow down the number of findings further, it was decided to only include studies  
197 with a longitudinal or repeated cross-sectional research design with at least one  
198 measurement during the pandemic and only studies which used community samples.

199 The process of study selection is depicted in Fig 1.



200 **Fig 1. Process and Results of Literature Research.** Adapted from Page et al. (2021) [26]

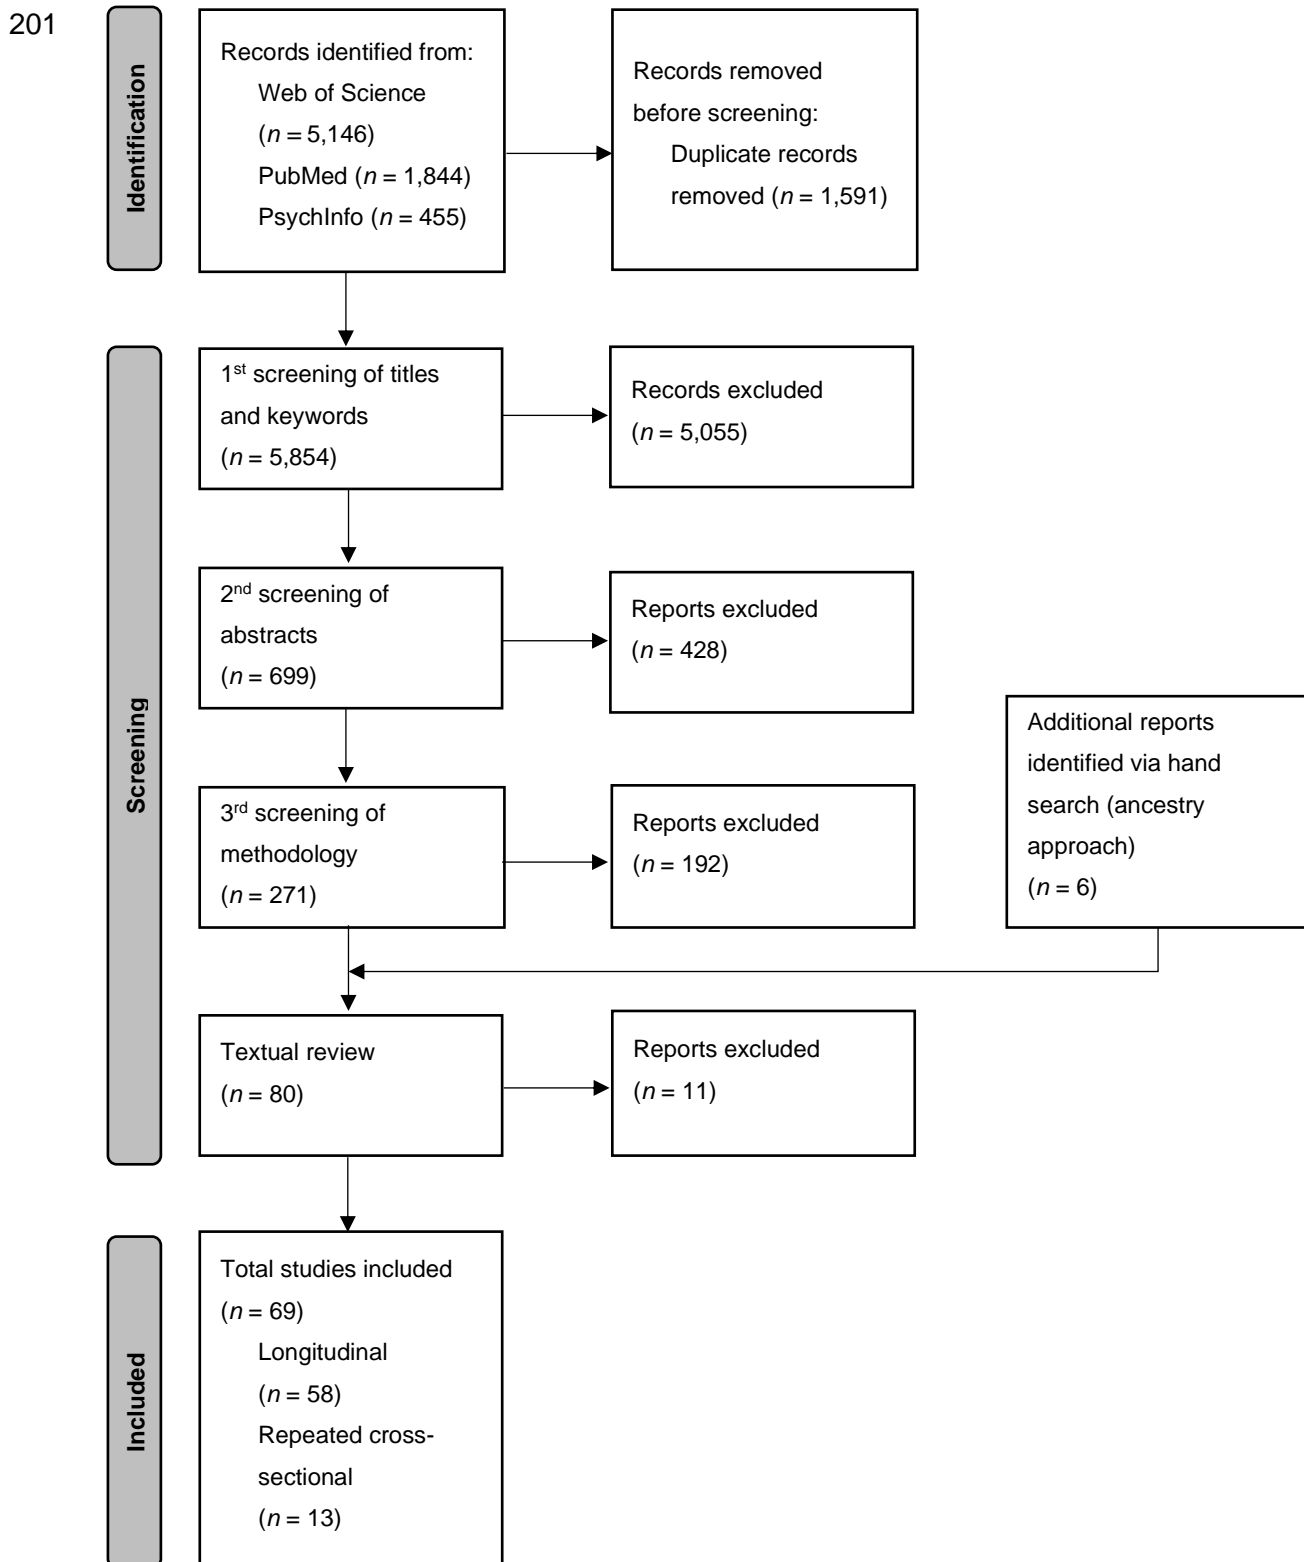

## 202 **Synthesis of results**

203 To synthesise the body of research supporting changes in distinct mental health  
204 outcomes more explicitly, the findings of studies comparing measures before and during the  
205 pandemic were sorted by examined outcome (e.g., depressive symptoms) and reported  
206 change in the outcome (i.e., increase, no change, or decrease from before to during the  
207 pandemic). The number of studies examining each mental health indicator and the number  
208 of findings for each possible direction of change were calculated and tabulated.

209 If possible, outcomes measuring overlapping constructs and symptom categories  
210 were grouped together to create larger pools of studies investigating each indicator to allow  
211 for more profound conclusions. In detail, the following outcomes were summarised as one  
212 mental health indicator, respectively:

- 213 • “Psychological well-being” and “quality of life” were grouped together.
- 214 • Total scores of scales assessing multiple mental health outcomes were summarised  
215 as “global measures of mental health problems”.
- 216 • “Internalising symptoms/problems” and “emotional symptoms/problems” were  
217 summarised as “internalising symptoms”.
- 218 • “Externalising symptoms/problems” and “behavioural symptoms/problems” were  
219 summarised as “externalising symptoms”.
- 220 • “Conduct”, “oppositional”, “challenging”, and “impulsive behaviour symptoms” were  
221 summarised as “disruptive behaviour symptoms”.
- 222 • “Inattention”, “attentional problems”, and “sluggish cognitive tempo” were  
223 summarised as “cognitive symptoms”.

224 The following psychopathological indicators and symptoms were included later in  
225 addition to the outcomes chosen a priori and named above, as they appeared in studies  
226 chosen for this review: Resilience, suicidal symptoms, neurotic symptoms, dissociative  
227 symptoms, eating disorder symptoms, and psychotic symptoms.

228 For the examination of overall directions of changes in mental health, the number of  
229 findings supporting an increase, no change, or decrease in a mental health indicator were  
230 separately added together. For this purpose, outcomes were grouped as “positive mental  
231 health indicators” if they are positively associated with mental health (e.g., well-being, quality  
232 of life, life satisfaction) and as “negative mental health indicators” if they are negatively  
233 associated with mental health (e.g., stress, negative affect, psychopathological symptoms).

234 The results of studies investigating changes over the course of the pandemic were  
235 synthesised separately. The emphasis was thereby put on findings on the effects of certain  
236 health protection measures (i.e., lockdown, confinement) and the general severity of  
237 restrictions on mental health outcomes.

238 To examine the data on different influencing factors (i.e., moderators, mediators,  
239 correlates) on the effect of the pandemic on mental health, factors reported by the identified  
240 studies were collected as “COVID-19 related stressors” or “other variables” and then  
241 tabularly sorted in the following categories:

- 242 • sociodemographic factors,
- 243 • intra-individual factors,
- 244 • parental/family factors,
- 245 • social factors,
- 246 • COVID-19-related factors,
- 247 • and behavioural factors.

248 Two additional approaches to review the studies’ findings were used post-hoc to  
249 identify sources of variance in outcomes between studies. To find evidence on systematic  
250 effects of a) the age of participants and b) the region where the respective studies were  
251 conducted, all studies examining changes from prior to during the pandemic were sorted by  
252 a) age of the participants (< six years, six–12 years, > 12 years) and b) country, respectively.  
253 For the evaluation of age effects, findings of an increase, no change, or decrease in each  
254 mental health indicator were counted separately. For the evaluation of the influence of

255 region, findings were only sorted by indicated direction of change in mental health and not by  
256 specific indicators due to the small number of studies for each country.

## 257 **Results**

### 258 **Sample characteristics**

259 In total, 69 studies, published between September 2020 and December 2021 and  
260 assessing around 130,000 participants, were included in this review. Fifty-eight of these  
261 studies used a longitudinal, within-subjects design. Thirteen studies applied a repeated  
262 cross-sectional, between-subjects design (e.g., cohort designs, matched convenience  
263 samples). Two of these studies analysed both within-subjects (i.e. intra-individual  
264 development) and between-subjects comparisons (i.e. age group comparisons) [27,28].

265 All included studies conducted their in-pandemic assessment between February  
266 2020 and June 2021, covering a period of 17 months. The majority of studies were carried  
267 out in the months of April ( $n = 33$ ), May ( $n = 37$ ) and June 2020 ( $n = 29$ ), which correlates  
268 with the first wave of the pandemic and the first lockdown in many countries. Far fewer  
269 studies were conducted after the summer of 2020 and in the first half of 2021. In 45 of the 69  
270 included studies, data was collected during lockdown, confinement, or stay-at-home orders.  
271 Fourteen studies assessed children's and adolescents' mental health indicators and/or  
272 symptoms multiple times during the pandemic [27–40].

273 In total, data from 21 countries, comprising 14 European, four Asian, two North  
274 American countries, and one South American country, was included in our review. Most  
275 studies were conducted in the United States of America ( $n = 14$ ), China ( $n = 8$ ), the United  
276 Kingdom ( $n = 7$ ), Germany ( $n = 6$ ), and Canada ( $n = 6$ ).

277 Concerning the age of the examined children and adolescents, all age groups  
278 between three and 18 years are included in this review. Hereby, early teenage years (i.e., 12  
279 to 14 years) were most frequently included in the study population, while research  
280 investigating effects on early childhood was rather rare. More concretely, nine studies

281 included participants aged six years or younger, 34 studies included participants aged six to  
282 12 years, and 44 studies included participants aged above 12 years. Note that some studies  
283 fell into multiple of these three groups.

## 284 **Overview of included studies**

285 Table 1 displays the longitudinal studies and the two studies using both longitudinal  
286 and repeated cross-sectional approaches. Table 2 depicts the remaining 11 repeated cross-  
287 sectional studies.

288 **Table 1. Overview of Longitudinal Studies (Same Sample).**

| No. | Authors                                | Assessment during pandemic               | Country     | $M_{Age}/Age$ range                                                                                      | $N$                          | Waves of assessment                                                                                                                      | COVID-19-related stressors/Other variables                                                                                                                                                                                              | Assessment of children's and adolescents' mental health                                                                                                                               | Main findings                                                                                                                                                                                                                                                                                                                                                                                                                          |
|-----|----------------------------------------|------------------------------------------|-------------|----------------------------------------------------------------------------------------------------------|------------------------------|------------------------------------------------------------------------------------------------------------------------------------------|-----------------------------------------------------------------------------------------------------------------------------------------------------------------------------------------------------------------------------------------|---------------------------------------------------------------------------------------------------------------------------------------------------------------------------------------|----------------------------------------------------------------------------------------------------------------------------------------------------------------------------------------------------------------------------------------------------------------------------------------------------------------------------------------------------------------------------------------------------------------------------------------|
| 1.  | Achterberg et al. (2021) [41]          | 04–05/2020 (lockdown)                    | Netherlands | <ul style="list-style-type: none"> <li><math>M = 12.00</math> years</li> <li>10–13 years</li> </ul>      | 106 parents and 151 children | <ul style="list-style-type: none"> <li>T1: 2016</li> <li>T2: 2017</li> <li>T3: 2018</li> <li>T4: 2019</li> <li>T5: 04–05/2020</li> </ul> | <ul style="list-style-type: none"> <li>parents' over-reactivity</li> <li>children's and parents' positive and negative coping strategies</li> <li>well-being of parents</li> <li>children's perceived stress during lockdown</li> </ul> | parent-report<br><ul style="list-style-type: none"> <li>internalising and externalising behaviour via Strengths and Difficulties Questionnaire (SDQ)</li> </ul>                       | <ul style="list-style-type: none"> <li>no change in internalising symptoms from T1–4 to T5</li> <li>stop of gradual decrease externalising behaviour from T2 to T4 at T5</li> <li>mediator of change of externalising problems: perceived stress (predicted by negative coping strategies of children and parents, prior parental over-reactivity)</li> </ul>                                                                          |
| 2.  | Aleksandrov and Okhrimenko (2020) [42] | 05/2020 (after two months of quarantine) | Ukraine     | <ul style="list-style-type: none"> <li>15–17 years</li> </ul>                                            | 152 adolescents              | <ul style="list-style-type: none"> <li>T1: 11/2019</li> <li>T2: 05/2020</li> </ul>                                                       |                                                                                                                                                                                                                                         | self-report<br><ul style="list-style-type: none"> <li>neurotic disorders via Neuroticism Questionnaire</li> <li>neurotic personality factors via Multifactor Questionnaire</li> </ul> | <ul style="list-style-type: none"> <li>increase of risk of neurotic disorders neurasthenia, psychasthenia, hypochondria, and depression from T1 to T2</li> <li>no change in symptoms of autonomic disturbances, histrionic personality disorder, derealisation, and depersonalization from T1 to T2</li> <li>correlates of increased neurotic symptoms: isolation, emotional instability, anxiety, timidity, worry, tension</li> </ul> |
| 3.  | Alt et al. (2021) [43]                 | 05–07/2020 (lockdown)                    | Germany     | <ul style="list-style-type: none"> <li><math>M_{T1} = 16.11</math> years</li> <li>14–17 years</li> </ul> | 843 adolescents              | <ul style="list-style-type: none"> <li>T1: 10/2018–08/2019</li> <li>T2: 05–07/2020</li> </ul>                                            | <ul style="list-style-type: none"> <li>extraversion</li> <li>loneliness</li> </ul>                                                                                                                                                      | self-report<br><ul style="list-style-type: none"> <li>depression via State-Trait Depression Scales (STDS)</li> </ul>                                                                  | <ul style="list-style-type: none"> <li>increase in depressive symptoms and loneliness from T1 to T2</li> <li>highly extroverted adolescent experienced larger rise in depressiveness, mediated through increase in loneliness</li> </ul>                                                                                                                                                                                               |

| No. | Authors                     | Assessment during pandemic                       | Country        | $M_{Age}/Age$ range                                                                                                                     | $N$                                            | Waves of assessment                                                                                                | COVID-19-related stressors/Other variables                                                                                               | Assessment of children's and adolescents' mental health                                                                                                                                                                                                                                                                         | Main findings                                                                                                                                                                                                                                                                                                                                                                                                                  |
|-----|-----------------------------|--------------------------------------------------|----------------|-----------------------------------------------------------------------------------------------------------------------------------------|------------------------------------------------|--------------------------------------------------------------------------------------------------------------------|------------------------------------------------------------------------------------------------------------------------------------------|---------------------------------------------------------------------------------------------------------------------------------------------------------------------------------------------------------------------------------------------------------------------------------------------------------------------------------|--------------------------------------------------------------------------------------------------------------------------------------------------------------------------------------------------------------------------------------------------------------------------------------------------------------------------------------------------------------------------------------------------------------------------------|
| 4.  | Bélanger (2021) [44]        | 05–07/2020 (lockdown)                            | Canada         | <ul style="list-style-type: none"> <li>• <math>M_{T1}</math> = 14.1 years</li> <li>• grades 9 to 12</li> <li>• ~ 13–18 years</li> </ul> | 2,099 adolescents                              | <ul style="list-style-type: none"> <li>• T1: 2018</li> <li>• T2: 2019</li> <li>• T3: 05–07/2020</li> </ul>         | <ul style="list-style-type: none"> <li>• friend support</li> <li>• time spent with friends</li> <li>• COVID-19 related stress</li> </ul> | self-report <ul style="list-style-type: none"> <li>• psychosocial well-being via Flourishing Scale (FS)</li> <li>• depression symptoms via Center for Epidemiologic Studies Depression Scale Revised (CESDR-10)</li> <li>• anxiety symptoms via Generalized Anxiety Disorder Scale (GAD-7)</li> </ul>                           | <ul style="list-style-type: none"> <li>• increase in depression and anxiety, decrease in psychological well-being across all waves</li> <li>• changes between T2 and T3 were not greater than between T1 and T2, i.e., no deterioration of mental health due to initial COVID-19 response</li> <li>• sex and age were no significant moderators of symptom development</li> </ul>                                              |
| 5.  | Bernasco et al. (2021) [45] | 04–07/2020 (partial lockdown and school closure) | Netherlands    | <ul style="list-style-type: none"> <li>• <math>M_{T1}</math> = 11.6 years</li> </ul>                                                    | 245 children and their parents                 | <ul style="list-style-type: none"> <li>• T1: 2019</li> <li>• T2: 04–07/2020</li> </ul>                             | <ul style="list-style-type: none"> <li>• friend support</li> <li>• time spent with friends</li> <li>• COVID-19 related stress</li> </ul> | parent-report <ul style="list-style-type: none"> <li>• internalising symptoms via internalising problems scale of the Child Behavior Checklist (CBCL)</li> </ul> self-report <ul style="list-style-type: none"> <li>• anxiety and depression symptoms via Revised Child Anxiety and Depression Scale (RCADS)</li> </ul>         | <ul style="list-style-type: none"> <li>• decrease from T1 to T2 in self-reported depression, anxiety, and friend support</li> <li>• no change in parent-reported internalising symptoms</li> <li>• higher pre-COVID-19 friend support predicted less self- and parent-reported internalising problems during COVID-19</li> <li>• time spent with friends and COVID-19 related stress were no significant moderators</li> </ul> |
| 6.  | Bignardi et al. (2021) [46] | 04–06/2020 (before and during lockdown)          | United Kingdom | <ul style="list-style-type: none"> <li>• <math>M</math> = 9.4/10.5 years</li> <li>• 7.6–11.6 years</li> </ul>                           | 168 children and their caregivers and teachers | <ul style="list-style-type: none"> <li>• T1: 06–12/2018 &amp; 12/2018–09/2019</li> <li>• T2: 04–06/2020</li> </ul> | <ul style="list-style-type: none"> <li>• friend support</li> <li>• time spent with friends</li> <li>• COVID-19 related stress</li> </ul> | caregiver- and teacher-report <ul style="list-style-type: none"> <li>• emotional symptoms via Strengths and Difficulties Questionnaire (SDQ)</li> </ul> caregiver- and self-report <ul style="list-style-type: none"> <li>• depression and anxiety via Revised Child Anxiety and Depression Scale (RCADS-short form)</li> </ul> | <ul style="list-style-type: none"> <li>• medium to large increase in depression symptoms from T1 to T2</li> <li>• no changes in anxiety and emotional problems from T1 to T2</li> </ul>                                                                                                                                                                                                                                        |

| No. | Authors                   | Assessment during pandemic                                | Country                  | $M_{Age}/Age$ range                                                                                                                               | $N$                                                             | Waves of assessment                                                                                                      | COVID-19-related stressors/Other variables                                                                                                                                                                        | Assessment of children's and adolescents' mental health                                                                                                                                                                                                                                                                                                                                                                               | Main findings                                                                                                                                                                                                                                                                                                                                                                                                                                                                                                                                                                                   |
|-----|---------------------------|-----------------------------------------------------------|--------------------------|---------------------------------------------------------------------------------------------------------------------------------------------------|-----------------------------------------------------------------|--------------------------------------------------------------------------------------------------------------------------|-------------------------------------------------------------------------------------------------------------------------------------------------------------------------------------------------------------------|---------------------------------------------------------------------------------------------------------------------------------------------------------------------------------------------------------------------------------------------------------------------------------------------------------------------------------------------------------------------------------------------------------------------------------------|-------------------------------------------------------------------------------------------------------------------------------------------------------------------------------------------------------------------------------------------------------------------------------------------------------------------------------------------------------------------------------------------------------------------------------------------------------------------------------------------------------------------------------------------------------------------------------------------------|
| 7.  | Borbás et al. (2021) [40] | 03–06/2020 (lockdown and partial school closure)          | Switzerland              | <ul style="list-style-type: none"> <li><math>M_{T1} = 9.58</math> years</li> <li><math>M_{T2} = 10.69</math> years</li> <li>7–17 years</li> </ul> | 26 children and 21 mothers                                      | <ul style="list-style-type: none"> <li>T1: 03/2018–02/2020</li> <li>T2-T8: 03–05/2020 (bi-weekly assessments)</li> </ul> | <ul style="list-style-type: none"> <li>mothers' burden of care</li> <li>mothers' well-being (anxiety, depression, physical health, distress)</li> <li>time spent outside</li> <li>meeting with friends</li> </ul> | parent-report <ul style="list-style-type: none"> <li>child behaviour via Child Behavior Checklist (CBCL)</li> </ul> self-report <ul style="list-style-type: none"> <li>emotional symptoms, conduct problems, peer problems, hyperactivity and prosocial behaviour via Strengths and Difficulties Questionnaire (SDQ)</li> <li>subjective mood ratings</li> </ul>                                                                      | <ul style="list-style-type: none"> <li>no change in children's average behavioural and emotional problems from T1 to T2–8</li> <li>decrease in conduct problems, hyperactivity, peer problems, emotional, and behavioural problems from T2 to T8, i.e., decrease in symptoms during restrictions</li> <li>increase in prosocial behaviour from T2 to T8</li> <li>significant predictors of children's symptoms and mood: mothers' subjective burden of care, mothers' depression, and meeting friends</li> </ul>                                                                                |
| 8.  | Breaux et al. (2021) [29] | 05–06/2020 (lockdown) & 07–08/2020 (lift of restrictions) | United States of America | <ul style="list-style-type: none"> <li>8th grade students</li> <li>~ 13 years</li> </ul>                                                          | 120 adolescents (+ 118 adolescents with ADHD not reported here) | <ul style="list-style-type: none"> <li>T1: 09/2018–02/2020</li> <li>T2: 05–06/2020</li> <li>T3: 07–08/2020</li> </ul>    | <ul style="list-style-type: none"> <li>emotion regulation abilities</li> </ul>                                                                                                                                    | self-report <ul style="list-style-type: none"> <li>sluggish cognitive tempo via Child Concentration Inventory, Second Edition (CCI-2)</li> <li>anxiety and depression symptoms via Revised Anxiety and Depression Scales (RCADS)</li> </ul> parent-report <ul style="list-style-type: none"> <li>hyperactivity, impulsivity, inattention, and oppositionality/defiance via Vanderbilt ADHD Diagnostic Rating Scale (VADRS)</li> </ul> | <ul style="list-style-type: none"> <li>increase in depression, anxiety, slower cognitive tempo, inattention, and oppositional symptoms from T1 to T2</li> <li>no change in hyperactivity and impulsivity across T1–T3</li> <li>decrease in all elevated symptoms (except inattention) from T2 to T3, i.e., decrease in symptoms after lift of restrictions</li> <li>risk factors for increased internalising and externalising symptoms: poorer pre-COVID-19 emotional regulation abilities, lower family income (inattention), higher family income (oppositional/defiant symptoms)</li> </ul> |



| No. | Authors                       | Assessment during pandemic                          | Country                  | $M_{Age}/Age$ range                                                                                                  | $N$                                                                     | Waves of assessment                                                                                             | COVID-19-related stressors/Other variables                                                                                                                       | Assessment of children's and adolescents' mental health                                                                                                                                                                                                                                                                                                  | Main findings                                                                                                                                                                                                                                                                                                                                                                                                                               |
|-----|-------------------------------|-----------------------------------------------------|--------------------------|----------------------------------------------------------------------------------------------------------------------|-------------------------------------------------------------------------|-----------------------------------------------------------------------------------------------------------------|------------------------------------------------------------------------------------------------------------------------------------------------------------------|----------------------------------------------------------------------------------------------------------------------------------------------------------------------------------------------------------------------------------------------------------------------------------------------------------------------------------------------------------|---------------------------------------------------------------------------------------------------------------------------------------------------------------------------------------------------------------------------------------------------------------------------------------------------------------------------------------------------------------------------------------------------------------------------------------------|
| 9.  | Browne et al. (2021) [47]     | 03/2020 (beginning of the pandemic, prior lockdown) | Canada                   | <ul style="list-style-type: none"> <li><math>M = 5.69</math> years</li> <li>3–12 years</li> </ul>                    | educators of 231 children                                               | <ul style="list-style-type: none"> <li>T1: 12/2019–01/2020</li> <li>T2: 02/2020</li> <li>T3: 03/2020</li> </ul> |                                                                                                                                                                  | educator-report <ul style="list-style-type: none"> <li>mental health problems via Strengths and Difficulties Questionnaire (SDQ)</li> <li>children's impairment (e.g., relationships with teacher and classmates, academic progress, self-esteem) via Impairment Rating Scale (IRS)</li> </ul>                                                           | <ul style="list-style-type: none"> <li>male children showed a modest decline in mental health problems (i.e., total difficulty and impairment score) at T1 to T2, i.e., mental health problems improved prior to the pandemic</li> <li>worsening of mental health of male children from T2 to T3</li> <li>no changes over time observed for female children</li> </ul>                                                                      |
| 10. | Chaffee et al. (2021) [48]    | 03–09/2020 (lockdown, stay-at-home order)           | United States of America | <ul style="list-style-type: none"> <li>9th–10th grade students</li> <li>~ 14–15 years</li> </ul>                     | 1,006 adolescents (T2 for 521 before stay-at-home order, for 485 after) | <ul style="list-style-type: none"> <li>T1: 03/2019–02/2020</li> <li>T2: 09/2019–09/2020</li> </ul>              | <ul style="list-style-type: none"> <li>physical activity</li> </ul>                                                                                              | self-report <ul style="list-style-type: none"> <li>substance use (e.g., alcohol, cigarettes, cannabis) via indication if and how often used in the last 30 days</li> </ul>                                                                                                                                                                               | <ul style="list-style-type: none"> <li>no change in use of tobacco, cannabis, and alcohol from T1 to T2</li> <li>decrease in use of e-cigarettes from T1 to T2 (both before and after stay-at-home order)</li> <li>sharp decrease in physical activity from T1 to T2 (after stay-at-home order)</li> </ul>                                                                                                                                  |
| 11. | I. H. Chen et al. (2021) [49] | 03/2020 (closure of schools)                        | China                    | <ul style="list-style-type: none"> <li><math>M_{T1} = 10.32</math> years</li> <li>primary school students</li> </ul> | 535 children                                                            | <ul style="list-style-type: none"> <li>T1: 10–11/2019</li> <li>T2: 03/2020</li> </ul>                           | <ul style="list-style-type: none"> <li>perceived academic performance</li> <li>time spent on gaming</li> <li>social media use</li> <li>smartphone use</li> </ul> | self-report <ul style="list-style-type: none"> <li>problematic Internet-related behaviours via Smartphone Application-Based Addiction Scale (SABAS), Bergen Social Media Addiction Scale (BSMAS), and Internet Gaming Disorder Scale-Short Form (IGDS9-SF)</li> <li>psychological distress via Depression, Anxiety, Stress Scale-21 (DASS-21)</li> </ul> | <ul style="list-style-type: none"> <li>increase in time spent on smartphone and social media use, not in time spent on gaming from T1 to T2</li> <li>decrease of problematic social media use and problematic gaming from T1 to T2</li> <li>increase in psychological distress from T1 to T2</li> <li>illness status and problematic Internet-related activities predicted psychological distress more strongly at T2 than at T1</li> </ul> |

| No. | Authors                       | Assessment during pandemic                  | Country                  | $M_{Age}/Age$ range                                                                                                | $N$                                                              | Waves of assessment                                                                                                                                                                                                                                | COVID-19-related stressors/Other variables                                                                                                                                                                                          | Assessment of children's and adolescents' mental health                                                                                                                                                                                                                           | Main findings                                                                                                                                                                                                                                                                                                                                                                                              |
|-----|-------------------------------|---------------------------------------------|--------------------------|--------------------------------------------------------------------------------------------------------------------|------------------------------------------------------------------|----------------------------------------------------------------------------------------------------------------------------------------------------------------------------------------------------------------------------------------------------|-------------------------------------------------------------------------------------------------------------------------------------------------------------------------------------------------------------------------------------|-----------------------------------------------------------------------------------------------------------------------------------------------------------------------------------------------------------------------------------------------------------------------------------|------------------------------------------------------------------------------------------------------------------------------------------------------------------------------------------------------------------------------------------------------------------------------------------------------------------------------------------------------------------------------------------------------------|
| 12. | Y. Chen et al. (2021) [50]    | 02–11/2020                                  | Sweden                   | <ul style="list-style-type: none"> <li>• <math>M_{T1}</math> = 13.6 years</li> <li>• ~ 15 years at T2</li> </ul>   | 1,900 adolescents (T2 for 1,316 before 02/2022, for 584 after)   | <ul style="list-style-type: none"> <li>• T1: 09/2015–06/2019</li> <li>• T2:                             <ul style="list-style-type: none"> <li>○ 09/2017–01/2020 control group</li> <li>○ 02–11/2020 COVID-19 exposed group</li> </ul> </li> </ul> | <ul style="list-style-type: none"> <li>• relationships with parents and peers</li> <li>• social support and relationships to peers</li> <li>• school environment</li> <li>• health behaviours (sleep, physical activity)</li> </ul> | self-report <ul style="list-style-type: none"> <li>• stress via 10-item Perceived Stress Scale (PSS-10)</li> <li>• psychosomatic symptoms via the PsychoSomatic Problem Scale (PSP Scale)</li> <li>• psychological well-being via Oxford happiness questionnaire (OHQ)</li> </ul> | <ul style="list-style-type: none"> <li>• increase of stress, psychosomatic symptoms and decrease of happiness from T1 to T2 for entire sample</li> <li>• no significant difference between control and exposed group at T2</li> <li>• no significant change in relationships to peers and parents, sleep duration and physical activity from T1 to T2</li> </ul>                                           |
| 13. | Cohen et al. (2021) [51]      | 05–06/2020 (reopening phase after lockdown) | United States of America | <ul style="list-style-type: none"> <li>• <math>M</math> = 14.53–15.22 years</li> </ul>                             | 24 adolescents (15 healthy, 9 with early life stress experience) | <ul style="list-style-type: none"> <li>• T1: 08/2019–02/2020</li> <li>• T2: 05–06/ 2020</li> </ul>                                                                                                                                                 | <ul style="list-style-type: none"> <li>• early life stress</li> <li>• parent and peer relationship quality</li> <li>• coping with COVID-19 pandemic</li> </ul>                                                                      | self-report <ul style="list-style-type: none"> <li>• symptoms of depression and anxiety via Patient-Reported Outcomes Measurement Information System (PROMIS)</li> </ul>                                                                                                          | <ul style="list-style-type: none"> <li>• increase in symptoms of depression and anxiety from T1 to T2 only for healthy adolescents but not for early life stress exposed adolescents</li> <li>• greater negative and fewer positive emotions in participants with early life stress than healthy participants</li> <li>• protective factors: coping by talking with friends, prioritizing sleep</li> </ul> |
| 14. | Daniunaite et al. (2021) [52] | 09–10/2020 (partial reopening of schools)   | Lithuania                | <ul style="list-style-type: none"> <li>• <math>M_{T1}</math> = 13.87 years</li> <li>• 12–16 years at T1</li> </ul> | 331 adolescents                                                  | <ul style="list-style-type: none"> <li>• T1: 03–06/2019</li> <li>• T2: 10/2020</li> </ul>                                                                                                                                                          |                                                                                                                                                                                                                                     | self-report <ul style="list-style-type: none"> <li>• emotional symptoms, conduct problems, peer problems, hyperactivity and prosocial behaviour via Strengths and Difficulties Questionnaire (SDQ)</li> </ul>                                                                     | <ul style="list-style-type: none"> <li>• increase in hyperactivity/inattention, emotional symptoms, and prosocial behaviour from T1 to T2</li> <li>• no change in conduct or peer problems from T1 to T2</li> <li>• significant increase in psychosocial problems in 70.7% of participants</li> <li>• increase only in peer problems in 19.6%</li> <li>• no negative change in 9.7%</li> </ul>             |

| No. | Authors                      | Assessment during pandemic                                  | Country                  | $M_{Age}/Age$ range                                                                                                                                | $N$                          | Waves of assessment                                                                                                            | COVID-19-related stressors/Other variables                                                                                                                  | Assessment of children's and adolescents' mental health                                                                                                                                                                                                                              | Main findings                                                                                                                                                                                                                                                                                                                                                                                                                                                                                                                                                            |
|-----|------------------------------|-------------------------------------------------------------|--------------------------|----------------------------------------------------------------------------------------------------------------------------------------------------|------------------------------|--------------------------------------------------------------------------------------------------------------------------------|-------------------------------------------------------------------------------------------------------------------------------------------------------------|--------------------------------------------------------------------------------------------------------------------------------------------------------------------------------------------------------------------------------------------------------------------------------------|--------------------------------------------------------------------------------------------------------------------------------------------------------------------------------------------------------------------------------------------------------------------------------------------------------------------------------------------------------------------------------------------------------------------------------------------------------------------------------------------------------------------------------------------------------------------------|
| 15. | de France et al. (2021) [53] | 05–06/2020 (start of loosening of restrictions)             | Canada                   | <ul style="list-style-type: none"> <li><math>M_{T1} = 13.9</math> years</li> <li><math>M_{T5} = 16.21</math> years</li> </ul>                      | 136 adolescents              | <ul style="list-style-type: none"> <li>T1–4: 2018–2020</li> <li>T5: 05–06/2020, six months after T4</li> </ul>                 | <ul style="list-style-type: none"> <li>impact of the pandemic (health, financial, lifestyle, fear of coronavirus)</li> <li>emotion dysregulation</li> </ul> | self-report <ul style="list-style-type: none"> <li>anxiety via Multidimensional Anxiety Scale for Children (MASC)</li> <li>depression via Children's Depression Inventory (CDI)</li> </ul>                                                                                           | <ul style="list-style-type: none"> <li>higher anxiety and depression scores at T5 than predicted by previous trajectories</li> <li>level of perceived lifestyle impact due to the pandemic associated with deviations from personal trajectories (moderator)</li> </ul>                                                                                                                                                                                                                                                                                                  |
| 16. | Deng et al. (2021) [54]      | 03–06/2020 (lockdown)                                       | United States of America | <ul style="list-style-type: none"> <li><math>M_{T1} = 11.77</math> years</li> <li><math>M_{T2} = 12.64</math> years</li> <li>9–15 years</li> </ul> | 115 children and adolescents | <ul style="list-style-type: none"> <li>21/28-day daily diary period</li> <li>T1: 01–09/2019</li> <li>T2: 03–06/2020</li> </ul> | <ul style="list-style-type: none"> <li>pre-existing emotion regulation strategies</li> <li>COVID-19 related worries and isolation</li> </ul>                | self-report <ul style="list-style-type: none"> <li>positive and negative affect level via 10-item Positive and Negative Affect Schedule for Children (PANAS-C)</li> </ul>                                                                                                            | <ul style="list-style-type: none"> <li>no significant difference in the mean levels of positive affect between T1 and T2</li> <li>increase in levels of negative affect from T1 to T2</li> <li>no change in variability of negative affect but decrease in variability of positive affect from T1 to T2</li> <li>positive emotion regulation strategies as predictors of more positive affect during pandemic</li> <li>negative emotion regulation strategies correlating with COVID-19 related worries as predictors of more negative affect during pandemic</li> </ul> |
| 17. | Essler et al. (2021) [30]    | 04–05/2020 (lockdown) & 07/2020 (loosening of restrictions) | Germany                  | <ul style="list-style-type: none"> <li>3–10 years</li> </ul>                                                                                       | 890 parents                  | <ul style="list-style-type: none"> <li>T1: 04–05/2020</li> <li>T2: 07/2020</li> </ul>                                          | <ul style="list-style-type: none"> <li>parental strain</li> <li>parental self-efficacy</li> <li>parent-child relationship quality</li> </ul>                | parent-report <ul style="list-style-type: none"> <li>well-being via KIDSCREEN-52 Health-Related Quality of Life Questionnaire for Children and Adolescents (12 items chosen for this study)</li> <li>problem behaviour via Strengths and Difficulties Questionnaire (SDQ)</li> </ul> | <ul style="list-style-type: none"> <li>decreases in parental stress, children's problem behaviour and increase in children's well-being from T1 to T2, i.e., decrease in symptoms after lift of restrictions</li> <li>decreases in parental strain predicted increase in child well-being and decrease in child problem behaviour from T1 to T2</li> <li>children's problem behaviour at T1 predicted parental stress at T2 and parental stress at T1 predicted children's problem behaviour at T2</li> </ul>                                                            |

| No. | Authors                     | Assessment during pandemic | Country                  | $M_{Age}/Age$ range                                                                                                                | $N$                           | Waves of assessment                                                                     | COVID-19-related stressors/Other variables                                                                                                                                   | Assessment of children's and adolescents' mental health                                                                                                                                                       | Main findings                                                                                                                                                                                                                                                                                                                                                                                                                                                                                                     |
|-----|-----------------------------|----------------------------|--------------------------|------------------------------------------------------------------------------------------------------------------------------------|-------------------------------|-----------------------------------------------------------------------------------------|------------------------------------------------------------------------------------------------------------------------------------------------------------------------------|---------------------------------------------------------------------------------------------------------------------------------------------------------------------------------------------------------------|-------------------------------------------------------------------------------------------------------------------------------------------------------------------------------------------------------------------------------------------------------------------------------------------------------------------------------------------------------------------------------------------------------------------------------------------------------------------------------------------------------------------|
| 18. | Ezpeleta et al. (2020) [55] | 06/2020 (after lockdown)   | Spain                    | <ul style="list-style-type: none"> <li><math>M_{T2} = 13.9</math> years</li> <li>12 years at T1</li> <li>13 years at T2</li> </ul> | 197 parents                   | <ul style="list-style-type: none"> <li>T1: 2019</li> <li>T2: 06/2020</li> </ul>         | <ul style="list-style-type: none"> <li>adolescents' living conditions during lockdown (physical environment, relationships, activities, feelings, and behaviours)</li> </ul> | parent-report <ul style="list-style-type: none"> <li>emotional symptoms, conduct problems, peer problems, hyperactivity and prosocial behaviour via Strengths and Difficulties Questionnaire (SDQ)</li> </ul> | <ul style="list-style-type: none"> <li>increase in conduct, peer, prosocial and total problem scores from T1 to T2</li> <li>decrease in emotional problems from T1 to T2</li> <li>no change in hyperactivity/inattention problems from T1 to T2</li> <li>factors associated with elevated symptoms: unhealthy activities, feelings, and behaviour (e.g., frustration, boredom, sleep problems, excessive concerns about health), worsening of relationships with others, dysfunctional parenting style</li> </ul> |
| 19. | Feinberg et al. (2021) [56] | 04–05/2020 (lockdown)      | United States of America | <ul style="list-style-type: none"> <li><math>M_{T1} = 7</math> years</li> <li><math>M_{T2} = 9.9</math> years</li> </ul>           | 206 parents from 129 families | <ul style="list-style-type: none"> <li>T1: 2017–2019</li> <li>T2: 04–05/2020</li> </ul> | <ul style="list-style-type: none"> <li>parents' depression and anxiety</li> <li>household income</li> <li>parenting quality</li> </ul>                                       | parent-report <ul style="list-style-type: none"> <li>externalising and internalising problems via Strengths and Difficulties Questionnaire (SDQ)</li> </ul>                                                   | <ul style="list-style-type: none"> <li>increase in children's internalising and externalising problems from T1 to T2</li> <li>increase in parents' depression and anxiety, decrease in co-parenting and parenting quality from T1 to T2</li> <li>risk factor: lower family income</li> </ul>                                                                                                                                                                                                                      |

| No. | Authors                  | Assessment during pandemic                    | Country | $M_{Age}/Age$ range                                                                                                          | $N$                          | Waves of assessment                                                                                     | COVID-19-related stressors/Other variables                                                              | Assessment of children's and adolescents' mental health                                                                                                                                                                                                                                                                                             | Main findings                                                                                                                                                                                                                                                                                                                                                                                                                                                                                                                                                                                                                                                                                         |
|-----|--------------------------|-----------------------------------------------|---------|------------------------------------------------------------------------------------------------------------------------------|------------------------------|---------------------------------------------------------------------------------------------------------|---------------------------------------------------------------------------------------------------------|-----------------------------------------------------------------------------------------------------------------------------------------------------------------------------------------------------------------------------------------------------------------------------------------------------------------------------------------------------|-------------------------------------------------------------------------------------------------------------------------------------------------------------------------------------------------------------------------------------------------------------------------------------------------------------------------------------------------------------------------------------------------------------------------------------------------------------------------------------------------------------------------------------------------------------------------------------------------------------------------------------------------------------------------------------------------------|
| 20. | Fung et al. (2021) [31]  | 03/2020 & 06/2020 (outbreak to post-lockdown) | China   | <ul style="list-style-type: none"> <li><math>M_{T3} = 11.6</math> years</li> <li>9.8–13.68 years at T1</li> </ul>            | 489 children and adolescents | <ul style="list-style-type: none"> <li>T1: 01/2020</li> <li>T2: 03/2020</li> <li>T3: 06/2020</li> </ul> | <ul style="list-style-type: none"> <li>perceived weight stigma</li> </ul>                               | self-report <ul style="list-style-type: none"> <li>problematic smart phone use via Smartphone Application-Based Addiction Scale (SABAS)</li> <li>problematic social media use via Bergen Social Media Addiction Scale (BSMAS)</li> <li>psychological distress, depression and anxiety via Depression, Anxiety, Stress Scale-21 (DASS-21)</li> </ul> | <ul style="list-style-type: none"> <li>no change of depressive symptoms from T1 to T2, decrease of depressive symptoms from T2 to T3, i.e., decrease of symptoms from outbreak to post-lockdown</li> <li>decrease of anxiety and weight stigma from T1 to T2, no change from T2 to T3, i.e., decrease of symptoms from pre-pandemic to outbreak</li> <li>no change of depressive and anxiety symptoms from T1 to T3</li> <li>increase of stress and problematic smartphone use from T1 to T2 and T3, i.e., increase of symptoms from pre-pandemic to outbreak and post-lockdown</li> <li>increase in association between problematic social media use and depression/anxiety from T1 to T3</li> </ul> |
| 21. | Genta et al. (2021) [57] | 06/2020 (lockdown)                            | Brazil  | <ul style="list-style-type: none"> <li><math>M_{T1} = 15.0</math> years</li> <li><math>M_{T2} = 16.4</math> years</li> </ul> | 94 adolescents               | <ul style="list-style-type: none"> <li>T1: 03/2019</li> <li>T2: 06/2020</li> </ul>                      | <ul style="list-style-type: none"> <li>sleep quality</li> <li>sleepiness</li> <li>chronotype</li> </ul> | self-report <ul style="list-style-type: none"> <li>quality of life via World Health Organization Quality of Life Questionnaire-abbreviated version (WHOQOL-BREF)</li> </ul>                                                                                                                                                                         | <ul style="list-style-type: none"> <li>worsening of physical and psychological domains of quality of life from T1 to T2</li> <li>improvement of environmental domain of quality of life from T1 to T2</li> <li>increase of sleep duration and sleep quality only among more students who were sleep deprived pre-pandemic</li> <li>delayed wake-up times and shifted chronotype to “eveningness” during pandemic</li> </ul>                                                                                                                                                                                                                                                                           |

| No. | Authors                         | Assessment during pandemic              | Country                  | $M_{Age}/Age$ range                                                                                   | $N$               | Waves of assessment                                                                                                        | COVID-19-related stressors/Other variables                                                                                                                                                    | Assessment of children's and adolescents' mental health                                                                                                                                                                                             | Main findings                                                                                                                                                                                                                                                                                                                                                                                                           |
|-----|---------------------------------|-----------------------------------------|--------------------------|-------------------------------------------------------------------------------------------------------|-------------------|----------------------------------------------------------------------------------------------------------------------------|-----------------------------------------------------------------------------------------------------------------------------------------------------------------------------------------------|-----------------------------------------------------------------------------------------------------------------------------------------------------------------------------------------------------------------------------------------------------|-------------------------------------------------------------------------------------------------------------------------------------------------------------------------------------------------------------------------------------------------------------------------------------------------------------------------------------------------------------------------------------------------------------------------|
| 22. | Giménez-Dasí et al. (2020) [58] | 04/2020 (lockdown)                      | Spain                    | <ul style="list-style-type: none"> <li><math>M = 7.02</math> years</li> <li>3.2–11.1 years</li> </ul> | 113 parents       | <ul style="list-style-type: none"> <li>T1: 02/2020</li> <li>T2: 04/2020</li> </ul>                                         |                                                                                                                                                                                               | parent-report <ul style="list-style-type: none"> <li>attentional problems, depression, challenging behaviours, emotional regulation, hyperactivity, and willingness to study via System of Evaluation of Children and Adolescents (SENA)</li> </ul> | <ul style="list-style-type: none"> <li>increase in emotional, attentional, behavioural (hyperactivity, impulsivity) problems, and decrease in willingness to study among six- to 10-year-olds from T1 to T2</li> <li>no change among three-year-old children</li> <li>no changes in depression and challenging behaviour</li> </ul>                                                                                     |
| 23. | Giménez-Dasí et al. (2020) [32] | 03-04/2020 (lockdown) & 12/2020–02/2021 | Spain                    | <ul style="list-style-type: none"> <li><math>M = 8.53</math> years</li> <li>6–11 years</li> </ul>     | 215 children      | <ul style="list-style-type: none"> <li>T1: 12/2019–02/2020</li> <li>T2: 03–04/2020</li> <li>T3: 12/2020–02/2021</li> </ul> |                                                                                                                                                                                               | self-report <ul style="list-style-type: none"> <li>anxiety via anxiety scale from System of Evaluation of Children and Adolescents (SENA)</li> </ul>                                                                                                | <ul style="list-style-type: none"> <li>decrease in anxiety from T1 to T2 and T3, only in children between eight and 11 years</li> <li>no change in anxiety from T1 to T2 for whole sample</li> <li>no change over all waves for children younger than 8 years</li> </ul>                                                                                                                                                |
| 24. | Gladstone et al. (2021) [59]    | 05/2020 (lockdown)                      | United States of America | <ul style="list-style-type: none"> <li><math>M = 14.5</math> years</li> <li>12–18 years</li> </ul>    | 228 adolescents   | <ul style="list-style-type: none"> <li>T1: 11/2019–01/2020</li> <li>T2: 05/2020</li> </ul>                                 | <ul style="list-style-type: none"> <li>vulnerability (cognitive styles, attitudes)</li> <li>protective factors (resilience, conflict behaviour)</li> <li>COVID-19 related distress</li> </ul> | self-report <ul style="list-style-type: none"> <li>depressive symptoms via Patient Health Questionnaire-Adolescent (PHQ-A)</li> </ul>                                                                                                               | <ul style="list-style-type: none"> <li>increase in depressive symptoms from T1 to T2 (4.9% to 5.7% with moderately severe to severe symptoms)</li> <li>overall mean of depressive symptoms in minimum symptom range at T1 and T2</li> <li>predictors of increase in depressive symptoms: low resilience, negative cognitive style, COVID-19-related distress, female gender</li> </ul>                                  |
| 25. | Hafstad et al. (2021) [60]      | 06/2020 (reopening of schools)          | Norway                   | <ul style="list-style-type: none"> <li>12–16 years</li> </ul>                                         | 3,572 adolescents | <ul style="list-style-type: none"> <li>T1: 02/2019</li> <li>T2: 06/2020</li> </ul>                                         | <ul style="list-style-type: none"> <li>pandemic-related worries</li> <li>loneliness</li> <li>family affluence</li> </ul>                                                                      | self-report <ul style="list-style-type: none"> <li>anxiety and depressive symptoms via Hopkins Symptom Checklist (HSCL-10)</li> </ul>                                                                                                               | <ul style="list-style-type: none"> <li>slight increase of anxiety and depression from T1 to T2 (5.5% to 6.3%) caused by increase in age from T1 to T2</li> <li>predictors of higher levels of symptoms: female gender, pre-existing mental health problems, living in a single-parent-household</li> <li>predictors of lower increase in symptoms: low family socio-economic status, history of maltreatment</li> </ul> |

| No. | Authors                        | Assessment during pandemic          | Country        | $M_{Age}/Age$ range                                                                                           | $N$                          | Waves of assessment                                                                           | COVID-19-related stressors/Other variables                                                                                                                                                                                      | Assessment of children's and adolescents' mental health                                                                                                                                                      | Main findings                                                                                                                                                                                                                                                                                                                                                                                                                                                                                                                                                                                                                                                             |
|-----|--------------------------------|-------------------------------------|----------------|---------------------------------------------------------------------------------------------------------------|------------------------------|-----------------------------------------------------------------------------------------------|---------------------------------------------------------------------------------------------------------------------------------------------------------------------------------------------------------------------------------|--------------------------------------------------------------------------------------------------------------------------------------------------------------------------------------------------------------|---------------------------------------------------------------------------------------------------------------------------------------------------------------------------------------------------------------------------------------------------------------------------------------------------------------------------------------------------------------------------------------------------------------------------------------------------------------------------------------------------------------------------------------------------------------------------------------------------------------------------------------------------------------------------|
| 26. | Hollenstein et al. (2021) [61] | 05-06/2020 (lockdown)               | Canada         | <ul style="list-style-type: none"> <li><math>M_{T1} = 12.49</math> years</li> <li>T1: 12–13 years</li> </ul>  | 155 mothers, 146 adolescents | <ul style="list-style-type: none"> <li>T1: 09/2019–03/2020</li> <li>T2: 05–06/2020</li> </ul> | <ul style="list-style-type: none"> <li>mothers' anxiety and depression</li> <li>mothers' hardship</li> <li>child positive and negative changes (e.g., sleep, school pressure, time with family, worry about illness)</li> </ul> | self-report <ul style="list-style-type: none"> <li>anxiety symptoms via Beck Anxiety Inventory (BAI)</li> <li>depressive symptoms via The Children's Depression Inventory, Second Edition (CDI-2)</li> </ul> | <ul style="list-style-type: none"> <li>increase in adolescents' and mothers' depression from T1 to T2 (especially in females)</li> <li>decrease in adolescents' and mothers' anxiety from T1 to T2 (especially in males and for individuals with high pre-pandemic anxiety)</li> <li>risk factor for stronger increase in depressive symptoms: more negative changes due to COVID-19 (e.g., less contact to friends, stress, worry about health)</li> </ul>                                                                                                                                                                                                               |
| 27. | Hu and Qian (2021) [62]        | 07/2020 (loosening if restrictions) | United Kingdom | <ul style="list-style-type: none"> <li><math>M_{T2} = 13.3</math> years</li> <li>10–16 years at T2</li> </ul> | 886 adolescents              | <ul style="list-style-type: none"> <li>T1: before 03/2020</li> <li>T2: 07/2020</li> </ul>     | <ul style="list-style-type: none"> <li>family income</li> <li>living conditions (e.g., co-residence with other children, single parent)</li> </ul>                                                                              | self-report <ul style="list-style-type: none"> <li>emotional symptoms, conduct problems, peer problems, hyperactivity and prosocial behaviour via Strengths and Difficulties Questionnaire (SDQ)</li> </ul>  | <ul style="list-style-type: none"> <li>increase in psychopathological symptoms (emotional problems, conduct problems, hyperactivity, peer relationship problems) and decrease in prosocial tendencies from T1 to T2 for adolescents with relatively good mental health at T1</li> <li>decrease in psychopathological symptoms, increase in prosocial behaviour from T1 to T2 in adolescents with worse than median mental health at T1</li> <li>boys showed smaller increase in emotional problems but greater decrease in prosocial tendency than girls</li> <li>risk factors for negative mental health impact: only child, single-parent, low family income</li> </ul> |

| No. | Authors                     | Assessment during pandemic             | Country                  | $M_{Age}/Age$ range                                                                                                                    | $N$                                                 | Waves of assessment                                                                                                                 | COVID-19-related stressors/Other variables                                                                                                                                  | Assessment of children's and adolescents' mental health                                                                                                                                                                                                                                        | Main findings                                                                                                                                                                                                                                                                                                                                                    |
|-----|-----------------------------|----------------------------------------|--------------------------|----------------------------------------------------------------------------------------------------------------------------------------|-----------------------------------------------------|-------------------------------------------------------------------------------------------------------------------------------------|-----------------------------------------------------------------------------------------------------------------------------------------------------------------------------|------------------------------------------------------------------------------------------------------------------------------------------------------------------------------------------------------------------------------------------------------------------------------------------------|------------------------------------------------------------------------------------------------------------------------------------------------------------------------------------------------------------------------------------------------------------------------------------------------------------------------------------------------------------------|
| 28. | Hussong et al. (2021) [63]  | 05-07/2020 (lockdown, school closures) | United States of America | <ul style="list-style-type: none"> <li><math>M_{T4} = 13.6</math> years</li> <li>6–9 years at T1</li> <li>12–16 years at T4</li> </ul> | 105 parent-child dyads                              | <ul style="list-style-type: none"> <li>T1: 2013/14</li> <li>T2: 2015/2016</li> <li>T3: 2016/2017</li> <li>T4: 05–07/2020</li> </ul> | <ul style="list-style-type: none"> <li>child-reported self-efficacy</li> <li>child-reported optimism</li> <li>child-reported coping</li> </ul>                              | parent-report <ul style="list-style-type: none"> <li>internalising and externalising problems via Paediatric Symptom Checklist (PSC)</li> </ul>                                                                                                                                                | <ul style="list-style-type: none"> <li>increase in mental health symptoms from T1–3 to T4</li> <li>protective/mitigating factors: self-efficacy, problem-focused engaged coping</li> <li>optimism did not mitigate risk of mental health problems</li> <li>risk factors for worsening of mental health: emotion-focused engaged and disengaged coping</li> </ul> |
| 29. | Hyunshik et al. (2021) [64] | 10/2020                                | Japan                    | <ul style="list-style-type: none"> <li><math>M_{T2} = 4.8</math> years</li> <li>3–5 years at T2</li> </ul>                             | 290 parent-child dyads (high socio-economic status) | <ul style="list-style-type: none"> <li>T1: 10/2019</li> <li>T2: 10/2020</li> </ul>                                                  | <ul style="list-style-type: none"> <li>physical activity</li> <li>adherence to WHO-recommended screen time</li> <li>prosocial behaviours</li> <li>sleep duration</li> </ul> | parent-report <ul style="list-style-type: none"> <li>emotional symptoms, conduct problems, peer problems, hyperactivity and prosocial behaviour via Strengths and Difficulties Questionnaire (SDQ)</li> </ul>                                                                                  | <ul style="list-style-type: none"> <li>increase in sedentary behaviour and hyperactivity from T1 to T2</li> <li>no change in total difficulty score, emotional problems, conduct problems and peer problems from T1 to T2</li> <li>decrease in physical activity, adherence to recommended screen use and prosocial behaviours from T1 to T2</li> </ul>          |
| 30. | Jiang et al. (2021) [65]    | 04/2020 (lockdown)                     | China                    | <ul style="list-style-type: none"> <li><math>M = 13.85</math> years</li> <li>11–16 years</li> </ul>                                    | 257 students                                        | <ul style="list-style-type: none"> <li>T1: 11–12/2019</li> <li>T2: 04/2020</li> </ul>                                               | <ul style="list-style-type: none"> <li>social support</li> </ul>                                                                                                            | self-report <ul style="list-style-type: none"> <li>resilience via Resilience Scale for Chinese Adolescents (RSCA)</li> <li>depression via Center for Epidemiologic Studies Depression Scale for Children (CES-DC)</li> <li>sleep problems via Pittsburgh Sleep Quality Index (PSQI)</li> </ul> | <ul style="list-style-type: none"> <li>decrease of resilience from T1 to T2</li> <li>resilience as a protective factor against depression and sleep problems</li> <li>social support as a moderator of effect of resilience on depression and sleep</li> </ul>                                                                                                   |



| No. | Authors                   | Assessment during pandemic                     | Country | $M_{Age}/Age$ range                                                                                 | $N$                                                                     | Waves of assessment                                                                                     | COVID-19-related stressors/Other variables                                                                                                                                                                                                         | Assessment of children's and adolescents' mental health                                                                                                                                                                                                                                                                                                                                   | Main findings                                                                                                                                                                                                                                                                                                                                                                                                                                                 |
|-----|---------------------------|------------------------------------------------|---------|-----------------------------------------------------------------------------------------------------|-------------------------------------------------------------------------|---------------------------------------------------------------------------------------------------------|----------------------------------------------------------------------------------------------------------------------------------------------------------------------------------------------------------------------------------------------------|-------------------------------------------------------------------------------------------------------------------------------------------------------------------------------------------------------------------------------------------------------------------------------------------------------------------------------------------------------------------------------------------|---------------------------------------------------------------------------------------------------------------------------------------------------------------------------------------------------------------------------------------------------------------------------------------------------------------------------------------------------------------------------------------------------------------------------------------------------------------|
| 31. | Larsen et al. (2021) [66] | 04–05/2020 (school closures, social isolation) | Norway  | <ul style="list-style-type: none"> <li><math>M = 11.43</math> years</li> </ul>                      | 442 children and their parents (sample from family counselling centres) | <ul style="list-style-type: none"> <li>T1&amp;T2: 12/2017–07/2019</li> <li>T3: 04–05/2020</li> </ul>    | <ul style="list-style-type: none"> <li>psychological vulnerability at T1/T2</li> <li>home-schooling experiences</li> <li>family stress and instability</li> <li>screen time use</li> <li>missing friends</li> <li>worry about infection</li> </ul> | self-report <ul style="list-style-type: none"> <li>emotional symptoms via five items created for the study</li> <li>somatic/cognitive symptoms via three items created for the study</li> <li>worry reactions via two items created for the study</li> </ul>                                                                                                                              | <ul style="list-style-type: none"> <li>decrease in emotional symptoms (feelings of sadness, anger, anxiety, unsafeness) from T1 and T2 to T3</li> <li>increase in somatic/cognitive symptoms (feelings of loneliness, sleeping and concentration problems) T1 and T2 to T3</li> <li>predictors of higher psychological vulnerability: home-schooling experiences, family stress and instability, missing friends, worry about infection, older age</li> </ul> |
| 32. | Liang et al. (2021) [33]  | 03–05/2020 (lockdown)                          | Italy   | <ul style="list-style-type: none"> <li><math>M = 14.13</math> years</li> <li>11–18 years</li> </ul> | 288 parents                                                             | <ul style="list-style-type: none"> <li>T1: 03/2020</li> <li>T2: 04/2020</li> <li>T3: 05/2020</li> </ul> | <ul style="list-style-type: none"> <li>parental stress</li> <li>parental expressive suppression (tendency to inhibit expression of emotions)</li> </ul>                                                                                            | parent-report <ul style="list-style-type: none"> <li>depression via Impact Scale of COVID-19 and Home Confinement on Children and Adolescents, and Short Mood and Feelings Questionnaire-Parent Version (SMFQ-P)</li> <li>anxiety via Impact Scale of COVID-19 and Home Confinement on Children and Adolescents, and Spence Children's Anxiety Scale-Parent Version (SCAS-P-8)</li> </ul> | <ul style="list-style-type: none"> <li>increase in anxiety and depression symptoms from T1 to T2</li> <li>slight decrease of anxiety symptoms and no change in depression symptoms from T2 to T3</li> <li>increased restrictions associated with more severe symptoms</li> <li>parental stress associated with adolescents' internalising symptoms over parental expressive suppression</li> </ul>                                                            |
| 33. | Liao et al. (2021) [67]   | 07/2020                                        | China   | <ul style="list-style-type: none"> <li><math>M = 13.4</math> years</li> <li>11–16 years</li> </ul>  | 2,496 adolescents                                                       | <ul style="list-style-type: none"> <li>T1: 12/2019</li> <li>T2: 07/2020</li> </ul>                      | <ul style="list-style-type: none"> <li>sleep duration</li> </ul>                                                                                                                                                                                   | self-report <ul style="list-style-type: none"> <li>depression via Center of Epidemiological Studies Depression Scale for Children (CES-DC)</li> </ul>                                                                                                                                                                                                                                     | <ul style="list-style-type: none"> <li>increase of depression and decrease in sleep duration from T1 to T2</li> <li>shortened sleep duration at T1 predictive of increased depressive symptoms at T2, depressive symptoms at T1 predictive of decreased sleep duration at T2</li> </ul>                                                                                                                                                                       |

| No. | Authors                     | Assessment during pandemic | Country | $M_{Age}/Age$ range                                                                                | $N$                   | Waves of assessment                                                                      | COVID-19-related stressors/Other variables                                                                                                                                                                                                                          | Assessment of children's and adolescents' mental health                                                       | Main findings                                                                                                                                                                                                                                                                                                                                                                                                                                                                                                                                                                                                                                                                                                                                                                                                                                                                               |
|-----|-----------------------------|----------------------------|---------|----------------------------------------------------------------------------------------------------|-----------------------|------------------------------------------------------------------------------------------|---------------------------------------------------------------------------------------------------------------------------------------------------------------------------------------------------------------------------------------------------------------------|---------------------------------------------------------------------------------------------------------------|---------------------------------------------------------------------------------------------------------------------------------------------------------------------------------------------------------------------------------------------------------------------------------------------------------------------------------------------------------------------------------------------------------------------------------------------------------------------------------------------------------------------------------------------------------------------------------------------------------------------------------------------------------------------------------------------------------------------------------------------------------------------------------------------------------------------------------------------------------------------------------------------|
| 34. | Mastorci et al. (2021) [68] | 04/2020 (lockdown)         | Italy   | <ul style="list-style-type: none"> <li><math>M = 12.5</math> years</li> <li>10–14 years</li> </ul> | 1,289 adolescents     | <ul style="list-style-type: none"> <li>T1: 09–10/2019</li> <li>T2: 04/2020</li> </ul>    | <ul style="list-style-type: none"> <li>dietary habits</li> <li>physical activity</li> <li>housing, living in a city/countryside</li> <li>sleep quality</li> <li>maintaining contact with friends over smartphone use</li> </ul>                                     | self-report <ul style="list-style-type: none"> <li>health-related quality of life via KIDSCREEN-52</li> </ul> | <ul style="list-style-type: none"> <li>decrease of psychological and physical well-being from T1 to T2 (reduced autonomy, worse mood, and emotion, reduced financial resources, worsening in relationships to family and friends)</li> <li>moderating factors: gender, housing, and environmental conditions                             <ul style="list-style-type: none"> <li>females showed lower scores for psychological and physical well-being, self-perception, and mood/emotion than boys</li> <li>males showed lower scores in physical activity than girls</li> <li>greater reduction in autonomy and peer relationships in adolescents living in a village than in a city</li> <li>greater reduction of physical well-being for adolescents living in a city and in an apartment without green space than adolescents living in a village and in a house</li> </ul> </li> </ul> |
| 35. | O'Kane et al. (2021) [69]   | 05–06/2020 (lockdown)      | Ireland | <ul style="list-style-type: none"> <li><math>M = 12.8</math> years</li> <li>12–14 years</li> </ul> | 94 female adolescents | <ul style="list-style-type: none"> <li>T1: 09–10/2019</li> <li>T2: 05–06/2020</li> </ul> | <ul style="list-style-type: none"> <li>emotion regulation</li> <li>self-efficacy</li> <li>physical activity</li> <li>sleep quality</li> <li>social media usage and emotional investment in social media</li> <li>body weight and appearance satisfaction</li> </ul> | self-report <ul style="list-style-type: none"> <li>health-related quality of life via KIDSCREEN-10</li> </ul> | <ul style="list-style-type: none"> <li>decrease in health-related quality of life and motivation to exercise from T1 to T2</li> <li>increase in happiness with appearance from T1 to T2</li> <li>no change in self-reported physical activity, sleep quality, social media usage from T1 to T2</li> </ul>                                                                                                                                                                                                                                                                                                                                                                                                                                                                                                                                                                                   |

| No. | Authors                    | Assessment during pandemic | Country                | $M_{Age}/Age$ range                                                                                | $N$                                     | Waves of assessment                                                                                                                                                                      | COVID-19-related stressors/Other variables                                                                                                                                                                                                                                                                                                                                                                                        | Assessment of children's and adolescents' mental health                                                                                                                                             | Main findings                                                                                                                                                                                                                                                                                                                                                                                                                                                                                                                                                                                                                                                                                                                                                                                                                                                                                                                                                                                                          |
|-----|----------------------------|----------------------------|------------------------|----------------------------------------------------------------------------------------------------|-----------------------------------------|------------------------------------------------------------------------------------------------------------------------------------------------------------------------------------------|-----------------------------------------------------------------------------------------------------------------------------------------------------------------------------------------------------------------------------------------------------------------------------------------------------------------------------------------------------------------------------------------------------------------------------------|-----------------------------------------------------------------------------------------------------------------------------------------------------------------------------------------------------|------------------------------------------------------------------------------------------------------------------------------------------------------------------------------------------------------------------------------------------------------------------------------------------------------------------------------------------------------------------------------------------------------------------------------------------------------------------------------------------------------------------------------------------------------------------------------------------------------------------------------------------------------------------------------------------------------------------------------------------------------------------------------------------------------------------------------------------------------------------------------------------------------------------------------------------------------------------------------------------------------------------------|
| 36. | Orgilés et al. (2021) [34] | 03–05/2020 (lockdown)      | Italy, Spain, Portugal | <ul style="list-style-type: none"> <li><math>M = 8.94</math> years</li> <li>3–18 years</li> </ul>  | parents of 624 children and adolescents | <ul style="list-style-type: none"> <li>T1: 2 weeks into first lockdown 2020</li> <li>T2: 5 weeks after beginning of lockdown</li> <li>T3: 8 weeks after beginning of lockdown</li> </ul> | <ul style="list-style-type: none"> <li>country:                             <ul style="list-style-type: none"> <li>Italy: first European country massively affected by the pandemic, first European lockdown</li> <li>Italy and Spain: mandatory confinement, measures starting to become less restrictive at T3</li> <li>Portugal: general duty of home confinement</li> </ul> </li> </ul>                                       | parent-report <ul style="list-style-type: none"> <li>psychological well-being via Impact Scale of COVID-19 and Children and Adolescents (anxiety, sleep, mood, behavioural disturbances)</li> </ul> | <ul style="list-style-type: none"> <li>Italy (harder restrictions):                             <ul style="list-style-type: none"> <li>increase in psychopathology (anxiety, negative mood, sleep problems, behavioural and cognitive disturbances) from T1 to T2</li> <li>decrease in anxiety and mood symptoms and increase in eating disturbances from T2 to T3</li> <li>increase in all symptoms from T1 to T3</li> <li>lower symptoms than Spain and Portugal at T1, higher symptoms than Spain and Portugal at T3</li> </ul> </li> <li>Spain (harder restrictions):                             <ul style="list-style-type: none"> <li>increase of anxiety from T1 to T2, then decrease in anxiety from T2 to T3</li> <li>no changes in other symptoms</li> </ul> </li> <li>Portugal (more liberal restrictions):                             <ul style="list-style-type: none"> <li>no changes in any symptom category over all waves</li> <li>lower symptoms than Italy and Spain at T3</li> </ul> </li> </ul> |
| 37. | Paschke et al. (2021) [70] | 04/2020 (lockdown)         | Germany                | <ul style="list-style-type: none"> <li><math>M = 13.6</math> years</li> <li>10–17 years</li> </ul> | 731 adolescent-parent-dyads             | <ul style="list-style-type: none"> <li>T1: 09/2019</li> <li>T2: 04/2020</li> </ul>                                                                                                       | <ul style="list-style-type: none"> <li>adolescents:                             <ul style="list-style-type: none"> <li>financial worries</li> <li>procrastination</li> <li>school attendance</li> <li>emotion regulation problems</li> </ul> </li> <li>parents:                             <ul style="list-style-type: none"> <li>confidence in parenting</li> <li>stress and emotion regulation problems</li> </ul> </li> </ul> | self-report <ul style="list-style-type: none"> <li>psychological stress via Perceived Stress Scale (PSS-4)</li> </ul>                                                                               | <ul style="list-style-type: none"> <li>increase in psychological stress in parents (29.7%) and adolescents (34.5%) from T1 to T2</li> <li>risk factors for stress: female gender, financial worries, parental stress, procrastination, limited access to emotion regulation strategies, mainly staying at home during confinement</li> <li>protective factor against stress: high emotional awareness</li> </ul>                                                                                                                                                                                                                                                                                                                                                                                                                                                                                                                                                                                                       |

| No. | Authors                   | Assessment during pandemic       | Country                  | $M_{Age}/Age$ range                                                                                 | $N$                                      | Waves of assessment                                                                                                               | COVID-19-related stressors/Other variables                                                                                                                                                       | Assessment of children's and adolescents' mental health                                                                                                                                                                                                                   | Main findings                                                                                                                                                                                                                                                                                                                                                                                                                                                                                                                                                                                                                                                                                                                                                                                                  |
|-----|---------------------------|----------------------------------|--------------------------|-----------------------------------------------------------------------------------------------------|------------------------------------------|-----------------------------------------------------------------------------------------------------------------------------------|--------------------------------------------------------------------------------------------------------------------------------------------------------------------------------------------------|---------------------------------------------------------------------------------------------------------------------------------------------------------------------------------------------------------------------------------------------------------------------------|----------------------------------------------------------------------------------------------------------------------------------------------------------------------------------------------------------------------------------------------------------------------------------------------------------------------------------------------------------------------------------------------------------------------------------------------------------------------------------------------------------------------------------------------------------------------------------------------------------------------------------------------------------------------------------------------------------------------------------------------------------------------------------------------------------------|
| 38. | Pelham et al. (2021) [27] | 05–08/2020 (stay-at-home orders) | United States of America | <ul style="list-style-type: none"> <li><math>M = 12.4</math> years</li> <li>10–15 years</li> </ul>  | 7,842 adolescents and their parents      | <ul style="list-style-type: none"> <li>T1: 2018–01/2020</li> <li>T2: 05/2020</li> <li>T3: 06/2020</li> <li>T4: 08/2020</li> </ul> | <ul style="list-style-type: none"> <li>parents' substance use</li> <li>pre-existing internalising or externalising problems</li> <li>worry, stress, material hardship due to pandemic</li> </ul> | self-report <ul style="list-style-type: none"> <li>past-30-day substance use</li> <li>anxiety and depressive symptoms via Patient-Reported Outcomes Measurement Information System (PROMIS)</li> <li>stress during past month via Perceived Stress Scale (PSS)</li> </ul> | <ul style="list-style-type: none"> <li>decrease in use of alcohol from T1 to T2–4</li> <li>increase in use of nicotine and misuse of prescription drugs from T1 to T2–4</li> <li>no changes in substance use from T2 to T4</li> <li>8.0% of youth reported use of any substance, typically only one substance and primarily episodic use</li> <li>risk factors for substance use:                             <ul style="list-style-type: none"> <li>pre-pandemic externalising symptoms</li> <li>stress, depression, and anxiety during pandemic</li> <li>pandemic-related uncertainty, material hardship, parents' use of alcohol or drugs</li> <li>associations between risk factors and substance abuse stronger in older adolescents</li> </ul> </li> <li>no effects of sex and race/ethnicity</li> </ul> |
| 39. | Penner et al. (2021) [71] | 04–06/2020 (stay-at-home orders) | United States of America | <ul style="list-style-type: none"> <li><math>M = 11.99</math> years</li> <li>10–14 years</li> </ul> | 322 adolescents (mainly Hispanic/Latinx) | <ul style="list-style-type: none"> <li>T1: 01/2020</li> <li>T2-4: 04–06/2020</li> </ul>                                           | <ul style="list-style-type: none"> <li>effects of the COVID-19 pandemic at home (e.g., financial, physical contact, access to food, stress, family functioning)</li> </ul>                       | self-report <ul style="list-style-type: none"> <li>internalising problems, attention problems, externalising problems via Brief Problem Monitor (BPM)</li> </ul>                                                                                                          | <ul style="list-style-type: none"> <li>statistically and clinically significant decrease in externalising symptoms from T1 to T2 only in adolescents with elevated mental health problems at T1</li> <li>statistically but not clinically significant decrease in internalising and total problems from T1 to T2 in whole sample</li> <li>no change in attention problems from T1 to T2 in whole sample</li> <li>protective factor against mental health symptoms: better family functioning</li> </ul>                                                                                                                                                                                                                                                                                                        |

| No. | Authors                | Assessment during pandemic | Country | $M_{Age}$ /Age range | <i>N</i>                                     | Waves of assessment                                                                    | COVID-19-related stressors/Other variables | Assessment of children's and adolescents' mental health                                                                                                                                                                                    | Main findings                                                                                                                                                                                                                                                                                                                                                                                                                                                                                                                                                                        |
|-----|------------------------|----------------------------|---------|----------------------|----------------------------------------------|----------------------------------------------------------------------------------------|--------------------------------------------|--------------------------------------------------------------------------------------------------------------------------------------------------------------------------------------------------------------------------------------------|--------------------------------------------------------------------------------------------------------------------------------------------------------------------------------------------------------------------------------------------------------------------------------------------------------------------------------------------------------------------------------------------------------------------------------------------------------------------------------------------------------------------------------------------------------------------------------------|
| 40. | Qin et al. (2021) [72] | 04/2020 (lockdown)         | China   | • 13–16 years        | 254 adolescents (high socio-economic status) | <ul style="list-style-type: none"> <li>• T1: 10/2019</li> <li>• T2: 04/2020</li> </ul> |                                            | self-report<br><ul style="list-style-type: none"> <li>• anxiety (learning anxiety, loneliness anxiety, self-blaming, sensitivity, personal anxiety, phobia, somatic anxiety, impulsive tendencies) via Mental Health Test (MHT)</li> </ul> | <ul style="list-style-type: none"> <li>• increase in number of adolescents with poor mental health from T1 to T2 (12.3% to 24.2%)</li> <li>• increase in learning anxiety, sensitivity tendency, somatic anxiety, phobia tendency</li> <li>• no change in personal anxiety, loneliness anxiety, self-blaming tendency, and impulsive tendency</li> <li>• risk factors for poor mental health: no siblings, living in stem family, risk of contracting COVID-19 from family members</li> <li>• protective factor against poor mental health: exercising for minimum 1h/day</li> </ul> |

| No. | Authors                            | Assessment during pandemic                                                         | Country        | $M_{Age}/Age$ range                                                                                            | $N$                                                                                                | Waves of assessment                                                                                                                          | COVID-19-related stressors/Other variables                                                                                                                                    | Assessment of children's and adolescents' mental health                                                                                                                                                                                                                                                                                                                                                                                                                                                                                                                                                                                                                   | Main findings                                                                                                                                                                                                                                                                                                                                                                                                                                                                                                                                                                                                                                                                                                                                                                                                                                                                                                                                 |
|-----|------------------------------------|------------------------------------------------------------------------------------|----------------|----------------------------------------------------------------------------------------------------------------|----------------------------------------------------------------------------------------------------|----------------------------------------------------------------------------------------------------------------------------------------------|-------------------------------------------------------------------------------------------------------------------------------------------------------------------------------|---------------------------------------------------------------------------------------------------------------------------------------------------------------------------------------------------------------------------------------------------------------------------------------------------------------------------------------------------------------------------------------------------------------------------------------------------------------------------------------------------------------------------------------------------------------------------------------------------------------------------------------------------------------------------|-----------------------------------------------------------------------------------------------------------------------------------------------------------------------------------------------------------------------------------------------------------------------------------------------------------------------------------------------------------------------------------------------------------------------------------------------------------------------------------------------------------------------------------------------------------------------------------------------------------------------------------------------------------------------------------------------------------------------------------------------------------------------------------------------------------------------------------------------------------------------------------------------------------------------------------------------|
| 41. | Ravens-Sieberer et al. (2021) [28] | 05-06/2020 (loosening of restrictions after lockdown) & 12/2020–01/2021 (lockdown) | Germany        | <ul style="list-style-type: none"> <li><math>M_{T1-T2} = 12.67</math> years</li> <li>7–17 years</li> </ul>     | <ul style="list-style-type: none"> <li>T0: 1,556 families</li> <li>T1–2: 1,923 families</li> </ul> | <ul style="list-style-type: none"> <li>T0: 2017 (data from different sample)</li> <li>T1: 05–06/2020</li> <li>T2: 12/2020–01/2021</li> </ul> | <ul style="list-style-type: none"> <li>parental mental health</li> <li>family resources/climate</li> <li>social support</li> </ul>                                            | parent-report for <11-year-olds, self-report for 11–17-year-olds <ul style="list-style-type: none"> <li>health-related quality of life via KIDSCREEN-10</li> <li>emotional symptoms, conduct problems, peer problems and hyperactivity via Strengths and Difficulties Questionnaire (SDQ)</li> <li>anxiety symptoms via Screen for Child Anxiety Related Emotional Disorders (SCARED)</li> <li>depressive symptoms via Center for Epidemiological Studies Depression Scale (CES-DC) and Patient Health Questionnaire (PHQ-2)</li> <li>psychosomatic complaints via Health Behavior in School-Aged Children Symptom Checklist 2017 symptom checklist (HBSC-SCL)</li> </ul> | <ul style="list-style-type: none"> <li>decrease in mental health (increase in anxiety, depression, psychosomatic problems) and health-related quality of life from T0 to T1 and T2 (17.6% suffering from mental health problems at T0 vs. 30.9% at T2), i.e., increase in symptoms from before to during the pandemic</li> <li>decrease in health-related quality of life from T1 to T2, i.e., over the course of the pandemic</li> <li>no change in global symptoms and conduct problems from T1 to T2</li> <li>increase in emotional problems, peer-related mental health problems, anxiety, depressive and psychosomatic symptoms from T1 to T2</li> <li>decrease in hyperactivity from T1 to T2</li> <li>risk factors for mental health problems: social disadvantage, mentally burdened parents</li> <li>protective factors against mental health problems: female gender, older age, positive family climate, social support</li> </ul> |
| 42. | Raw et al. (2021) [35]             | 03–07/2020 (lockdown to loosening of restrictions)                                 | United Kingdom | <ul style="list-style-type: none"> <li><math>M_{T1-T4} = 9.12-9.25</math> years</li> <li>4–16 years</li> </ul> | 2,988 caregivers                                                                                   | <ul style="list-style-type: none"> <li>T1: 03–04/2020</li> <li>T2: 04–05/2020</li> <li>T3: 06/2020</li> <li>T4: 07/2020</li> </ul>           | <ul style="list-style-type: none"> <li>psychological distress of caregiver</li> <li>special educational needs, neurodevelopmental disorder</li> <li>family support</li> </ul> | caregiver-report <ul style="list-style-type: none"> <li>emotional symptoms, conduct problems, peer problems, hyperactivity and prosocial behaviour via Strengths and Difficulties Questionnaire (SDQ)</li> </ul>                                                                                                                                                                                                                                                                                                                                                                                                                                                          | <ul style="list-style-type: none"> <li>increase in levels of hyperactivity and conduct problems from T1 to T4</li> <li>no change in emotional symptoms from T1 to T3, decrease between T3 and T4</li> <li>risk factors for elevated symptoms: caregiver psychological distress, special educational needs, neurodevelopmental disorder, younger age</li> </ul>                                                                                                                                                                                                                                                                                                                                                                                                                                                                                                                                                                                |

| No. | Authors                   | Assessment during pandemic                         | Country                  | $M_{Age}/Age$ range                                                                                 | $N$                                                                     | Waves of assessment                                                                                                                                                                                                                                      | COVID-19-related stressors/Other variables                                                                                                                                                                                                                                                                                                                   | Assessment of children's and adolescents' mental health                                                                                                                                                                                                                                                     | Main findings                                                                                                                                                                                                                                                                                                                                                                                                                                                                                                                                                  |
|-----|---------------------------|----------------------------------------------------|--------------------------|-----------------------------------------------------------------------------------------------------|-------------------------------------------------------------------------|----------------------------------------------------------------------------------------------------------------------------------------------------------------------------------------------------------------------------------------------------------|--------------------------------------------------------------------------------------------------------------------------------------------------------------------------------------------------------------------------------------------------------------------------------------------------------------------------------------------------------------|-------------------------------------------------------------------------------------------------------------------------------------------------------------------------------------------------------------------------------------------------------------------------------------------------------------|----------------------------------------------------------------------------------------------------------------------------------------------------------------------------------------------------------------------------------------------------------------------------------------------------------------------------------------------------------------------------------------------------------------------------------------------------------------------------------------------------------------------------------------------------------------|
| 43. | Rogers et al. (2021) [73] | 04/2020 (stay-at-home orders)                      | United States of America | <ul style="list-style-type: none"> <li><math>M = 15.24</math> years</li> <li>14–17 years</li> </ul> | 407 adolescents                                                         | <ul style="list-style-type: none"> <li>T1: 10/2019</li> <li>T2: 04/2020</li> </ul>                                                                                                                                                                       | <ul style="list-style-type: none"> <li>loneliness</li> </ul>                                                                                                                                                                                                                                                                                                 | self-report <ul style="list-style-type: none"> <li>mood via Positive and Negative Affect Schedule (PANAS)</li> <li>depressive symptoms via Children's Depression Inventory Short Version (CDI:S)</li> <li>anxiety symptoms via Generalized Anxiety Disorder Scale (GAD-7)</li> </ul>                        | <ul style="list-style-type: none"> <li>increase in negative affect and decrease in positive affect from T1 to T2</li> <li>increase in depression, anxiety, and loneliness from T1 to T2 (low mean levels of mental health problems)</li> </ul>                                                                                                                                                                                                                                                                                                                 |
| 44. | Romm et al. (2021) [74]   | 03–08/2020 (lockdown to loosening of restrictions) | United States of America | <ul style="list-style-type: none"> <li><math>M = 15.09</math> years</li> <li>14–16 years</li> </ul> | 208 adolescents (T3 for 123 before 13/03/2022, for 85 after 12/04/2022) | <ul style="list-style-type: none"> <li>T1-T2: 03/2019–03/2020</li> <li>T3: 03–08/2020                             <ul style="list-style-type: none"> <li>o until 13/03: pre-COVID-19 group</li> <li>o after 12/04: COVID-19 group</li> </ul> </li> </ul> | <ul style="list-style-type: none"> <li>friendship and isolation</li> <li>emotion regulation strategies:                             <ul style="list-style-type: none"> <li>o reappraisal and suppression of positive affect</li> <li>o savouring and dampening of positive affect</li> <li>o eudemonic and hedonic well-being motives</li> </ul> </li> </ul> | self-report <ul style="list-style-type: none"> <li>depressive symptoms via Children's Depression Inventory (CDI-2)</li> <li>positive and negative affect via Positive and Negative Affect Schedule-Short Form (PANAS-SF)</li> <li>life satisfaction via Students' Life Satisfaction Scale (SLSS)</li> </ul> | <ul style="list-style-type: none"> <li>increase in depressive symptoms, negative affect, and isolation from T1 and T2 to T3 only for adolescents in the COVID-19 group</li> <li>decrease in positive affect and friendship from T1 and T2 to T3 only for adolescents in the COVID-19 group</li> <li>no difference in life satisfaction between COVID-19 group and non-exposed group</li> <li>risk factors for increased symptoms: dampening positive emotions</li> <li>protective factors against increased symptoms: eudemonic and hedonic motives</li> </ul> |

| No. | Authors                  | Assessment during pandemic                                          | Country                  | $M_{Age}/Age$ range                                                                                       | $N$                                               | Waves of assessment                                                                                                                                                                                                               | COVID-19-related stressors/Other variables                                                                                                                                                                                              | Assessment of children's and adolescents' mental health                                                                                                                                                                                                                                                                                                         | Main findings                                                                                                                                                                                                                                                                                                                                                                                                                                                                                  |
|-----|--------------------------|---------------------------------------------------------------------|--------------------------|-----------------------------------------------------------------------------------------------------------|---------------------------------------------------|-----------------------------------------------------------------------------------------------------------------------------------------------------------------------------------------------------------------------------------|-----------------------------------------------------------------------------------------------------------------------------------------------------------------------------------------------------------------------------------------|-----------------------------------------------------------------------------------------------------------------------------------------------------------------------------------------------------------------------------------------------------------------------------------------------------------------------------------------------------------------|------------------------------------------------------------------------------------------------------------------------------------------------------------------------------------------------------------------------------------------------------------------------------------------------------------------------------------------------------------------------------------------------------------------------------------------------------------------------------------------------|
| 45. | Rosen et al. (2021) [36] | 04–05/2020 (stay-at-home orders, school closures) & 11/2020–01/2021 | United States of America | <ul style="list-style-type: none"> <li><math>M = 12.65</math> years</li> <li>7-10; 13–15 years</li> </ul> | 224 children and adolescents and their caregivers | <ul style="list-style-type: none"> <li>T1: 01/2016–09/2017 (younger children) &amp; 06/2017-10/2018 (adolescents)</li> <li>T2: 03–11/2018 (younger children only)</li> <li>T3: 04–05/2020</li> <li>T4: 11/2020–01/2021</li> </ul> | <ul style="list-style-type: none"> <li>financial, social, school, and physical pandemic-related stressors</li> <li>potential protective factors, e.g., physical activity, time spent in nature, screen time, family routines</li> </ul> | parent-report <ul style="list-style-type: none"> <li>emotional and behavioural problems via Child Behavior Checklist (CBCL) and via Strengths and Difficulties Questionnaire (SDQ)</li> <li>self-report (adolescents)</li> <li>emotional and behavioural problems via Youth Self Report (YSR) and via Strengths and Difficulties Questionnaire (SDQ)</li> </ul> | <ul style="list-style-type: none"> <li>increase in internalising and externalising symptoms from T1 and T2 to T3 and T4</li> <li>risk factors for increased symptoms: exposure to pandemic-related stressors, pre-pandemic symptoms</li> <li>protective factors against increased psychopathology and effect of pandemic-related stress factors: structured routine, less passive screen time, lower exposure to news media about the pandemic, more time in nature, adequate sleep</li> </ul> |
| 46. | Shi et al. (2021) [75]   | 06–07/2020 (re-opening of schools)                                  | China                    | <ul style="list-style-type: none"> <li><math>M = 11.74</math> years</li> <li>7–17 years</li> </ul>        | 7,958 adolescents                                 | <ul style="list-style-type: none"> <li>T1: 12/2019–01/2020</li> <li>T2: 06–07/2020</li> </ul>                                                                                                                                     | <ul style="list-style-type: none"> <li>emotional competence</li> <li>COVID-19 exposure</li> </ul>                                                                                                                                       | self-report <ul style="list-style-type: none"> <li>depression via Center for Epidemiological Studies Depression Scale for Children (CES-DC)</li> <li>anxiety via Screen for Child Anxiety Related Emotional Disorders (SCARED)</li> </ul>                                                                                                                       | <ul style="list-style-type: none"> <li>decrease of depression and anxiety from T1 to T2 (38.67% to 36.74%; 13.02% to 12.77%)</li> <li>emotional competence at T2 as a mediator of effect of COVID-19 exposure on anxiety and depression at T2, i.e., emotional competence had a negative effect on anxiety and depression at T2</li> </ul>                                                                                                                                                     |



| No. | Authors                      | Assessment during pandemic                     | Country | $M_{Age}/Age$ range                                                                                   | $N$                            | Waves of assessment                                                                | COVID-19-related stressors/Other variables                                                                                                       | Assessment of children's and adolescents' mental health                                                                                                                                                                                                                                                                              | Main findings                                                                                                                                                                                                                                                                                                                                                                                                                                                                                                                         |
|-----|------------------------------|------------------------------------------------|---------|-------------------------------------------------------------------------------------------------------|--------------------------------|------------------------------------------------------------------------------------|--------------------------------------------------------------------------------------------------------------------------------------------------|--------------------------------------------------------------------------------------------------------------------------------------------------------------------------------------------------------------------------------------------------------------------------------------------------------------------------------------|---------------------------------------------------------------------------------------------------------------------------------------------------------------------------------------------------------------------------------------------------------------------------------------------------------------------------------------------------------------------------------------------------------------------------------------------------------------------------------------------------------------------------------------|
| 47. | Shoshani and Kor (2021) [76] | 05/2020 (re-opening of schools after lockdown) | Israel  | <ul style="list-style-type: none"> <li><math>M = 13.97</math> years</li> <li>11.1–17 years</li> </ul> | 1,537 children and adolescents | <ul style="list-style-type: none"> <li>T1: 09/2019</li> <li>T2: 05/2020</li> </ul> | <ul style="list-style-type: none"> <li>daily screen time</li> <li>perceived social support</li> <li>daily routines</li> <li>gratitude</li> </ul> | self-report <ul style="list-style-type: none"> <li>anxiety, somatization, panic, and depression via Brief Symptom Inventory-18 (BSI-18)</li> <li>affect via Positive and Negative Affect Schedule for Children (PANAS-C)</li> <li>life satisfaction via Brief Multidimensional Students' Life Satisfaction Scale (BMSLSS)</li> </ul> | <ul style="list-style-type: none"> <li>increase in anxiety, depression and panic symptoms, video gaming, Internet and TV screen time use from T1 to T2</li> <li>no change in negative affect from T1 to T2</li> <li>decrease in positive emotions, life satisfaction, social media use and peer support from T1 to T2</li> <li>risk factor for mental health problems: higher mental health symptoms at T1</li> <li>protective factors against mental health problems: consistent daily routines, perceived social support</li> </ul> |

| No. | Authors                                                                            | Assessment during pandemic | Country        | $M_{Age}/Age$ range                                                                                         | $N$                                 | Waves of assessment                                                                                                       | COVID-19-related stressors/Other variables                                                                                             | Assessment of children's and adolescents' mental health                                                                                                                                                                                                                                                                                                                                                                        | Main findings                                                                                                                                                                                                                                                                                                                                                                                                                                                                                                                                                                                                                                                                                                                                                                                                                                                                                                                                       |
|-----|------------------------------------------------------------------------------------|----------------------------|----------------|-------------------------------------------------------------------------------------------------------------|-------------------------------------|---------------------------------------------------------------------------------------------------------------------------|----------------------------------------------------------------------------------------------------------------------------------------|--------------------------------------------------------------------------------------------------------------------------------------------------------------------------------------------------------------------------------------------------------------------------------------------------------------------------------------------------------------------------------------------------------------------------------|-----------------------------------------------------------------------------------------------------------------------------------------------------------------------------------------------------------------------------------------------------------------------------------------------------------------------------------------------------------------------------------------------------------------------------------------------------------------------------------------------------------------------------------------------------------------------------------------------------------------------------------------------------------------------------------------------------------------------------------------------------------------------------------------------------------------------------------------------------------------------------------------------------------------------------------------------------|
| 48. | Shum et al. (2021) [37]                                                            | 03/2020–03/2021            | United Kingdom | <ul style="list-style-type: none"> <li>• <math>M_{T1}</math> = 13.37 years</li> <li>• 4–17 years</li> </ul> | 8,752 caretakers, 1,284 adolescents | <ul style="list-style-type: none"> <li>• T1: 03/2020</li> <li>• T2–11: monthly reports</li> <li>• T12: 03/2021</li> </ul> | <ul style="list-style-type: none"> <li>• household income</li> <li>• neurodevelopmental disorder, special educational needs</li> </ul> | <ul style="list-style-type: none"> <li>• caregiver-report</li> <li>• emotional symptoms, conduct problems and hyperactivity via Strengths and Difficulties Questionnaire (SDQ) self-report (adolescents)</li> <li>• emotional symptoms, conduct problems and hyperactivity via Strengths and Difficulties Questionnaire (SDQ)</li> <li>• global distress, depressive and anxiety symptoms via Kessler 6 scale (K-6)</li> </ul> | <ul style="list-style-type: none"> <li>• sharp decrease in behavioural, emotional, and attentional difficulties since 02/2021 (ease of restrictions)</li> <li>• no reductions of symptoms in children with neurodevelopmental disorders or special educational needs and children from low-income households</li> <li>• highest level of behavioural, emotional, and attentional difficulties in 06/2020 and 02/2021 (highest restrictions)</li> <li>• possible/probable cases of clinically relevant psychopathology in 06/2020 and 02/2021: 20.4–21.7% behavioural, 22.3–24.2% emotional, 28.6–29.4% attentional</li> <li>• younger children showed greater changes in levels of psychological difficulties than older children/adolescents</li> <li>• no gender differences in patterns of symptomology over time, higher levels of attentional problems reported for boys and higher levels of emotional problems reported for girls</li> </ul> |
| 49. | Skripkauskaitė et al. (2021) [38]<br><br>(same project as Shum et al. (2021) [37]) | 03/2020–06/2021            | United Kingdom | <ul style="list-style-type: none"> <li>• <math>M_{T1}</math> = 13.37 years</li> <li>• 4–18 years</li> </ul> | 9,161 caretakers                    | <ul style="list-style-type: none"> <li>• T1: 03/2020</li> <li>• T2–14: monthly reports</li> <li>• T15: 06/2020</li> </ul> | <ul style="list-style-type: none"> <li>• household income</li> <li>• neurodevelopmental disorder, special educational needs</li> </ul> | <ul style="list-style-type: none"> <li>• caregiver-report</li> <li>• emotional symptoms, conduct problems and hyperactivity via Strengths and Difficulties Questionnaire (SDQ)</li> </ul>                                                                                                                                                                                                                                      | <ul style="list-style-type: none"> <li>• see: Shum et al., 2021</li> <li>• no change in behavioural, emotional, and attentional difficulties between 04 and 06/2021</li> <li>• possible/probable cases of clinically relevant psychopathology in 06/2021: 19.5% behavioural, 21.8% emotional, 24.1% attentional</li> </ul>                                                                                                                                                                                                                                                                                                                                                                                                                                                                                                                                                                                                                          |

| No. | Authors                    | Assessment during pandemic | Country                  | $M_{Age}/Age$ range                                                                                    | $N$                                                  | Waves of assessment                                                                                | COVID-19-related stressors/Other variables                                                                                                                                                                                                                                                             | Assessment of children's and adolescents' mental health                                                                                                                                                                                                       | Main findings                                                                                                                                                                                                                                                                                                                                                                                                                                                                                                        |
|-----|----------------------------|----------------------------|--------------------------|--------------------------------------------------------------------------------------------------------|------------------------------------------------------|----------------------------------------------------------------------------------------------------|--------------------------------------------------------------------------------------------------------------------------------------------------------------------------------------------------------------------------------------------------------------------------------------------------------|---------------------------------------------------------------------------------------------------------------------------------------------------------------------------------------------------------------------------------------------------------------|----------------------------------------------------------------------------------------------------------------------------------------------------------------------------------------------------------------------------------------------------------------------------------------------------------------------------------------------------------------------------------------------------------------------------------------------------------------------------------------------------------------------|
| 50. | Specht et al. (2021) [77]  | 04/2020 (lockdown)         | Denmark                  | <ul style="list-style-type: none"> <li><math>M = 5.0</math> years</li> <li>3.5–6.8 years</li> </ul>    | 40 parents                                           | <ul style="list-style-type: none"> <li>T1: 01-02/2020</li> <li>T2: 04/2020</li> </ul>              | <ul style="list-style-type: none"> <li>leisure time activities</li> </ul>                                                                                                                                                                                                                              | caregiver-report <ul style="list-style-type: none"> <li>externalising (conduct problems and hyperactivity), internalising symptoms (emotional symptoms, peer problems), and prosocial behaviour via Strengths and Difficulties Questionnaire (SDQ)</li> </ul> | <ul style="list-style-type: none"> <li>increase in total difficulty score and externalising symptoms (i.e., hyperactivity) from T1 to T2</li> <li>no change in internalising symptoms (i.e., emotional symptoms and peer problems) and conduct problems from T1 to T2</li> <li>decrease of prosocial behaviour from T1 to T2</li> <li>risk factor for mental health problems at T2: attending leisure time activities prior to lockdown</li> </ul>                                                                   |
| 51. | Spencer et al. (2021) [78] | 08/2020–01/2021            | United States of America | <ul style="list-style-type: none"> <li><math>M = 8.5</math> years</li> <li>5–11 years at T1</li> </ul> | 168 caregivers (mostly racial and ethnic minorities) | <ul style="list-style-type: none"> <li>T1: 09/2019–03/2020</li> <li>T2: 08/2020–01/2021</li> </ul> | <ul style="list-style-type: none"> <li>social risks (e.g., food and housing insecurity, unemployment, medication affordability)</li> <li>caregiver mental health</li> <li>COVID-19-related stressors (e.g., remote school assignments, exposure to COVID-19-related media, screen time use)</li> </ul> | caregiver-report <ul style="list-style-type: none"> <li>attention, internalising and externalising symptoms via Paediatric Symptom Checklist (PSC-17)</li> </ul>                                                                                              | <ul style="list-style-type: none"> <li>increase in total score from T1 to T2 (increase in overall risk of mental health problems from 8% to 18%)</li> <li>increase in attention, internalizing and externalising symptoms from T1 to T2 (increase in clinically relevant internalising symptoms from 5% to 18%)</li> <li>factors associated with increased mental health symptoms: number of social risks before pandemic, less school assignment completion, increased screen time, caregiver depression</li> </ul> |

| No. | Authors                         | Assessment during pandemic                          | Country     | $M_{Age}/Age$ range                                                                                       | $N$                            | Waves of assessment                                                                          | COVID-19-related stressors/Other variables                                                              | Assessment of children's and adolescents' mental health                                                                                                                                                                                                                                                             | Main findings                                                                                                                                                                                                                                                                                                                                                                                                                                                                                                                                                                                                                          |
|-----|---------------------------------|-----------------------------------------------------|-------------|-----------------------------------------------------------------------------------------------------------|--------------------------------|----------------------------------------------------------------------------------------------|---------------------------------------------------------------------------------------------------------|---------------------------------------------------------------------------------------------------------------------------------------------------------------------------------------------------------------------------------------------------------------------------------------------------------------------|----------------------------------------------------------------------------------------------------------------------------------------------------------------------------------------------------------------------------------------------------------------------------------------------------------------------------------------------------------------------------------------------------------------------------------------------------------------------------------------------------------------------------------------------------------------------------------------------------------------------------------------|
| 52. | Teng et al. (2021) [79]         | 04–05/2020 (stay-at-home orders)                    | China       | <ul style="list-style-type: none"> <li>• grade 4 and 7</li> <li>• ~ 9–10 years and 12–13 years</li> </ul> | 1,778 children and adolescents | <ul style="list-style-type: none"> <li>• T1: 10–11/2019</li> <li>• T2: 04–05/2020</li> </ul> | <ul style="list-style-type: none"> <li>• perceived COVID-19 impacts</li> <li>• videogame use</li> </ul> | self-report <ul style="list-style-type: none"> <li>• Internet Gaming Disorder via Internet Gaming Disorder Scale-Short Form (IGDS9-SF)</li> <li>• depressive symptoms via Center for Epidemiologic Studies Depression Scale (CES-D)</li> <li>• anxiety symptoms via State-Trait Anxiety Inventory (STAI)</li> </ul> | <ul style="list-style-type: none"> <li>• increase in videogame use and anxiety from T1 to T2 in total sample</li> <li>• no change in depressive symptoms from T1 to T2 in total sample</li> <li>• increase in Internet Gaming Disorder from T1 to T2 only in adolescents</li> <li>• no change in anxiety and Internet Gaming Disorder from T1 to T2 in children</li> <li>• depressive and anxiety symptoms at T1 predicted Internet Gaming Disorder and videogame use at T2 (mediated by perceived COVID-19 impacts)</li> </ul>                                                                                                        |
| 53. | van der Laan et al. (2021) [80] | 04/2020 (five weeks after introduction of lockdown) | Netherlands | <ul style="list-style-type: none"> <li>• <math>M = 15.53</math> years</li> <li>• 12–16 years</li> </ul>   | 158 adolescents                | <ul style="list-style-type: none"> <li>• T1: 03/2019</li> <li>• T2: 04/2020</li> </ul>       | <ul style="list-style-type: none"> <li>• concerns about COVID-19</li> </ul>                             | self-report <ul style="list-style-type: none"> <li>• life satisfaction via Cantril Ladder</li> <li>• internalising symptoms via Revised Child Anxiety and Depression Scale (RCADS)</li> <li>• psychosomatic health via Health Behavior in School-Aged Children Symptom Checklist 2017 (HBSC)</li> </ul>             | <ul style="list-style-type: none"> <li>• decrease in life satisfaction from T1 to T2</li> <li>• increase in psychosomatic health from T1 to T2</li> <li>• no change in internalising symptoms from T1 to T2</li> <li>• gender as a moderating factor:                             <ul style="list-style-type: none"> <li>○ higher life satisfaction and psychosomatic health, and lower internalising symptoms in boys than in girls at T1 and T2</li> <li>○ decrease in life satisfaction from T1 to T2 only in boys, not in girls</li> </ul> </li> <li>• risk factor for lower life satisfaction: concerns about COVID-19</li> </ul> |

| No. | Authors                    | Assessment during pandemic                                                   | Country                  | $M_{Age}/Age$ range                                                                                                                          | $N$             | Waves of assessment                                                                                          | COVID-19-related stressors/Other variables                                                                                                                                                                        | Assessment of children's and adolescents' mental health                                                                                                                                                                                                                                                        | Main findings                                                                                                                                                                                                                                                                                                                                                                                                                                                                               |
|-----|----------------------------|------------------------------------------------------------------------------|--------------------------|----------------------------------------------------------------------------------------------------------------------------------------------|-----------------|--------------------------------------------------------------------------------------------------------------|-------------------------------------------------------------------------------------------------------------------------------------------------------------------------------------------------------------------|----------------------------------------------------------------------------------------------------------------------------------------------------------------------------------------------------------------------------------------------------------------------------------------------------------------|---------------------------------------------------------------------------------------------------------------------------------------------------------------------------------------------------------------------------------------------------------------------------------------------------------------------------------------------------------------------------------------------------------------------------------------------------------------------------------------------|
| 54. | Vira and Skoog (2021) [81] | 11/2020–02/2021<br>(schools up to grade 6 remained open during the pandemic) | Sweden                   | <ul style="list-style-type: none"> <li><math>M_{T1} = 10</math> years</li> <li><math>M_{T2} = 11</math> years</li> <li>9–12 years</li> </ul> | 849 children    | <ul style="list-style-type: none"> <li>T1: 10/2019–01/2020</li> <li>T2: 11/2020–02/2021</li> </ul>           | <ul style="list-style-type: none"> <li>relationships to others (social support through parents and friends)</li> <li>school adjustment (social support through teachers, school, and class well-being)</li> </ul> | self-report <ul style="list-style-type: none"> <li>emotional problems via Strengths and Difficulties Questionnaire (SDQ)</li> <li>sense of hope via Children's Hope Scale (CHS)</li> <li>self-efficacy via Children's Self-Efficacy Scale (CSES)</li> <li>self-esteem via Self-Esteem Scale (S/SE)</li> </ul>  | <ul style="list-style-type: none"> <li>negligible decrease in psychological adjustment (i.e., sense of hope, self-efficacy, self-esteem, and emotional problems) from T1 to T2</li> <li>no changes in emotional problems from T1 to T2</li> <li>decrease in school adjustment from T1 to T2 (slightly less social support by teachers, slightly less well-being at school)</li> <li>no changes in relationship to others from T1 to T2</li> </ul>                                           |
| 55. | Walters et al. (2021) [82] | 11/2020 (most schools offering hybrid instruction (remote and in-person))    | United States of America | <ul style="list-style-type: none"> <li><math>M = 12.38</math> years</li> </ul>                                                               | 174 adolescents | <ul style="list-style-type: none"> <li>T1-T3: 2016–2018</li> <li>T4: 11/2019</li> <li>T5: 11/2020</li> </ul> | <ul style="list-style-type: none"> <li>neutralizing beliefs</li> <li>bullying victimization and perpetration</li> <li>parental support and knowledge</li> </ul>                                                   | self-report <ul style="list-style-type: none"> <li>depression via 5-item Center for Epidemiological Studies Depression Scale (CES-D)</li> <li>cognitive impulsivity via Weinberger Adjustment Inventory Impulse Control Scale (WAI-IC)</li> <li>delinquency via Self-Reported Offending Scale (SRO)</li> </ul> | <ul style="list-style-type: none"> <li>no changes in depression, cognitive impulsivity, delinquency, bullying victimization and perpetration, and parental knowledge from T4 to T5</li> <li>modest increase in neutralization beliefs, and small decrease in parental support from T4 to T5</li> <li>smaller changes from T4 to T5 than expected based on data from T1-T4 (i.e., decrease in parental support and knowledge, increase of delinquency and bullying victimisation)</li> </ul> |

| No. | Authors                   | Assessment during pandemic                                         | Country        | $M_{Age}/Age$ range                                                                                     | $N$                            | Waves of assessment                                                                               | COVID-19-related stressors/Other variables                                                                                                                                                                                                                                                                                                                                                                                                                                                                                 | Assessment of children's and adolescents' mental health                                                                                                                                                                                                                                                                                                                                                            | Main findings                                                                                                                                                                                                                                                                                                                                                                                                                                                                                                                                                                                                                                            |
|-----|---------------------------|--------------------------------------------------------------------|----------------|---------------------------------------------------------------------------------------------------------|--------------------------------|---------------------------------------------------------------------------------------------------|----------------------------------------------------------------------------------------------------------------------------------------------------------------------------------------------------------------------------------------------------------------------------------------------------------------------------------------------------------------------------------------------------------------------------------------------------------------------------------------------------------------------------|--------------------------------------------------------------------------------------------------------------------------------------------------------------------------------------------------------------------------------------------------------------------------------------------------------------------------------------------------------------------------------------------------------------------|----------------------------------------------------------------------------------------------------------------------------------------------------------------------------------------------------------------------------------------------------------------------------------------------------------------------------------------------------------------------------------------------------------------------------------------------------------------------------------------------------------------------------------------------------------------------------------------------------------------------------------------------------------|
| 56. | Wright et al. (2021) [83] | 06–08/2020 (re-opening after lockdown, social distancing measures) | United Kingdom | <ul style="list-style-type: none"> <li>• <math>M = 11.97</math> years</li> <li>• 10–12 years</li> </ul> | 202 children and their mothers | <ul style="list-style-type: none"> <li>• T1: 12/2019–02/2020</li> <li>• T2: 06–08/2020</li> </ul> | <ul style="list-style-type: none"> <li>• children's long-term vulnerability:                             <ul style="list-style-type: none"> <li>○ prior adjustment</li> <li>○ maternal prenatal depression</li> </ul> </li> <li>• neighbourhood deprivation</li> <li>• COVID-19-related experiences:                             <ul style="list-style-type: none"> <li>○ parent in frontline job</li> <li>○ financial difficulties during pandemic</li> <li>○ stressful events during the pandemic</li> </ul> </li> </ul> | parent- and self-report <ul style="list-style-type: none"> <li>• depression via Short Mood and Feelings Questionnaire (SMFQ)</li> <li>• PTSD via Child Trauma Symptom Scale</li> <li>parent-report                             <ul style="list-style-type: none"> <li>• anxiety via Short Spence Anxiety Scale (SCAS-S)</li> <li>• behavioural problems via Child Behavior Checklist (CBCL)</li> </ul> </li> </ul> | <ul style="list-style-type: none"> <li>• 44% increase in symptoms of depression from T1 to T2</li> <li>• 26% increase in post-traumatic stress disorder from T1 to T2</li> <li>• 76% increase in disruptive behaviour problems (particularly in children without previous externalising symptoms) from T1 to T2</li> <li>• no change in anxiety from T1 to T2</li> <li>• changes only in group of less deprived families</li> <li>• risk factors for depression at T2 and greater absolute increases from T1 to T2: female gender, higher internalising symptoms earlier in childhood</li> <li>• no influence of COVID-19 related experiences</li> </ul> |
| 57. | Wu et al. (2021) [84]     | 05/2020 (post-lockdown)                                            | China          | <ul style="list-style-type: none"> <li>• <math>M = 12.7</math> years</li> </ul>                         | 1,627 adolescents              | <ul style="list-style-type: none"> <li>• T1: 10/2019</li> <li>• T2: 05/2020</li> </ul>            |                                                                                                                                                                                                                                                                                                                                                                                                                                                                                                                            | self-report <ul style="list-style-type: none"> <li>• psychotic-like experiences, anxiety, depression via Mental Health Inventory of Middle School Students (MMHI-60)</li> </ul>                                                                                                                                                                                                                                    | <ul style="list-style-type: none"> <li>• increase in psychotic experiences, anxiety, and depression from T1 to T2</li> <li>• positive correlation between changes of psychotic experiences and changes in anxiety and depression</li> <li>• greatest exacerbation in anxiety and depression symptoms in group with new-onset psychotic experiences at T2 (16.7%)</li> </ul>                                                                                                                                                                                                                                                                              |

| No. | Authors                   | Assessment during pandemic | Country | $M_{Age}/Age$ range                                                                                | $N$                                              | Waves of assessment                                                                        | COVID-19-related stressors/Other variables                                               | Assessment of children's and adolescents' mental health                                                                                                       | Main findings                                                                                                                                                                                                                                                                                                                                                                                                                                    |
|-----|---------------------------|----------------------------|---------|----------------------------------------------------------------------------------------------------|--------------------------------------------------|--------------------------------------------------------------------------------------------|------------------------------------------------------------------------------------------|---------------------------------------------------------------------------------------------------------------------------------------------------------------|--------------------------------------------------------------------------------------------------------------------------------------------------------------------------------------------------------------------------------------------------------------------------------------------------------------------------------------------------------------------------------------------------------------------------------------------------|
| 58. | Wunsch et al. (2021) [85] | 04/2020 (lockdown)         | Germany | <ul style="list-style-type: none"> <li><math>M = 10.36</math> years</li> <li>4–17 years</li> </ul> | 1,711 children and adolescents and their parents | <ul style="list-style-type: none"> <li>T1: 08/2018–03/2020</li> <li>T2: 04/2020</li> </ul> | <ul style="list-style-type: none"> <li>physical activity</li> <li>screen time</li> </ul> | parent-report for <11 years, self-report for 11–17 years<br><ul style="list-style-type: none"> <li>health-related quality of life via KIDSCREEN-10</li> </ul> | <ul style="list-style-type: none"> <li>decrease in health-related quality of life from T1 to T2, relatively low scores compared to European norms</li> <li>increase of physical activity and screen time from T1 to T2</li> <li>physical activity and screen time at T1 not predictive of health-related quality of life at T2</li> <li>screen time and health-related quality of life at T1 as predictors of physical activity at T2</li> </ul> |

289 *Note.* This table summarises the main characteristics and findings of the longitudinal studies ( $n = 58$ ). The studies are sorted alphabetically  
 290 based on the first author's last name. Two studies listed here combined longitudinal (within-subjects) and repeated cross-sectional (between-  
 291 subjects) designs [27,28]. The studies of 37 [37] and [38] belong to the same longitudinal project and thus report partially on the same study  
 292 sample. Note that additional variables ("COVID-19-related stressors/Other variables") were summarised and the table does not provide a  
 293 complete record of all studied variables. As most studies collected demographic information like age, gender and socio-economic background,  
 294 these variables are not specifically listed as "other variables" in the table. If not specified otherwise, the depicted results include only findings  
 295 concerning children and adolescents. Findings concerning other age groups are mostly omitted.  
 296

297 **Table 2. Overview of Repeated Cross-Sectional Studies (Different Samples).**

| No. | Authors                                    | Assessment during pandemic                                | Country | $M_{Age}/Age$ range                                                                              | $N$                                                                                                                | Waves of assessment                                                                                       | COVID-19-related stressors/Other variables                                                                                              | Assessment of children's and adolescents' mental health symptoms                                                                                                                                                           | Main findings                                                                                                                                                                                                                                                                                                                                                                                                     |
|-----|--------------------------------------------|-----------------------------------------------------------|---------|--------------------------------------------------------------------------------------------------|--------------------------------------------------------------------------------------------------------------------|-----------------------------------------------------------------------------------------------------------|-----------------------------------------------------------------------------------------------------------------------------------------|----------------------------------------------------------------------------------------------------------------------------------------------------------------------------------------------------------------------------|-------------------------------------------------------------------------------------------------------------------------------------------------------------------------------------------------------------------------------------------------------------------------------------------------------------------------------------------------------------------------------------------------------------------|
| 59. | Burdzovic Andreas and Brunborg (2021) [86] | 10-12/2020 (implementation of stricter national policies) | Norway  | <ul style="list-style-type: none"> <li>grade 11</li> <li>~ 16 years</li> </ul>                   | adolescents<br><ul style="list-style-type: none"> <li>T1: 1,621</li> <li>T2: 915</li> </ul>                        | <ul style="list-style-type: none"> <li>T1: 10–12/2018 &amp; 10–12/2019</li> <li>T2: 10–12/2020</li> </ul> | <ul style="list-style-type: none"> <li>physical health</li> <li>participation in organized sports</li> <li>number of friends</li> </ul> | self-report<br><ul style="list-style-type: none"> <li>depression symptoms via Patient Health Questionnaire-9 (PHQ-9)</li> <li>pandemic anxiety via Pandemic Anxiety Scale (CPAS-11; only T2)</li> </ul>                    | <ul style="list-style-type: none"> <li>no differences in depression and physical health between T1 and T2</li> <li>17.3% reported high pandemic anxiety at T2</li> <li>adolescents with high pandemic anxiety showed higher depression symptoms, poorer physical health, and less participation in organized sports</li> </ul>                                                                                    |
| 60. | Dabravolskaj et al. (2021) [87]            | 11-12/2020 (post-lockdown, reopening of schools)          | Canada  | <ul style="list-style-type: none"> <li>grade 4–6</li> <li>9-12 years</li> </ul>                  | children<br><ul style="list-style-type: none"> <li>T1: 476</li> <li>T2: 467</li> </ul> (low socio-economic status) | <ul style="list-style-type: none"> <li>T1: spring 2018</li> <li>T2: 11–12/2020</li> </ul>                 |                                                                                                                                         | self-report<br><ul style="list-style-type: none"> <li>mental health and well-being via 12 questions about worries, unhappiness, sadness, relationships, schoolwork, self-confidence, feeling of belonging, etc.</li> </ul> | <ul style="list-style-type: none"> <li>no significant differences in well-being and mental health from T1 to T2</li> </ul>                                                                                                                                                                                                                                                                                        |
| 61. | Dollberg et al. (2021) [88]                | 03-04/2020 (lockdown)                                     | Israel  | <ul style="list-style-type: none"> <li><math>M = 4.17</math> years</li> <li>3–6 years</li> </ul> | mothers<br><ul style="list-style-type: none"> <li>T1: 87</li> <li>T2: 53</li> </ul>                                | <ul style="list-style-type: none"> <li>T1: pre-pandemic</li> <li>T2: 03–04/2020</li> </ul>                | <ul style="list-style-type: none"> <li>mothers' anxiety</li> <li>maternal mentalization/mind-mindedness</li> </ul>                      | parent-report<br><ul style="list-style-type: none"> <li>children's internalising and externalising behaviour via Child Behavior Checklist 1.5–5 (CBCL 1.5–5)</li> </ul>                                                    | <ul style="list-style-type: none"> <li>higher children's externalising and internalising behaviour, and higher maternal anxiety at T2 than at T1</li> <li>mothers' anxiety as mediator of the effect of pandemic on children's externalising and internalising symptoms</li> <li>mothers' mind-mindedness as moderator of the association between the pandemic and children's externalising behaviours</li> </ul> |



| No. | Authors                      | Assessment during pandemic           | Country        | $M_{Age}/Age$ range                                                                                                                                                                                 | $N$                                                                                                            | Waves of assessment                                                                                                    | COVID-19-related stressors/Other variables                                                                                                                                                                        | Assessment of children's and adolescents' mental health symptoms                                                                                                                                                                                                       | Main findings                                                                                                                                                                                                                                                                                                                                                                                                                                                                                      |
|-----|------------------------------|--------------------------------------|----------------|-----------------------------------------------------------------------------------------------------------------------------------------------------------------------------------------------------|----------------------------------------------------------------------------------------------------------------|------------------------------------------------------------------------------------------------------------------------|-------------------------------------------------------------------------------------------------------------------------------------------------------------------------------------------------------------------|------------------------------------------------------------------------------------------------------------------------------------------------------------------------------------------------------------------------------------------------------------------------|----------------------------------------------------------------------------------------------------------------------------------------------------------------------------------------------------------------------------------------------------------------------------------------------------------------------------------------------------------------------------------------------------------------------------------------------------------------------------------------------------|
| 62. | James et al. (2021) [89]     | 04–06/2020 (school closures)         | United Kingdom | <ul style="list-style-type: none"> <li>• <math>M_{T1}</math> = 10.3 years</li> <li>• <math>M_{T2}</math> = 10.27 years</li> <li>• <math>M_{T3}</math> = 9.99 years</li> <li>• 7–11 years</li> </ul> | children <ul style="list-style-type: none"> <li>• T1: 475</li> <li>• T2: 1,150</li> <li>• T3: 1,333</li> </ul> | <ul style="list-style-type: none"> <li>• T1: 04–06/2018</li> <li>• T2: 04–06/2019</li> <li>• T3: 04–06/2020</li> </ul> | <ul style="list-style-type: none"> <li>• physical activity</li> <li>• screen time</li> <li>• diet and dental health</li> <li>• competency and autonomy</li> <li>• socioeconomic deprivation</li> </ul>            | self-report <ul style="list-style-type: none"> <li>• well-being via study-intern questionnaire</li> <li>• emotional and behavioural difficulties via study-intern questionnaire</li> </ul>                                                                             | <ul style="list-style-type: none"> <li>• higher physical activity levels, sleep time, happiness, and general well-being at T3 than at T1 and T2</li> <li>• lower levels of emotional and behavioural symptoms at T3 than at T1 and T2</li> <li>• less school competence and physical health behaviours (healthy diet, physical activity) in socioeconomically deprived children than in children with a higher socio-economic status at T3</li> </ul>                                              |
| 63. | D. Kim and Lee (2021) [90]   | 11–12/2020 (partial school closures) | South Korea    | <ul style="list-style-type: none"> <li>• <math>M_{T1}</math> = 13.36 years</li> <li>• <math>M_{T2}</math> = 13.62 years</li> <li>• ~ 10–15 years</li> </ul>                                         | adolescents <ul style="list-style-type: none"> <li>• T1: 3,040</li> <li>• T2: 2,906</li> </ul>                 | <ul style="list-style-type: none"> <li>• T1: 11–12/2018</li> <li>• T2: 11–12/2020</li> </ul>                           | <ul style="list-style-type: none"> <li>• time spent playing games on the Internet</li> </ul>                                                                                                                      | self-report <ul style="list-style-type: none"> <li>• Internet Gaming Disorder via Maladaptive Gaming Usage Scale (MGUS)</li> </ul>                                                                                                                                     | <ul style="list-style-type: none"> <li>• higher addictive internet gaming at T2 than at T1 (1.2% to 4.9%, little clinical significance)</li> <li>• more time spent on gaming at T2 than at T1, especially in subjects with higher scores of addictive gameplay</li> <li>• males more likely to display higher addictive Internet gaming usage</li> </ul>                                                                                                                                           |
| 64. | S. Y. Kim et al. (2021) [91] | 08–11/2020 (partial school closures) | South Korea    | <ul style="list-style-type: none"> <li>• <math>M_{T1}</math> = 15.0 years</li> <li>• <math>M_{T2}</math> = 15.1 years</li> <li>• 12–18 years</li> </ul>                                             | adolescents <ul style="list-style-type: none"> <li>• T1: 48,443</li> <li>• T2: 44,216</li> </ul>               | <ul style="list-style-type: none"> <li>• T1: 06–07/2019</li> <li>• T2: 08–11/2020</li> </ul>                           | <ul style="list-style-type: none"> <li>• physical activity</li> <li>• sedentary time</li> <li>• sleep time</li> <li>• socio-economic status</li> <li>• health status</li> <li>• scholastic performance</li> </ul> | self-report <ul style="list-style-type: none"> <li>• subjective stress level via items created for the survey</li> <li>• sadness or despair via items created for the survey</li> <li>• suicidal thoughts/planning/attempt via items created for the survey</li> </ul> | <ul style="list-style-type: none"> <li>• lower degree of severe subjective stress, sadness and despair, and fewer suicidal behaviours at T2 than at T1</li> <li>• lower physical activity and sleep duration, and higher sedentary time at T2 than at T1</li> <li>• no difference in scholastic performance and subjective health between T1 and T2</li> <li>• no effect of scholastic performance, socio-economic status, and gender on differences in mental health between T1 and T2</li> </ul> |

| No. | Authors                   | Assessment during pandemic             | Country | $M_{Age}/Age$ range                                                                                                | $N$                                                                                                                    | Waves of assessment                                                                           | COVID-19-related stressors/Other variables                                                                                              | Assessment of children's and adolescents' mental health symptoms                                                                                                                                                                                                                                                                                                                                                                                                                                                                                               | Main findings                                                                                                                                                                                                                                                                                                                                                                                                                                                                                                                      |
|-----|---------------------------|----------------------------------------|---------|--------------------------------------------------------------------------------------------------------------------|------------------------------------------------------------------------------------------------------------------------|-----------------------------------------------------------------------------------------------|-----------------------------------------------------------------------------------------------------------------------------------------|----------------------------------------------------------------------------------------------------------------------------------------------------------------------------------------------------------------------------------------------------------------------------------------------------------------------------------------------------------------------------------------------------------------------------------------------------------------------------------------------------------------------------------------------------------------|------------------------------------------------------------------------------------------------------------------------------------------------------------------------------------------------------------------------------------------------------------------------------------------------------------------------------------------------------------------------------------------------------------------------------------------------------------------------------------------------------------------------------------|
| 65. | Koenig et al. (2021) [92] | 03–08/2020 (lockdown, school closures) | Germany | <ul style="list-style-type: none"> <li><math>M = 14.93</math> years</li> <li><math>\geq 12</math> years</li> </ul> | adolescents<br><ul style="list-style-type: none"> <li>T1: 324</li> <li>T2: 324 (matched convenience sample)</li> </ul> | <ul style="list-style-type: none"> <li>T1: 11/2018–03/2020</li> <li>T2: 03–08/2020</li> </ul> | <ul style="list-style-type: none"> <li>psychosocial risk factors</li> <li>socio-economic status</li> <li>family risk factors</li> </ul> | self-report<br><ul style="list-style-type: none"> <li>emotional symptoms, conduct problems, peer problems, hyperactivity and prosocial behaviour via Strengths and Difficulties Questionnaire (SDQ)</li> <li>depression via Patient Health Questionnaire modified for Adolescents (PHQ-A)</li> <li>eating disorder symptoms via Weight Concerns Scale (WCS) and Eating Disorder Examination Questionnaire (EDE-Q)</li> <li>health-related quality of life via KIDSCREEN-10</li> <li>suicidal thoughts and behaviours via Paykel Suicide Scale (PSS)</li> </ul> | <ul style="list-style-type: none"> <li>no significant difference in emotional or behavioural problems, depression, suicidal thoughts/attempts, eating disorder symptoms, or general health-related quality of life between T1 and T2</li> <li>lower rated of suicide planning (6.14% to 2.16%) and conduct problems at T2 than at T1</li> <li>family risk factors did not moderate effects of pandemic on mental health</li> <li>decrease of influence of socio-economic status on mental health problems from T1 to T2</li> </ul> |

| No. | Authors                 | Assessment during pandemic | Country | $M_{Age}/Age$ range                                                                                                                                                              | $N$                                                                                                       | Waves of assessment                                                                          | COVID-19-related stressors/Other variables                                                                                                                                                                                                                                                                                                                                                                                                                                                                                                                                                                                                                                                                                                                                                                                                                                          | Assessment of children's and adolescents' mental health symptoms                                                                                                                                                                                                                                                                                                                                                                                                                                                                                                                                         | Main findings |
|-----|-------------------------|----------------------------|---------|----------------------------------------------------------------------------------------------------------------------------------------------------------------------------------|-----------------------------------------------------------------------------------------------------------|----------------------------------------------------------------------------------------------|-------------------------------------------------------------------------------------------------------------------------------------------------------------------------------------------------------------------------------------------------------------------------------------------------------------------------------------------------------------------------------------------------------------------------------------------------------------------------------------------------------------------------------------------------------------------------------------------------------------------------------------------------------------------------------------------------------------------------------------------------------------------------------------------------------------------------------------------------------------------------------------|----------------------------------------------------------------------------------------------------------------------------------------------------------------------------------------------------------------------------------------------------------------------------------------------------------------------------------------------------------------------------------------------------------------------------------------------------------------------------------------------------------------------------------------------------------------------------------------------------------|---------------|
| 66. | Lane et al. (2021) [93] | 10–12/2020 (lockdown)      | Canada  | <ul style="list-style-type: none"> <li>• <math>M_{T1}</math> = 12.66 years</li> <li>• <math>M_{T2}</math> = 12.59 years</li> <li>• grade 7–8</li> <li>• ~ 12–14 years</li> </ul> | <ul style="list-style-type: none"> <li>• adolescents</li> <li>• T1: 1,610</li> <li>• T2: 1,380</li> </ul> | <ul style="list-style-type: none"> <li>• T1: 10–12/2019</li> <li>• T2: 10–12/2020</li> </ul> | <ul style="list-style-type: none"> <li>• self-report</li> <li>• depression via Children's Depression Inventory (CDI)</li> <li>• problematic internet use via Compulsive Internet Use Scale (CIUS)</li> <li>• symptoms of various anxiety disorders (e.g., GAD, PTSD, social anxiety disorder etc.) via Screen for Child Anxiety Related Emotional Disorders Revised (SCARED)</li> <li>• test anxiety via Test Anxiety Inventory – Short Form (TAI)</li> <li>• fear of being judged via Fear of Negative Evaluation Scale (FNE)</li> <li>• perfectionism via Child-Adolescent Perfectionism Scale</li> <li>• intolerance to uncertainty, cognitive avoidance and negative attitude when faced with problems via Cognitions Reliées à l'Anxiété Généralisée pour Enfants Questionnaire (CAG)</li> <li>• impact of anxiety via Child/Adolescent Anxiety Impact Scale (CAIS)</li> </ul> | <ul style="list-style-type: none"> <li>• more symptoms of generalized anxiety, test anxiety, fear of judgement and perfectionism reported at T2 than at T1</li> <li>• no difference in all other variables (e.g., PTSD, social anxiety disorder, internet use, depression) between T1 and T2</li> <li>• 14.4% reported that lockdown had a positive effect on their well-being and mental health, 23.5% reported negative effect, 62.1% reported no effect</li> <li>• more students in grade 8 than in grade 7 and more girls than boys reported negative effect of lockdown on mental health</li> </ul> |               |

| No. | Authors                    | Assessment during pandemic                            | Country     | $M_{Age}/Age$ range                                                                                                                                    | $N$                                                                                                                         | Waves of assessment                                                                               | COVID-19-related stressors/Other variables                                                                                                                                                                                                                                                                        | Assessment of children's and adolescents' mental health symptoms                                                                                                                                                                       | Main findings                                                                                                                                                                                                                                                                                                                                                                                                                                                                                                                                                                                                                                                                                                                                    |
|-----|----------------------------|-------------------------------------------------------|-------------|--------------------------------------------------------------------------------------------------------------------------------------------------------|-----------------------------------------------------------------------------------------------------------------------------|---------------------------------------------------------------------------------------------------|-------------------------------------------------------------------------------------------------------------------------------------------------------------------------------------------------------------------------------------------------------------------------------------------------------------------|----------------------------------------------------------------------------------------------------------------------------------------------------------------------------------------------------------------------------------------|--------------------------------------------------------------------------------------------------------------------------------------------------------------------------------------------------------------------------------------------------------------------------------------------------------------------------------------------------------------------------------------------------------------------------------------------------------------------------------------------------------------------------------------------------------------------------------------------------------------------------------------------------------------------------------------------------------------------------------------------------|
| 67. | Luijten et al. (2021) [94] | 04–05/2020 (lockdown)                                 | Netherlands | <ul style="list-style-type: none"> <li>• <math>M_{T1}</math> = 13.1 years</li> <li>• <math>M_{T2}</math> = 13.4 years</li> <li>• 8–18 years</li> </ul> | children and adolescents <ul style="list-style-type: none"> <li>• T1: 2,401</li> <li>• T2: 844 and their parents</li> </ul> | <ul style="list-style-type: none"> <li>• T1: 12/2017–07/2018</li> <li>• T2: 04–05/2020</li> </ul> | <ul style="list-style-type: none"> <li>• change in parental working situation</li> <li>• COVID-19 infection in a friend or family member</li> <li>• attendance of childcare/school during lockdown</li> <li>• family atmosphere during lockdown and before</li> <li>• impact of lockdown on daily life</li> </ul> | self-report <ul style="list-style-type: none"> <li>• global health, peer relationships, anxiety, depressive symptoms, anger, sleep-related impairment via Patient-Reported Outcomes Measurement Information System (PROMIS)</li> </ul> | <ul style="list-style-type: none"> <li>• worse scores in all domains at T2 than at T1, i.e., more severe anxiety (8.6% to 16.7%), depression and sleep-related impairment (7.1% to 8.2%)</li> <li>• less reports of poor global health (T1: 4.6% to T2: 1.7%)</li> <li>• worse atmosphere in the family during lockdown than before</li> <li>• 90% indicated that lockdown had a negative impact on their life (missing friends and family, participation in sports, freedom, school and joyful activities, and boredom)</li> <li>• risk factors for mental health problems: single-parent family, more than two children in the family, negative change in working situation of parents due to COVID-19, infected friend or relative</li> </ul> |
| 68. | Saito et al. (2021) [39]   | 05/2020 (school closure) & 10/2020 (school reopening) | Japan       | <ul style="list-style-type: none"> <li>• <math>M</math> = 11.4 years</li> <li>• <math>\geq 9</math> years</li> </ul>                                   | children and adolescents <ul style="list-style-type: none"> <li>• T1: 78</li> <li>• T2: 113</li> </ul>                      | <ul style="list-style-type: none"> <li>• T1: 05/2020</li> <li>• T2: 10/2020</li> </ul>            | <ul style="list-style-type: none"> <li>• learning environment</li> <li>• time spent with family members</li> <li>• contact with friends</li> <li>• changes in daily routines</li> <li>• physical condition</li> <li>• home activities</li> </ul>                                                                  | self-report <ul style="list-style-type: none"> <li>• well-being via WHO Five Well-Being Index (WHO-5-J): learning environment, contact with friends and family, home activities, daily routine, and physical condition</li> </ul>      | <ul style="list-style-type: none"> <li>• no change number of children with mental health problems from T1 to T2 (18% to 20%)</li> <li>• more disruptions of sleep rhythms, eating habits and physical activity at T1 than at T2</li> <li>• more time spent with family and sleeping, and more rest at T1 than at T2</li> <li>• less activity and interest at T1 than at T2</li> </ul>                                                                                                                                                                                                                                                                                                                                                            |

| No. | Authors                         | Assessment during pandemic                               | Country | M <sub>Age</sub> /Age range | N                                                           | Waves of assessment                                                    | COVID-19-related stressors/Other variables | Assessment of children's and adolescents' mental health symptoms                                                                                                                                                                           | Main findings                                                                                                                                                                                                                                                                                                   |
|-----|---------------------------------|----------------------------------------------------------|---------|-----------------------------|-------------------------------------------------------------|------------------------------------------------------------------------|--------------------------------------------|--------------------------------------------------------------------------------------------------------------------------------------------------------------------------------------------------------------------------------------------|-----------------------------------------------------------------------------------------------------------------------------------------------------------------------------------------------------------------------------------------------------------------------------------------------------------------|
| 69. | Thorisdottir et al. (2021) [95] | 09–11/2020 (strict restrictions, third wave of pandemic) | Iceland | • 13–18 years               | adolescents<br>• T1: 21,404<br>• T2: 20,822<br>• T3: 17,475 | • T1: 02/2016 & 10/2016<br>• T2: 02/2016 & 10/2018<br>• T3: 09–11/2020 |                                            | self-report<br>• depressive symptoms via Symptom Checklist-90 (SCL-90)<br>• mental well-being via Short Warwick Edinburgh Mental Well-being Scale (WEMWBS)<br>• frequency of cigarette smoking, e-cigarette use and alcoholic intoxication | • increase depressive symptoms and worsening in mental well-being from T1 and T2 to T3 across all age groups<br>• decrease in cigarette smoking, e-cigarette use and alcohol intoxication among 15–18-year-olds<br>• worse mental health outcomes in girls than in boys, no gender differences in substance use |

298 *Note.* This table summarises the main characteristics and findings of repeated cross-sectional studies ( $n = 11$ ). The studies are sorted  
 299 alphabetically based on the first author's last name. Two studies combining longitudinal (within-subjects), and repeated cross-sectional  
 300 (between-subjects) designs are listed in Table 1. Note that additional variables ("COVID-19-related stressors/Other variables") were  
 301 summarised and the table does not provide a complete record of all studied variables. As most studies collected demographic information like  
 302 age, gender and socio-economic background, these variables are not specifically listed as "other variables" in the table. If not specified  
 303 otherwise, the depicted results include only findings concerning children and adolescents. Findings concerning other age groups are mostly  
 304 omitted.

## 305 Changes in mental health due to the COVID-19 pandemic

306 Table 3 displays the mental health indicators and symptoms assessed in the studies  
 307 with a pre-pandemic measurement and how frequently the respective indicators and  
 308 symptoms were assessed. The studies' findings concerning the change of the prevalence or  
 309 intensity of the respective mental health indicators and symptoms from before the pandemic  
 310 to during the pandemic are summarised in Table 3 as well. The seven studies without a pre-  
 311 pandemic measure are not included in the table [30,33–35,37–39].

312 **Table 3. Summary of Main Results of Studies Comparing Pre-Pandemic Levels of**  
 313 **Mental Health with Measures During the Pandemic.**

| Indicator of mental health                     | Number of studies (N) | Increase from pre-pandemic to pandemic                     | No change from pre-pandemic to pandemic | Decrease from pre-pandemic to pandemic |
|------------------------------------------------|-----------------------|------------------------------------------------------------|-----------------------------------------|----------------------------------------|
| Quality of life/Well-being                     | 11                    | 2<br>[57,89]                                               | 2<br>[87,92]                            | 8<br>[28,44,50,57,68,69,85,95]         |
| Life satisfaction                              | 3                     | 0                                                          | 1<br>[74]                               | 2<br>[76,80]                           |
| Resilience                                     | 1                     | 0                                                          | 0                                       | 1<br>[65]                              |
| Positive affect                                | 4                     | 0                                                          | 1<br>[54]                               | 3<br>[73,74,76]                        |
| <b>Total positive mental health indicators</b> |                       | <b>2</b>                                                   | <b>4</b>                                | <b>14</b>                              |
| Global measures of mental health problems      | 8                     | 5<br>[47,55,77,78,81]                                      | 3<br>[47,64,87]                         | 1<br>[71]                              |
| Stress                                         | 5                     | 4<br>[31,49,50,70]                                         | 0                                       | 1<br>[91]                              |
| Negative affect                                | 4                     | 3<br>[54,73,74]                                            | 1<br>[76]                               | 0                                      |
| Internalising symptoms                         | 21                    | 8<br>[36,52,56,58,62,63,78,88]                             | 9<br>[40,41,45,46,64,77,80,81,92]       | 5<br>[55,62,66,71,89]                  |
| Externalising symptoms                         | 13                    | 8<br>[36,56,58,63,77,78,83,88]                             | 4<br>[40,41,71,92]                      | 2<br>[71,89]                           |
| Depression symptoms                            | 29                    | 19<br>[28,29,42–44,46,51,53,59–61,67,73,74,76,83,84,94,95] | 7<br>[31,58,79,82,86,92,93]             | 3<br>[45,75,91]                        |
| Anxiety symptoms                               | 20                    | 13<br>[28,29,44,51,53,60,72,73,76,79,84,93,94]             | 8<br>[31,32,46,51,72,79,83,93]          | 5<br>[31,32,45,61,75]                  |

| Indicator of mental health                                  | Number of studies (N) | Increase from pre-pandemic to pandemic | No change from pre-pandemic to pandemic | Decrease from pre-pandemic to pandemic |
|-------------------------------------------------------------|-----------------------|----------------------------------------|-----------------------------------------|----------------------------------------|
| Cognitive symptoms                                          | 7                     | 5<br>[29,52,58,66,78]                  | 2<br>[55,71]                            | 0                                      |
| Hyperactivity symptoms                                      | 8                     | 5<br>[52,58,62,64,77]                  | 3<br>[29,55,58]                         | 1<br>[62]                              |
| Disruptive behaviour symptoms                               | 9                     | 4<br>[29,55,58,62]                     | 6<br>[29,52,58,64,77,82]                | 2<br>[62,92]                           |
| Behavioural addiction symptoms (electronic media, Internet) | 5                     | 3<br>[31,79,90]                        | 1<br>[79]                               | 1<br>[49]                              |
| Substance use and addiction symptoms                        | 3                     | 1<br>[27]                              | 1<br>[48]                               | 3<br>[27,48,95]                        |
| Psychosomatic symptoms                                      | 4                     | 3<br>[28,50,66]                        | 0                                       | 1<br>[80]                              |
| Post-traumatic stress symptoms                              | 2                     | 1<br>[83]                              | 1<br>[93]                               | 0                                      |
| Suicidal symptoms                                           | 2                     | 0                                      | 1<br>[92]                               | 2<br>[91,92]                           |
| Neurotic symptoms                                           | 1                     | 1<br>[42]                              | 0                                       | 0                                      |
| Dissociative symptoms                                       | 1                     | 0                                      | 1<br>[42]                               | 0                                      |
| Eating disorder symptoms                                    | 1                     | 0                                      | 1<br>[92]                               | 0                                      |
| Psychotic symptoms                                          | 1                     | 1<br>[84]                              | 0                                       | 0                                      |
| <b>Total negative mental health indicators</b>              |                       | <b>84</b>                              | <b>49</b>                               | <b>27</b>                              |

314 *Note.* This table depicts the number of studies investigating a respective positive or negative  
315 indicator of mental health; the number of studies finding a significant increase, significant  
316 decrease, and/or no change of a respective indicator from a pre-pandemic assessment to an  
317 assessment during the COVID-19 pandemic; and the sum of findings over all  
318 positive/negative indicators. Studies with no pre-pandemic measurement are not included in  
319 this table ( $n = 7$ ). Studies appear multiple times in the same category if they reported  
320 multiple trends, e.g., for different age groups or for different aspect of a symptom group. If a  
321 study assessed multiple outcomes, each finding was listed separately.

322 The results of the 14 studies investigating changes over the course pandemic are  
323 summarised hereinafter. Even though the results are mixed, the overall tendency of findings

324 indicates a decrease of mental health symptoms (internalising and externalising symptoms,  
325 stress, depression, anxiety, conduct problems, attention problems, problematic smartphone  
326 and Internet use) and an increase of well-being, when assessments taken during periods of  
327 lockdown/stronger restrictions and higher infection rates were compared with assessments  
328 taken during or after the lift of restrictions and easing of the pandemic situation [29–31,33–  
329 35,37,38,40]. However, eight studies did not find a significant change in certain symptoms  
330 (i.e. internalising and externalising symptoms, depression, anxiety, attention problems,  
331 substance use) and thus did not completely support this trend [27,29,31–35,39]. Two of  
332 those studies even reported an increase of certain mental health symptoms (i.e. eating  
333 disorder symptoms, hyperactivity, conduct problems) [34,35].

334 One study comparing measurements between a period of lifted regulations and a  
335 following period of reinforced restrictions reported mainly an increase in symptoms of poor  
336 mental health (i.e., anxiety, depression, and psychosomatic symptoms, decrease of health-  
337 related quality of life) [28].

338 Although most studies reported a decrease in at least some psychopathological  
339 symptoms after an ease of the pandemic situation, it is less clear if children and adolescents  
340 return to a pre-pandemic level of functioning. Of the seven studies with multiple  
341 measurements during the pandemic and a pre-pandemic assessment, five reported an  
342 increase of some symptoms from the pre-pandemic measure to the assessment during the  
343 pandemic with loosened restrictions [27–29,31,36], three reported a decrease of symptoms  
344 from pre-pandemic levels to during less-restricted periods of the pandemic [27,31,32], and  
345 three did not find a difference between the two time points [29,31,40].

## 346 **Factors influencing COVID-19-related changes in mental** 347 **health**

348 Table 4 summarises influencing factors that have been reported to be associated  
349 with mental health outcomes during the COVID-19 pandemic and therefore mediate or  
350 moderate the effect of the COVID-19 pandemic on children's and adolescents' mental



351 health. For simplicity purposes, moderators, mediators, and correlates of outcomes were  
 352 classified as “risk factors” if they were associated with more negative mental health effects  
 353 and as “protective factors” if they were associated with less severe negative mental health  
 354 outcomes.

355 **Table 4. Risk and Protective Factors of the COVID-19 Pandemic’s Mental Health Effects.**

| Factor categories        | Risk factors                                                                                                                                                                                                                                                                                                                                                                                                                                                                                                                                                                                                                                                                                                                                        | Protective factors                                                                                                                                                                                                                                                                                                                                                                                                                                                                                                                                                             |
|--------------------------|-----------------------------------------------------------------------------------------------------------------------------------------------------------------------------------------------------------------------------------------------------------------------------------------------------------------------------------------------------------------------------------------------------------------------------------------------------------------------------------------------------------------------------------------------------------------------------------------------------------------------------------------------------------------------------------------------------------------------------------------------------|--------------------------------------------------------------------------------------------------------------------------------------------------------------------------------------------------------------------------------------------------------------------------------------------------------------------------------------------------------------------------------------------------------------------------------------------------------------------------------------------------------------------------------------------------------------------------------|
| Sociodemographic factors | <ul style="list-style-type: none"> <li>female gender (depression, anxiety, internalising symptoms, well-being, life satisfaction, stress, psychosomatic symptoms) [37,59–62,68,70,80,83,93,95]</li> <li>male gender (general mental health problems, quality of life, attention problems, addictive behaviour) [28,37,47,90]</li> <li>younger age (behavioural and emotional problems, psychosomatic symptoms, quality of life) [28,35,37]</li> <li>older age (depression, anxiety, behavioural addiction) [27,32,58,66,79,93]</li> <li>being an only child [62,72]</li> <li>low family income, financial worries [29,56,62,70]</li> <li>social disadvantage [28,78]</li> <li>living in an apartment, without access to green space [68]</li> </ul> | <ul style="list-style-type: none"> <li>female gender (general mental health problems, quality of life, attention problems, addictive behaviour) [28,37,47,90]</li> <li>male gender (depression, anxiety, internalising symptoms, well-being, life satisfaction, stress, psychosomatic symptoms) [37,59–62,68,70,80,83,93,95]</li> <li>younger age (depression, anxiety, behavioural addiction) [27,32,58,66,79,93]</li> <li>older age (internalising and externalising problems, quality of life) [28,35,37]</li> <li>living in a house, access to green space [68]</li> </ul> |
| Intra-individual factors | <ul style="list-style-type: none"> <li>pre-existing mental health problems [62,76,83]</li> <li>poor physical health [49]</li> <li>neurodevelopmental disorders, special educational needs [35,37]</li> <li>negative coping strategies (emotion-focussed engaged and disengaged coping) [41,63]</li> <li>dysfunctional/missing emotion regulation abilities (e.g., dampening positive emotions) [29,54,70,74]</li> <li>negative cognitive styles [59]</li> <li>emotional instability [42]</li> <li>high extraversion [43]</li> </ul>                                                                                                                                                                                                                 | <ul style="list-style-type: none"> <li>good physical health [49]</li> <li>positive coping mechanisms (e.g., talking to friends, prioritising sleep, problem-focussed engaged coping) [51]</li> <li>positive emotion regulation abilities, high emotional awareness/competence [29,54,70,75]</li> <li>resilience [59,65]</li> <li>self-efficacy [63]</li> <li>eudemonic and hedonic motives [74]</li> </ul>                                                                                                                                                                     |
| Parental/Family factors  | <ul style="list-style-type: none"> <li>single parent [62,72,94]</li> <li>parental stress and strain [30,33,70]</li> <li>parental mental health problems, psychological distress [28,35]                             <ul style="list-style-type: none"> <li>depression [46,78]</li> <li>anxiety [88]</li> <li>use of alcohol and drugs [27]</li> </ul> </li> <li>parental negative coping strategies [41]</li> <li>maternal burden of care [46]</li> <li>parental over-reactivity [41]</li> <li>parental expressive suppression of emotions [33]</li> <li>dysfunctional parenting styles [55]</li> <li>family stress and instability [66]</li> </ul>                                                                                                 | <ul style="list-style-type: none"> <li>family functioning [71]</li> <li>positive family climate [28]</li> <li>maternal high mind-mindedness [88]</li> </ul>                                                                                                                                                                                                                                                                                                                                                                                                                    |
| Social factors           | <ul style="list-style-type: none"> <li>deterioration of relationships to others [55]</li> <li>missing friends [66]</li> </ul>                                                                                                                                                                                                                                                                                                                                                                                                                                                                                                                                                                                                                       | <ul style="list-style-type: none"> <li>friend support/contact to friends [45,46,61,65]</li> <li>social support [28,65,76]</li> </ul>                                                                                                                                                                                                                                                                                                                                                                                                                                           |

| Factor categories        | Risk factors                                                                                                                                                                                                                                                                                                                                                                                                                                                                                                                                                                                                                                           | Protective factors                                                                                                                                                                                                                                                                                   |
|--------------------------|--------------------------------------------------------------------------------------------------------------------------------------------------------------------------------------------------------------------------------------------------------------------------------------------------------------------------------------------------------------------------------------------------------------------------------------------------------------------------------------------------------------------------------------------------------------------------------------------------------------------------------------------------------|------------------------------------------------------------------------------------------------------------------------------------------------------------------------------------------------------------------------------------------------------------------------------------------------------|
| COVID-19-related factors | <ul style="list-style-type: none"> <li>infection risk, infected friend or relative [72,94]</li> <li>perceived lifestyle impact of the pandemic [53]</li> <li>negative change in parental working situation [94]</li> <li>perceived stress [41,59,61]</li> <li>isolation and loneliness [42,43]</li> <li>worry, concerns about health [42,55,61,66]</li> <li>concerns/fears about the pandemic [80,86]</li> <li>frustration, boredom [55]</li> <li>negative home-schooling experience [66]</li> <li>increased restrictions [33,34]</li> <li>feelings of uncertainty [27]</li> <li>material hardship [27]</li> <li>high exposure to news [36]</li> </ul> |                                                                                                                                                                                                                                                                                                      |
| Behavioural factors      | <ul style="list-style-type: none"> <li>mainly staying at home during confinement [70]</li> <li>increased, passive screen time [36,78]</li> <li>taking part in many leisure time activities prior to the pandemic [77]</li> <li>less school assignment completion [78]</li> </ul>                                                                                                                                                                                                                                                                                                                                                                       | <ul style="list-style-type: none"> <li>physical health behaviours:                             <ul style="list-style-type: none"> <li>exercising for minimum 1h/day [72]</li> <li>adequate sleep [36]</li> </ul> </li> <li>structured routines [36,76]</li> <li>time spent in nature [36]</li> </ul> |

356 Table 5 portrays the change of mental health indicators and symptoms from before to  
 357 during the pandemic and how frequently these symptoms were assessed in three separate  
 358 age groups (< six years, six–12 years, > 12 years).

359 **Table 5. Summary of Main Results of Studies Comparing Pre-Pandemic Levels of**  
 360 **Mental Health with Measures During the Pandemic Sorted by Age Group.**

| Indicator of mental health     | Direction of Change | Younger children (~ < 6 years) | School-aged children (~ 6-12 years) | Adolescents (~ > 12 years)  |
|--------------------------------|---------------------|--------------------------------|-------------------------------------|-----------------------------|
| Quality of life/<br>well-being | +                   | 0                              | 1 [89]                              | 1 [57]                      |
|                                | 0                   | 0                              | 1 [87]                              | 1 [92]                      |
|                                | -                   | 1 [96]                         | 3 [28,68,96]                        | 8 [28,44,50,57,68,69,95,96] |
| Life satisfaction              | +                   | 0                              | 0                                   | 0                           |
|                                | 0                   | 0                              | 0                                   | 1 [74]                      |
|                                | -                   | 0                              | 0                                   | 2 [76,80]                   |
| Resilience                     | +                   | 0                              | 0                                   | 0                           |
|                                | 0                   | 0                              | 0                                   | 0                           |
|                                | -                   | 0                              | 0                                   | 1 [65]                      |

| Indicator of mental health                     | Direction of Change | Younger children (~ < 6 years) | School-aged children (~ 6-12 years) | Adolescents (~ > 12 years) |
|------------------------------------------------|---------------------|--------------------------------|-------------------------------------|----------------------------|
| Positive affect                                | +                   | 0                              | 0                                   | 0                          |
|                                                | 0                   | 0                              | 1<br>[54]                           | 1<br>[54]                  |
|                                                | -                   | 0                              | 0                                   | 3<br>[73,74,76]            |
| <b>Total positive mental health indicators</b> | +                   | <b>0</b>                       | <b>1</b>                            | <b>1</b>                   |
|                                                | 0                   | <b>0</b>                       | <b>2</b>                            | <b>3</b>                   |
|                                                | -                   | <b>1</b>                       | <b>3</b>                            | <b>14</b>                  |
| Global measures of mental health problems      | +                   | 2<br>[47,77]                   | 3<br>[47,78,81]                     | 2<br>[55,72]               |
|                                                | 0                   | 2<br>[47,64]                   | 2<br>[47,87]                        | 0                          |
|                                                | -                   | 0                              | 1<br>[71]                           | 1<br>[71]                  |
| Stress                                         | +                   | 0                              | 3<br>[31,49,70]                     | 3<br>[31,50,70]            |
|                                                | 0                   | 0                              | 0                                   | 0                          |
|                                                | -                   | 0                              | 0                                   | 1<br>[91]                  |
| Negative affect                                | +                   | 0                              | 1<br>[54]                           | 3<br>[54,73,74]            |
|                                                | 0                   | 0                              | 0                                   | 1<br>[76]                  |
|                                                | -                   | 0                              | 0                                   | 0                          |
| Internalising symptoms                         | +                   | 1<br>[88]                      | 5<br>[36,56,58,62,78]               | 4<br>[36,52,62,63]         |
|                                                | 0                   | 3<br>[58,64,77]                | 5<br>[40,41,45,46,81]               | 3<br>[40,80,92]            |
|                                                | -                   | 0                              | 4<br>[62,66,71,89]                  | 3<br>[55,62,71]            |
| Externalising symptoms                         | +                   | 2<br>[77,88]                   | 5<br>[36,56,58,78,83]               | 2<br>[36,63]               |
|                                                | 0                   | 1<br>[58]                      | 3<br>[40,41,71]                     | 3<br>[40,71,92]            |
|                                                | -                   | 0                              | 2<br>[71,89]                        | 1<br>[71]                  |

| Indicator of mental health                                  | Direction of Change | Younger children (~ < 6 years) | School-aged children (~ 6-12 years) | Adolescents (~ > 12 years)                           |
|-------------------------------------------------------------|---------------------|--------------------------------|-------------------------------------|------------------------------------------------------|
| Depression symptoms                                         | +                   | 0                              | 4<br>[28,46,83,94]                  | 17<br>[28,29,42-44,51,53,59-61,67,73,74,76,84,94,95] |
|                                                             | 0                   | 1<br>[58]                      | 3<br>[31,58,79]                     | 7<br>[31,51,79,82,86,92,93]                          |
|                                                             | -                   | 0                              | 2<br>[45,75]                        | 2<br>[75,90]                                         |
| Anxiety symptoms                                            | +                   | 0                              | 2<br>[28,94]                        | 13<br>[28,29,44,51,53,60,72,73,76,79,84,93,94]       |
|                                                             | 0                   | 0                              | 5<br>[31,32,46,79,83]               | 4<br>[31,51,72,93]                                   |
|                                                             | -                   | 0                              | 4<br>[31,32,45,75]                  | 3<br>[31,61,75]                                      |
| Cognitive symptoms                                          | +                   | 0                              | 3<br>[58,66,78]                     | 2<br>[29,52]                                         |
|                                                             | 0                   | 0                              | 1<br>[71]                           | 2<br>[55,71]                                         |
|                                                             | -                   | 0                              | 0                                   | 0                                                    |
| Hyperactivity symptoms                                      | +                   | 2<br>[64,77]                   | 2<br>[58,62]                        | 2<br>[52,62]                                         |
|                                                             | 0                   | 1<br>[58]                      | 0                                   | 2<br>[29,55]                                         |
|                                                             | -                   | 0                              | 1<br>[62]                           | 1<br>[62]                                            |
| Disruptive behaviour symptoms                               | +                   | 0                              | 3<br>[58,62,83]                     | 3<br>[29,55,62]                                      |
|                                                             | 0                   | 3<br>[58,64,77]                | 2<br>[58]                           | 3<br>[29,52,82]                                      |
|                                                             | -                   | 0                              | 1<br>[62]                           | 2<br>[62,92]                                         |
| Behavioural addiction symptoms (electronic media, Internet) | +                   | 0                              | 2<br>[31,90]                        | 3<br>[31,79,90]                                      |
|                                                             | 0                   | 0                              | 1<br>[79]                           | 0                                                    |
|                                                             | -                   | 0                              | 1<br>[49]                           | 0                                                    |

| Indicator of mental health           | Direction of Change | Younger children (~ < 6 years) | School-aged children (~ 6-12 years) | Adolescents (~ > 12 years) |
|--------------------------------------|---------------------|--------------------------------|-------------------------------------|----------------------------|
| Substance use and addiction symptoms | +                   | 0                              | 1<br>[27]                           | 1<br>[27]                  |
|                                      | 0                   | 0                              | 0                                   | 1<br>[48]                  |
|                                      | -                   | 0                              | 1<br>[27]                           | 3<br>[27,48,95]            |
| Psychosomatic symptoms               | +                   | 0                              | 2<br>[28,66]                        | 2<br>[28,50]               |
|                                      | 0                   | 0                              | 0                                   | 0                          |
|                                      | -                   | 0                              | 0                                   | 1<br>[80]                  |
| Post-traumatic stress symptoms       | +                   | 0                              | 1<br>[83]                           | 0                          |
|                                      | 0                   | 0                              | 0                                   | 1<br>[93]                  |
|                                      | -                   | 0                              | 0                                   | 0                          |
| Suicidal symptoms                    | +                   | 0                              | 0                                   | 0                          |
|                                      | 0                   | 0                              | 0                                   | 1<br>[92]                  |
|                                      | -                   | 0                              | 0                                   | 2<br>[91,92]               |
| Neurotic symptoms                    | +                   | 0                              | 0                                   | 1<br>[42]                  |
|                                      | 0                   | 0                              | 0                                   | 0                          |
|                                      | -                   | 0                              | 0                                   | 0                          |
| Dissociative symptoms                | +                   | 0                              | 0                                   | 0                          |
|                                      | 0                   | 0                              | 0                                   | 1<br>[42]                  |
|                                      | -                   | 0                              | 0                                   | 0                          |
| Eating disorder symptoms             | +                   | 0                              | 0                                   | 0                          |
|                                      | 0                   | 0                              | 0                                   | 1<br>[92]                  |
|                                      | -                   | 0                              | 0                                   | 0                          |
| Psychotic symptoms                   | +                   | 0                              | 0                                   | 1<br>[84]                  |
|                                      | 0                   | 0                              | 0                                   | 0                          |
|                                      | -                   | 0                              | 0                                   | 0                          |

| Indicator of mental health                     | Direction of Change | Younger children (~ < 6 years) | School-aged children (~ 6-12 years) | Adolescents (~ > 12 years) |
|------------------------------------------------|---------------------|--------------------------------|-------------------------------------|----------------------------|
| <b>Total negative mental health indicators</b> | +                   | 7                              | 37                                  | 59                         |
|                                                | 0                   | 11                             | 22                                  | 30                         |
|                                                | -                   | 0                              | 17                                  | 20                         |

361 *Note.* This table depicts the number the number of studies finding a significant increase  
 362 (indicated by “+”), significant decrease (indicated by “-”), and/or no change (indicated by “0”)  
 363 of a respective indicator from a pre-pandemic assessment to an assessment during the  
 364 COVID-19 pandemic and the sum of findings over all positive/negative indicators sorted by  
 365 age of participants. Studies with no pre-pandemic measurement are not included in this table  
 366 ( $n = 7$ ). Studies might appear multiple times in the same category if they reported multiple  
 367 trends, e.g., for different age groups or for different aspect of a symptom group. If a study  
 368 assessed multiple outcomes, each finding was listed separately.

369 Table 6 summarises regional differences in mental health outcomes by listing those  
 370 countries contributing more than three studies to this review.

371 **Table 6. Change of Mental Health from Pre-Pandemic to During the Pandemic Sorted**  
 372 **by Country.**

| Country                  | Number of studies (N) | Worsening in mental health from pre-pandemic to pandemic | No change in mental health from pre-pandemic to pandemic | Improvement of mental health from pre-pandemic to pandemic |
|--------------------------|-----------------------|----------------------------------------------------------|----------------------------------------------------------|------------------------------------------------------------|
| United States of America | 14                    | 11<br>[27,29,36,51,54,56,59,63,73,74,78]                 | 7<br>[29,48,51,54,71,74,82]                              | 3<br>[27,48,71]                                            |
| China                    | 8                     | 7<br>[31,49,65,67,72,79,84]                              | 3<br>[31,72,79]                                          | 3<br>[31,49,75]                                            |
| United Kingdom           | 4                     | 3<br>[46,62,83]                                          | 2<br>[46,83]                                             | 2<br>[62,89]                                               |
| Germany                  | 5                     | 5<br>[28,43,70,85]                                       | 1<br>[92]                                                | 1<br>[92]                                                  |
| Canada                   | 6                     | 5<br>[44,47,53,61,93]                                    | 3<br>[47,87,93]                                          | 1<br>[61]                                                  |
| Netherlands              | 4                     | 3<br>[45,80,94]                                          | 3<br>[41,45,80]                                          | 1<br>[80]                                                  |
| Spain                    | 4                     | 3<br>[34,55,58]                                          | 4<br>[32,34,55,58]                                       | 2<br>[32,55]                                               |

373 *Note.* This table depicts the number of findings on a respective direction of change of any  
374 mental health symptom or indicator from before to during the pandemic sorted by country.  
375 Only countries with at least four studies were included in this table. Three studies from the  
376 United Kingdom and one study from Germany without a pre-pandemic measure are not  
377 included in this table [30,35,37,38]. Studies might appear multiple times if they reported  
378 multiple trends, e.g., for different age groups or for different indicators.

## 379 **Discussion**

380 The COVID-19 pandemic and the protection measures to contain its spread have  
381 massively changed daily lives of billions of children and adolescents worldwide. Here a  
382 systematic literature review on the longitudinal effects of the COVID-19 pandemic on child  
383 and adolescent mental health was conducted in the face of a lack of reviews and meta-  
384 analyses which a) investigate longitudinal changes in child and adolescent mental health,  
385 and b) include studies conducted after the initial months of the pandemic. The current review  
386 was executed according to the Preferred Reporting Items for Systematic Reviews and Meta-  
387 Analyses (PRISMA) statement [26].

388 Sixty-nine longitudinal and repeated cross-sectional studies published between  
389 September 2020 and December 2021 assessing child and adolescent mental health over the  
390 first 17 months of the pandemic were included. Changes were assessed in a range of both  
391 general mental health indicators and specific psychopathological symptoms from before to  
392 during the pandemic and over its course. Furthermore, factors influencing these effects were  
393 summarised.

## 394 **Changes in mental health from before to during the** 395 **pandemic**

396 We expected to find an increase in general psychopathological stress levels and  
397 symptoms of mental disorders in children and adolescents due to the exposure to the  
398 COVID-19 pandemic. This trend was predicted particularly for internalising symptoms of

399 depression and anxiety, externalising symptoms, attentional problems, post-traumatic stress,  
400 and psychosomatic symptoms.

401           Regarding all negative indicators of mental health, such as psychological distress,  
402 negative affect, or specific psychopathological symptoms, 84 findings of an increase in a  
403 single mental health indicator were reported. However, almost as many findings did not  
404 support an increase in negative mental health indicators, with 49 findings showing no  
405 change and 27 findings showing a decrease in such an indicator. The findings for the  
406 change of global measures of poor mental health (i.e., outcomes not specific to a certain  
407 indicator or symptom group, e.g., total scores of mental health questionnaires) are also  
408 mixed but more in line with an increase of these constructs, with five findings supportive of  
409 this trend compared to four non-supportive findings. There is clearer support for an increase  
410 in the indicators “stress” and “negative affect”. Each had only one finding not supportive of  
411 an increase, compared to four and three findings supporting an increase, respectively.

412           The findings for positive mental health indicators, such as quality of life, life  
413 satisfaction, positive affect, resilience, and well-being, are more homogeneous and support a  
414 decrease of mental health from before to during the pandemic (14 supportive findings vs. six  
415 non-supportive findings).

416           The trend for global measures of internalising symptoms is less clear and would  
417 rather suggest no change (nine supportive findings) or an increase (eight supportive  
418 findings) than a decrease in symptoms (five supportive findings). This is contradictory to the  
419 expectations that predicted a clear increase in internalising symptoms.

420           Negative effects of the pandemic are clearer if symptoms of individual internalising  
421 syndromes are inspected separately. The support for an increase in depressive symptoms is  
422 strong (19 supportive findings vs. 10 non-supportive findings). This increase fits the  
423 presumed effect based on previous literature and appears logical in the face of enforced  
424 isolation, the lack of social contacts, pandemic-related worries, the loss of many positive  
425 leisure time activities and daily structure.



426            However, there is more variability in data regarding anxiety symptoms with 13 studies  
427 finding an increase in symptoms and the same number of studies not reporting an increase  
428 in symptoms.

429            A rise in the general scores of externalising symptoms from before to during the  
430 COVID-19 pandemic is supported by most of the reviewed studies assessing these  
431 symptoms (eight supporting findings vs. six non-supporting findings).

432            When specific externalising syndromes are regarded separately, different results can  
433 be observed. While symptoms of hyperactivity and inattention seem to have increased  
434 (hyperactivity: five supportive findings vs. four non-supportive findings; inattention: five  
435 supportive vs. two non-supportive findings), there is greater evidence for no change in the  
436 frequency of disruptive behaviour symptoms (six supportive findings) than for an increase  
437 (four supportive findings) or a decrease (two supportive findings).

438            The increase in hyperactive symptoms can be explained by the restricted  
439 opportunities for physical activity during the pandemic due to stay-at-home orders, closures  
440 of schools, sport clubs, playgrounds, gyms, public swimming pools, etc., and the cancellation  
441 of leisure time activities associated with physical exercise.

442            The lack of evidence indicating an increase in disruptive behaviour problems can be  
443 explained by the stability of underlying disorders and dispositions. Furthermore, the display  
444 of such symptoms is often situation-specific, meaning symptoms only become evident in  
445 certain social settings, for example, in school. The exposure to these situations was reduced  
446 in the pandemic due to stay-at-home orders and the closures of schools potentially leading  
447 to limited chances to exercise and observe these problematic behaviours.

448            Taken together, in light of the reviewed studies, the first hypothesis of increased  
449 psychopathological stress and symptom levels, particularly regarding symptoms of  
450 depressive, anxiety, attentional, psychosomatic and post-traumatic stress symptoms, was  
451 supported.

452            The findings are in line with previous research finding an increase in  
453 psychopathological distress and symptoms of depression and anxiety in children,

454 adolescents, and adults in the context of disasters in general [97–100] and the COVID-19  
455 pandemic in particular [6,15,16,20–22,101,102].

456           However, the few existing meta-analytic studies regarding mental health effects of  
457 the COVID-19 pandemic based on longitudinal data [23–25] indicated no or only slight  
458 changes in mental health in the general population due to highly heterogeneous data. This  
459 high variability in findings across studies was also observed in this review, in particular  
460 regarding more global measures of mental health indicators (e.g., internalising symptoms).  
461 Negative effects of the pandemic on children’s mental health became more detectable when  
462 specific symptom groups were examined separately and when studies were sorted by age of  
463 participants. This fits the assumption that effects might differ across different regions, social  
464 groups, and contexts which will be discussed below.

## 465 **Changes in mental health due to changes in pandemic** 466 **intensity and restrictions**

467           We expected that pandemic-related health protection measures, in particular  
468 confinement and quarantine, should have a negative effect on child and adolescent mental  
469 health. Consequently, a reduction in restrictions over the course of the pandemic should be  
470 associated with decreasing symptoms of poor mental health.

471           Not all reviewed studies assessing the changes in mental health indicators and  
472 symptoms over the course of the pandemic support this hypothesis. Nonetheless, more  
473 findings are in favour of a decrease of symptoms after a lift of restrictions ( $n = 9$ ) than of no  
474 change in symptoms ( $n = 8$ ) or an increase in symptoms ( $n = 2$ ).

475           This conclusion is in line with data from the newest wave of one of the studies  
476 reviewed here by Ravens-Sieberer et al. (2022) [103]. This German study shows that levels  
477 of low health-related quality of life and internalising symptoms in autumn 2021 were still  
478 higher than pre-pandemic levels. However, health-related quality of life and mental health  
479 improved from spring 2020 and winter 2020/21 to autumn 2021. The authors explain this  
480 effect by lower infection rates, higher vaccination rates, and loosening of restrictions.

481           Reasons for the negative effect of quarantine, confinement, and lockdown on child  
482 and adolescent mental health are diverse. For example, Mohler-Kuo et al. (2021) [104] found  
483 in their survey on stress factors during lockdown in Switzerland that the most common  
484 sources for stress during lockdown were the disruption of social life, the break-down of  
485 normal routines, the cancellation of important plans and events, and the uncertainty and  
486 unpredictability of the duration of the pandemic aside from distressing news coverage and  
487 rapidly changing recommendations as well as the fear of infection and the pandemic itself.  
488 Overall, it must be considered, that protection measures usually correlate highly with  
489 pandemic intensity and infection rates. Contrary, restrictions are usually lifted when infection  
490 rates ease. Thus, a unique contribution of the lifting of containment measures independent  
491 from infection rates can not be assumed [105].

## 492 **Changes of mental health related to individual risk and** 493 **protective factors**

494           Overall, the included studies suggest low socio-economic status, financial worries,  
495 material hardship, lack of space, negative home-schooling experience, bad physical health,  
496 and the diagnosis of a neurodevelopmental disorder as key risk factors for experiencing  
497 stronger negative mental health effects due to the pandemic (see Table 5 for detailed  
498 references).

499           There was also evidence that some children and adolescents that were less likely  
500 than their healthy peers to display an increase in psychopathological distress and symptom  
501 levels in response to the onset of the pandemic. These children and adolescents are  
502 reported to have experienced constant high levels of psychological distress, before and  
503 during the pandemic, due to early childhood stress, maltreatment experiences, certain  
504 chronic mental health problems, special needs, and socio-economic disadvantage  
505 [37,51,60,62]. Their psychological distress was also mostly unrelated with the changing  
506 infection rates and health protection measures. This means that they did not profit from the  
507 lifting of restrictions or the easing of the pandemic situation as their same-aged peers did.

508 This is a rather unexpected finding in the light of previous research, as some of these  
509 factors, such as prior traumatic experiences or dependency on special psychological  
510 support, have been previously proposed to enhance the risk of experiencing negative mental  
511 health effects in the face of a disaster [22,100,106].

512 We further investigated age effects by grouping the reviewed studies by age of the  
513 participants (see Table 4 for detailed references). Most evidence for an increase in mental  
514 health problems (59 supportive vs. 50 non-supportive findings) and decrease of positive  
515 mental health indicators (14 supportive findings vs. four non-supportive findings) was  
516 reported for the age group of adolescents (i.e., individuals approximately 12 to 18 years of  
517 age). In this age group strong and convincing support for an increase in depressive (17  
518 supportive findings vs. nine non-supportive findings) and anxiety symptoms (13 supportive  
519 vs. seven non-supportive findings), and a decrease in quality of life and well-being (eight  
520 supportive findings vs. two non-supportive findings) was found.

521 A general trend of increasing psychopathological distress and symptoms could also  
522 be found in school-aged children (i.e., individuals approximately six to 12 years of age) with  
523 37 studies reporting an increase in mental health problems, 22 not finding a change in  
524 symptoms, and 17 reporting a decrease in negative mental health indicators. In contrast to  
525 adolescents, no clear evidence for an increase in depressive and anxiety symptoms were  
526 found in this younger age group.

527 Hence, adolescents might have suffered more strongly from reduced contact to peers  
528 and from heightened demands for personal responsibility (e.g., self-directed learning).  
529 Additionally, literature on the psychological development in childhood and adolescence has  
530 stated that adolescents are more vulnerable to social stressors, such as isolation and  
531 loneliness [107] and that symptoms of affective disorders rise significantly in adolescence  
532 [108,109]. This age-related difference might also be partially due to the increasing  
533 introspective ability of adolescents that allows them to report more reliably on internalising  
534 symptoms than children. Another reason might be that parent-reports, typically associated

535 with an underreporting of internalising symptoms, were used for children but not for  
536 adolescents.

537         Concerning younger children (i.e., individuals approximately under six years of age),  
538 most studies does not indicate a change in psychopathological distress and symptoms (11  
539 supportive vs. eight non-supportive findings). However, this age group is severely under-  
540 investigated, and the reliability and validity of results might be limited due to difficulties in the  
541 assessment of symptoms in such young children and the mere reliance on parent- or  
542 educator-reports in this review. Therefore, it is not possible to draw clear conclusions for this  
543 age group, although it seems that it is less affected by negative mental health effects of the  
544 pandemic than older age groups.

545         Gender effects were not consistently investigated and reported in the reviewed  
546 studies. Of the 14 studies finding and reporting a significant gender effect, 11 studies  
547 identified female gender as a risk factor for higher levels and/or a stronger increase in  
548 certain indicators of poor mental health and five studies identified male gender as such a risk  
549 factor (see Table 5 for detailed references).

550         Females were reported to be at a higher risk for higher levels and/or stronger  
551 increases in internalising, anxiety, and depressive symptoms, stress, and lower levels of  
552 well-being than males. At the same time, males seem to have been more prone to attention  
553 problems, addictive gameplay, and sharper decreases in quality of life and life satisfaction  
554 than females. These gender differences were nearly exclusively found in adolescent  
555 samples.

556         Regarding socio-economic variables, children and adolescents who grow up with a  
557 single parent and those who do not have siblings were particularly at risk to show decreased  
558 levels of mental health during the pandemic. Further, housing situations providing only  
559 limited living space and no access to green spaces were associated with higher increases in  
560 and/or levels of mental distress. A low socio-economic status and financial worries of the  
561 family were also identified as an important risk factor, especially if the children did not  
562 already experience heightened psychological distress prior to the pandemic.

563 Other individual factors that acted as risk factors for mental health include poor  
564 physical health prior to the pandemic, the diagnosis of a neurodevelopmental disorder, and  
565 dysfunctional or lacking coping and emotion regulation strategies.

566 Parental strain and psychological distress, particularly in the form of parental  
567 symptoms of anxiety, depression, and substance abuse were found to be an important  
568 influential factor for child and adolescent mental health during the pandemic. Further risk  
569 factors for poor mental health in the family environment include negative parental coping  
570 strategies, dysfunctional parenting styles, and overall family stress and instability.

571 Pandemic-specific factors leading to more psychological distress were the perceived  
572 lifestyle impact of the pandemic-related policies on the one hand, and stress due to the  
573 pandemic situation on the other. The first includes negative changes in the parental job  
574 situation, the experience of isolation and loneliness, frustration and boredom, and negative  
575 experiences during home-schooling. The second comprises fears of infection with the virus  
576 concerning oneself or family and friends, general health-related concerns, and worries due  
577 to the uncertainty of the pandemic situation.

578 Behavioural factors that contributed to negative mental health outcomes were  
579 reported to be prolonged screen time, less physical exercise, disrupted sleep patterns, and  
580 mainly staying inside during times of confinement.

581 Factors that promote mental health or to mitigate negative mental health effects  
582 include access to green spaces and time spent in nature during times of confinement. Good  
583 physical health and health-related behaviours, such as regular physical exercise, a healthy  
584 diet, structured routines, and regular sleep patterns were reported to help to protect child  
585 and adolescent mental health. Children's and adolescents' positive and adaptive coping  
586 mechanisms and emotion regulation abilities as well as social support through families and  
587 friends have also been identified as protective factors. Family functioning and a positive  
588 family climate have been found to help reduce negative mental health effects.

## 589 **Reasons for inconsistencies in findings**

590           The variability in the study sample, for example, considering times and locations (i.e.,  
591 country/region) of assessment, might be a strong factor for the inconsistency of findings  
592 among the reviewed studies. Differing phases of the pandemic and locations of assessment  
593 are related to variations in infection rates and health protection measures as well as to the  
594 duration and intensity of exposure to the pandemic at the time of assessment.

595           The timing of assessments is particularly important in studies investigating changes  
596 in symptoms over the course of the pandemic. An explanation for the fact that some studies  
597 could not find a decrease in symptoms after a lift of restrictions might be that recovery takes  
598 time and therefore might not be immediately visible in the assessments. Some stressors  
599 named above, such as unpredictability of the situation and fear of infection, have most likely  
600 continued to be a burden to mental health even with lifted restrictions.

601           Further influencing factors leading to higher heterogeneity in findings might have  
602 been differences in sample characteristics (e.g., age, socio-economic status),  
603 methodological approaches, the conceptualisation of mental health problems, and the  
604 definition and operationalisation of outcome variables.

605           Another important reason for the heterogeneous findings on the effects of health  
606 protection measures might be that mental health is not only influenced by the severity of  
607 protection measures but also associated with other characteristics of the pandemic (e.g.,  
608 infection rates, death tolls). It is difficult to distinguish the effects of the intensity of protection  
609 measures from those of the severity of infection rates and the perceived pandemic threat.  
610 For example, one of the reviewed studies comparing mental health effects between three  
611 European countries showed a higher increase of mental health problems in those countries  
612 with stricter restrictions, which, however, also were the countries with higher infection and  
613 death rates at the time [34].

614           In fact, it has been proven that both policy stringency and pandemic intensity affect  
615 mental health to a similar degree [105]. This means that minimising transmission of the virus

616 and death rates by potentially stricter health protection measures might indeed be protective  
617 against negative mental health effects due to the pandemic's intensity.

618 It seems more appropriate to use separate measures for distinct symptom categories  
619 (e.g., depressive symptoms, psychosomatic symptoms) than global measures (e.g.,  
620 internalising symptoms), as the latter might be less suited to accurately capture a change in  
621 single symptoms. The same explanation can be used to explain the heterogeneous findings  
622 for complex symptom groups (e.g., anxiety) that comprise many different forms of a  
623 syndrome (e.g., generalised anxiety, health-related anxiety, school-related anxiety) that  
624 might have developed differently during the pandemic (see e.g., 93).

625 Furthermore, there is evidence for the existence of age-related differences in the  
626 change of mental health symptoms due to the pandemic. For instance, it seems that  
627 adolescents have experienced an increase in anxiety symptoms while children have not.  
628 Summing up these different effects in the total study sample might have contributed to the  
629 heterogeneity of findings.

## 630 **Strengths and limitations of the current review**

631 To our knowledge our review is the first which only includes studies with multiple  
632 assessment waves, which allows for the detection of changes in mental health which can be  
633 clearly attributed to the COVID-19-pandemic. This is a huge advantage in comparison to  
634 previous papers which mainly relied on cross-sectional estimations of the prevalence of  
635 certain mental health indicators.

636 Furthermore, this review does not only include studies conducted in the early months  
637 but comprises research assessing mental health over the first one and a half years of the  
638 pandemic. Therefore, conclusions drawn from this work are not restricted to the initial  
639 outbreak and beginning of the pandemic but are suited to estimate more long-term effects.

640 Additionally, the large study sample size and the inclusion of data from 21 countries  
641 in four continents allows for a higher generalisability of results.



642           There is potential for errors in the study selection as the identified studies were  
643 assessed for eligibility, selected, and synthesised by only one researcher. Another reason  
644 for possible distortion in data might have been effects of the publication bias due to, for  
645 example, the under-publication of non-significant results (“file drawer problem”, see e.g.,  
646 110,111). This review only included published and peer-reviewed articles and did not  
647 attempt to search for unpublished articles to ensure the scientific quality of studies. However,  
648 there is a chance that the results reviewed here therefore represent a biased sample of  
649 relevant data.

650           The conclusions drawn in this paper are most representative of western, educated,  
651 industrialised, rich, and democratic societies (WEIRD-bias, see e.g., 112) as most studies  
652 were conducted in Northern American and Western European countries. In the face of a  
653 global pandemic which has most likely affected socially and economically disadvantaged  
654 groups the most, this is a serious limitation to this review. Most of the studies in the sample  
655 concentrated on the first months of the pandemic, i.e., March to June 2020.

656           Furthermore, two-thirds of all included studies were conducted during stricter  
657 confinement rules. Due to this lack of studies conducted after summer 2020 and outside  
658 heightened restrictions, long-term effects of the pandemic situation, which lasted way longer  
659 after this first initial period, are not completely evaluable.

660           The sample is most representative of early adolescent years and does not allow for  
661 clear statements about effects on younger age groups, especially about early  
662 childhood. Lastly, the large heterogeneity of time and location of assessment, of current  
663 pandemic severity and protection measures at the time of assessment, of methodological  
664 approaches (e.g., over 60 different assessment tools were used), and of studied age groups,  
665 outcomes, and covariates makes it difficult to draw coherent conclusions.

666           A major limitation of this literature review is that all included studies rely only on  
667 assessments of mental health via child or adolescent self-, caretaker-, or teacher-reports on  
668 questionnaires which were presented online in most cases. None of the included studies  
669 used clinical evaluations by mental health professionals (e.g., diagnostic interviews), which

670 would be necessary to form solid clinical diagnoses [113]. Consequently, the trends  
671 observed in this study do not allow for conclusions about the change of the prevalence of  
672 diagnoses but are rather suited to estimate changes in the frequency of mostly self- or  
673 parent-reported symptoms. Moreover, the lack of studies using multiple informants to report  
674 on a child's or adolescent's mental health limits the validity of results.

675 The methodological quality of the reviewed studies was neither assessed nor  
676 accounted for. Effect sizes of findings were not analysed. This reduces the options for  
677 summarising the findings to the qualitative method of vote-counting which is substantially  
678 inferior to quantitative statistical methods of synthesising research findings. Hence, the  
679 purpose of this paper should be seen in an accumulation and summary of the research  
680 currently available and an indication of general directions of changes in child and adolescent  
681 mental health due to the COVID-19 pandemic.

## 682 **Implications for intervention strategies to meet mental** 683 **health needs of children and adolescents**

684 This paper shows that children's and adolescents' psychological distress and  
685 symptoms of mental health disorders increased from before to during the pandemic. Missed  
686 chances and milestones of development and the delay in diagnosis and treatment will have  
687 long-term mental health consequences. Consequently, it is obvious that the need for  
688 psychological care for children and adolescents has risen and is still rising worldwide. The  
689 situation of mental health care has already been precarious before the pandemic. It has now  
690 become even more painfully evident that there is a great dissonance between the demand  
691 for and the availability of mental health care in many places worldwide. Therefore, it is  
692 important to invest in research into, creation, and implementation of intervention strategies to  
693 react to this growing need of psychological care.

694 Furthermore, this review has shown that it is important to find a balance between  
695 health protection and infection control measures on the one side, and the protection and  
696 guarantee of the societal participation of children and adolescents on the other.

697 In general, continuity and stability of access to school, mental and physical health  
698 care, and social services are essential for children's and adolescents' mental health. Further  
699 disruptions should be avoided at all costs. Decisions about the implementation of certain  
700 interventions should always be based on expertise and empirical research to allow for  
701 efficiency in both the prevention of infections and protection of children's and adolescents'  
702 mental well-being

## 703 **Implications for further research**

704 There is a continued need for preferably longitudinal studies examining the long-term  
705 effects of the prolonged pandemic situation on child and adolescent mental health, as  
706 studies investigating mental health effects on the pandemic in its later stages are lacking.

707 It has become evident in the current paper that there is need for more longitudinal or  
708 repeated cross-sectional studies investigating the changes in certain symptom categories,  
709 as there were not enough studies identified to draw cohesive conclusions about the  
710 development of these symptoms. These categories include psychosomatic, post-traumatic  
711 stress, and compulsive symptoms, symptoms of substance abuse and addiction as well as  
712 symptoms of behavioural addiction to electronic media.

713 The current paper focusses on the COVID-19-pandemic's mental health effects on  
714 community samples of children and adolescents. While this helps the generalisability of  
715 findings, it does not allow conclusions about the pandemic's effects on special vulnerable  
716 groups. This includes children belonging to marginalised ethnic, religious, or social groups,  
717 children of frontline workers, children and adolescents growing up in low-income families,  
718 and children and adolescents suffering from chronic physical or mental health conditions,  
719 such as neurodevelopmental disorders. There is evidence that these groups of children and  
720 adolescents have been more strongly affected by the pandemic's effects than the general  
721 population [114–117].

722 Lastly, it is important to point out that further research into the COVID-19 pandemic's  
723 mental health effects and into strategies for the mitigation of negative outcomes is important

724 far beyond the current health crisis. There is a causal link between climate change and an  
725 increase in the frequency of pandemic outbreaks (e.g., 118,119). This means that if we fail to  
726 appropriately react and fight against the current climate crisis, we will have to prepare  
727 ourselves for future pandemics. Therefore, it is important and urgent to analyse the effects of  
728 the current pandemic in depth and to plan and prepare future actions accordingly based on  
729 facts and empirical evidence.

## 730 **Conclusion**

731 This systematic review of 69 longitudinal and repeated cross-sectional studies has  
732 demonstrated that psychopathological distress and symptoms in children and adolescents  
733 have increased globally in the first 17 months of the COVID-19 pandemic compared to pre-  
734 pandemic data.

735 The psychological distress of children and adolescents has been shown to be  
736 positively associated with both the intensity of the pandemic situation (e.g., infection rates,  
737 death tolls) and the severity of protection measures, such as confinement and quarantine.

738 Among many other factors, female gender, adolescent age, socio-economic  
739 disadvantage, parental psychopathology, dysfunctional family environment, social isolation  
740 and loneliness, loss of routines and structure, and the experience of distressing emotions  
741 due to health-related worries and uncertainty of the pandemic situation have been identified  
742 to increase the chances to suffer negative mental health consequences.

743 Future research is needed to extend the current findings with assessments of the  
744 long-term effects of pandemic exposure and of the changes in clinical diagnoses. This is  
745 necessary to estimate the increased need for child and adolescent mental health care more  
746 concretely. The protection of children's and adolescents' mental health must be prioritised at  
747 all costs in a crisis like the COVID-19 pandemic to prevent life-long harm to future  
748 generations.

## 749 Other Information

750 This paper was not registered and no protocol was prepared. The authors received  
751 no specific funding for this work. The authors have declared that no competing interests  
752 exist. All relevant data are within the manuscript and its supporting information files.

## 753 References

- 754 [1] World Health Organization. WHO announces COVID-19 outbreak a pandemic [Internet].  
755 World Health Organization; 2020 [cited 2021 Oct 23]. Available from:  
756 [https://www.euro.who.int/en/health-topics/health-emergencies/coronavirus-covid-](https://www.euro.who.int/en/health-topics/health-emergencies/coronavirus-covid-19/news/news/2020/3/who-announces-covid-19-outbreak-a-pandemic)  
757 [19/news/news/2020/3/who-announces-covid-19-outbreak-a-pandemic](https://www.euro.who.int/en/health-topics/health-emergencies/coronavirus-covid-19/news/news/2020/3/who-announces-covid-19-outbreak-a-pandemic).
- 758 [2] Fitzgerald DA, Nunn K, Isaacs D. What we have learnt about trauma, loss and grief for  
759 children in response to COVID-19. *Paediatr Respir Rev* 2021;39:16–21. PubMed  
760 PMID: 34229965; PubMed Central PMCID: PMC8437675.
- 761 [3] Fegert JM, Vitiello B, Plener PL, Clemens V. Challenges and burden of the Coronavirus  
762 2019 (COVID-19) pandemic for child and adolescent mental health: a narrative review  
763 to highlight clinical and research needs in the acute phase and the long return to  
764 normality. *Child and adolescent psychiatry and mental health* 2020;14(1):1–11.
- 765 [4] Solerdelcoll M, Arango C, Sugranyes G. Calling for the integration of children's mental  
766 health and protection into COVID-19 responses. *Rev Psiquiatr Salud Ment (Engl Ed)*  
767 2021;14(2):113–6. PubMed PMID: 33639299; PubMed Central PMCID: PMC7903896.
- 768 [5] Haig-Ferguson A, Cooper K, Cartwright E, Loades ME, Daniels J. Practitioner review:  
769 health anxiety in children and young people in the context of the COVID-19 pandemic.  
770 *Behav. Cogn. Psychother.* 2021;49(2):129–43. PubMed PMID: 32829718; PubMed  
771 Central PMCID: PMC7503041.
- 772 [6] Meade J. Mental Health Effects of the COVID-19 Pandemic on Children and  
773 Adolescents: A Review of the Current Research. *Pediatr Clin North Am*  
774 2021;68(5):945–59. PubMed PMID: 34538305; PubMed Central PMCID: PMC8445752.

- 775 [7] YoungMinds. Covid Impact On Young People With Mental Health Needs [Internet];  
776 2021 [cited 2021 Oct 31]. Available from: [https://www.youngminds.org.uk/about-](https://www.youngminds.org.uk/about-us/reports-and-impact/coronavirus-impact-on-young-people-with-mental-health-needs/)  
777 [us/reports-and-impact/coronavirus-impact-on-young-people-with-mental-health-needs/](https://www.youngminds.org.uk/about-us/reports-and-impact/coronavirus-impact-on-young-people-with-mental-health-needs/).
- 778 [8] Sserwanja Q, Kawuki J, Kim JH. Increased child abuse in Uganda amidst COVID-19  
779 pandemic. *J Paediatr Child Health* 2021;57(2):188–91. PubMed PMID: 33296120.
- 780 [9] Haleemunnissa S, Didel S, Swami MK, Singh K, Vyas V. Children and COVID19:  
781 Understanding impact on the growth trajectory of an evolving generation. *Child Youth*  
782 *Serv Rev* 2021;120.
- 783 [10] World Health Organization. Considering the impact of COVID-19 on children [Internet];  
784 2022 [cited 2022 Jun 23]. Available from:  
785 <https://www.who.int/europe/activities/considering-the-impact-of-covid-19-on-children>.
- 786 [11] Hussong AM, Benner AD, Erdem G, Lansford JE, Makila LM, Petrie RC, et al.  
787 Adolescence Amid a Pandemic: Short- and Long-Term Implications. *J Res Adolesc*  
788 2021;31(3):820–35.
- 789 [12] Bhatia A, Fabbri C, Cerna-Turoff I, Turner E, Lokot M, Warri A, et al. Violence against  
790 children during the COVID-19 pandemic. *Bull World Health Organ* 2021;99(10):730–8.  
791 PubMed PMID: 34621091; PubMed Central PMCID: PMC8477433.
- 792 [13] Hoffman JA, Miller EA. Addressing the Consequences of School Closure Due to  
793 COVID-19 on Children's Physical and Mental Well-Being. *WORLD MEDICAL &*  
794 *HEALTH POLICY* 2020;12(3):300–10.
- 795 [14] Foulkes L, Blakemore S-J. Individual differences in adolescent mental health during  
796 COVID-19: The importance of peer relationship quality. *Neuron* 2021;109(20):3203–5.  
797 PubMed PMID: 34380017; PubMed Central PMCID: PMC8527591.
- 798 [15] Santomauro DF, Mantilla Herrera AM, Shadid J, Zheng P, Ashbaugh C, Pigott DM, et  
799 al. Global prevalence and burden of depressive and anxiety disorders in 204 countries  
800 and territories in 2020 due to the COVID-19 pandemic. *The Lancet*  
801 2021;398(10312):1700–12.

- 802 [16] Pfefferbaum B. Challenges for Child Mental Health Raised by School Closure and  
803 Home Confinement During the COVID-19 Pandemic. *Curr Psychiatry Rep*  
804 2021;23(10):65. PubMed PMID: 34398310; PubMed Central PMCID: PMC8366164.
- 805 [17] Panchal U, Salazar de Pablo G, Franco M, Moreno C, Parellada M, Arango C, et al. The  
806 impact of COVID-19 lockdown on child and adolescent mental health: systematic  
807 review. *Eur Child Adolesc Psychiatry* 2021;1–27. PubMed PMID: 34406494; PubMed  
808 Central PMCID: PMC8371430.
- 809 [18] Meherali S, Punjani N, Louie-Poon S, Abdul Rahim K, Das JK, Salam RA, et al. Mental  
810 Health of Children and Adolescents Amidst COVID-19 and Past Pandemics: A Rapid  
811 Systematic Review. *International Journal of Environmental Research and Public Health*  
812 2021;18(7). PubMed PMID: 33810225; PubMed Central PMCID: PMC8038056.
- 813 [19] Nearchou F, Flinn C, Niland R, Subramaniam SS, Hennessy E. Exploring the Impact of  
814 COVID-19 on Mental Health Outcomes in Children and Adolescents: A Systematic  
815 Review. *International Journal of Environmental Research and Public Health*  
816 2020;17(22):8479. PubMed PMID: 33207689; PubMed Central PMCID: PMC7698263.
- 817 [20] Racine N, McArthur BA, Cooke JE, Eirich R, Zhu J, Madigan S. Global Prevalence of  
818 Depressive and Anxiety Symptoms in Children and Adolescents During COVID-19: A  
819 Meta-analysis. *JAMA Pediatr* 2021. PubMed PMID: 34369987; PubMed Central PMCID:  
820 PMC8353576.
- 821 [21] Panda PK, Gupta J, Chowdhury SR, Kumar R, Meena AK, Madaan P, et al.  
822 Psychological and Behavioral Impact of Lockdown and Quarantine Measures for  
823 COVID-19 Pandemic on Children, Adolescents and Caregivers: A Systematic Review  
824 and Meta-Analysis. *J Trop Pediatr* 2021;67(1). PubMed PMID: 33367907; PubMed  
825 Central PMCID: PMC7798512.
- 826 [22] Ma L, Mazidi M, Li K, Li Y, Chen S, Kirwan R, et al. Prevalence of mental health  
827 problems among children and adolescents during the COVID-19 pandemic: A  
828 systematic review and meta-analysis. *Journal of Affective Disorders* 2021;293:78–89.  
829 PubMed PMID: 34174475.

- 830 [23] Sun Y, Wu Y, Bonardi O, Krishnan A, He C, Boruff JT, et al. Comparison of Mental  
831 Health Symptoms prior to and during COVID-19: Evidence from a Living Systematic  
832 Review and Meta-analysis; 2021.
- 833 [24] Robinson E, Sutin AR, Daly M, Jones A. A systematic review and meta-analysis of  
834 longitudinal cohort studies comparing mental health before versus during the COVID-19  
835 pandemic in 2020. *J Affect Disord* 2022;296:567–76. PubMed PMID: 34600966;  
836 PubMed Central PMCID: PMC8578001.
- 837 [25] Prati G, Mancini AD. The psychological impact of COVID-19 pandemic lockdowns: a  
838 review and meta-analysis of longitudinal studies and natural experiments. *Psychological  
839 Medicine* 2021;51(2):201–11. PubMed PMID: 33436130; PubMed Central PMCID:  
840 PMC7844215.
- 841 [26] Page MJ, McKenzie JE, Bossuyt PM, Boutron I, Hoffmann TC, Mulrow CD, et al. The  
842 PRISMA 2020 statement: an updated guideline for reporting systematic reviews. *BMJ*  
843 2021;372:n71. PubMed PMID: 33782057; PubMed Central PMCID: PMC8005924.
- 844 [27] Pelham WE, III, Tapert SF, Gonzalez MR, McCabe CJ, Lisdahl KM, Alzueta E, et al.  
845 Early adolescent substance use before and during the COVID-19 pandemic: A  
846 longitudinal survey in the ABCD study cohort. *J Adolesc Health* 2021;69(3):390–7.
- 847 [28] Ravens-Sieberer U, Kaman A, Erhart M, Otto C, Devine J, Löffler C, et al. Quality of life  
848 and mental health in children and adolescents during the first year of the COVID-19  
849 pandemic: results of a two-wave nationwide population-based study. *Eur Child Adolesc  
850 Psychiatry* 2021:1–14. PubMed PMID: 34636964; PubMed Central PMCID:  
851 PMC8506100.
- 852 [29] Breaux R, Dvorsky MR, Marsh NP, Green CD, Cash AR, Shroff DM, et al. Prospective  
853 impact of COVID-19 on mental health functioning in adolescents with and without  
854 ADHD: Protective role of emotion regulation abilities. *J Child Psychol Psychiatry*  
855 2021;62(9):1132–9.
- 856 [30] Essler S, Christner N, Paulus M. Longitudinal Relations Between Parental Strain,  
857 Parent-Child Relationship Quality, and Child Well-Being During the Unfolding COVID-19



- 858 Pandemic. *Child Psychiatry Hum Dev* 2021;52(6):995–1011. PubMed PMID: 34426893;
- 859 PubMed Central PMCID: PMC8382101.
- 860 [31] Fung XC, Siu AM, Potenza MN, O'Brien KS, Latner JD, Chen CY, et al. Problematic
- 861 Use of Internet-Related Activities and Perceived Weight Stigma in Schoolchildren: A
- 862 Longitudinal Study Across Different Epidemic Periods of COVID-19 in China.
- 863 *FRONTIERS IN PSYCHIATRY* 2021;12.
- 864 [32] Giménez-Dasí M, Quintanilla L, Fernandez-Sanchez M. Longitudinal Effects of the
- 865 Pandemic and Confinement on the Anxiety Levels of a Sample of Spanish Children in
- 866 Primary Education. *International Journal of Environmental Research and Public Health*
- 867 2021;18(24).
- 868 [33] Liang Z, Mazzeschi C, Delvecchio E. The Impact of Parental Stress on Italian
- 869 Adolescents' Internalizing Symptoms during the COVID-19 Pandemic: A Longitudinal
- 870 Study. *International Journal of Environmental Research and Public Health* 2021;18(15).
- 871 PubMed PMID: 34360369; PubMed Central PMCID: PMC8345594.
- 872 [34] Orgilés M, Francisco R, Delvecchio E, Espada JP, Mazzeschi C, Pedro M, et al.
- 873 Psychological Symptoms in Italian, Spanish and Portuguese Youth During the COVID-
- 874 19 Health Crisis: A Longitudinal Study. *Child Psychiatry Hum Dev* 2021.
- 875 [35] Raw JAL, Waite P, Pearcey S, Shum A, Patalay P, Creswell C. Examining changes in
- 876 parent-reported child and adolescent mental health throughout the UK's first COVID-19
- 877 national lockdown. *J Child Psychol Psychiatry* 2021;62(12):1391–401. PubMed
- 878 PMID: 34327726; PubMed Central PMCID: PMC8447308.
- 879 [36] Rosen ML, Rodman AM, Kasperek SW, Mayes M, Freeman MM, Lengua LJ, et al.
- 880 Promoting youth mental health during the COVID-19 pandemic: A longitudinal study.
- 881 *PLoS One* 2021;16(8):e0255294. PubMed PMID: 34379656; PubMed Central PMCID:
- 882 PMC8357139.
- 883 [37] Shum A, Skripkauskaitė S, Pearcey S, Waite P, Creswell C, McCall A. Children and
- 884 adolescents' mental health: One year in the pandemic (Report 10): OSF; 2021.

- 885 [38] Skripkauskaite S, Shum A, Pearcey S, McCall A, Waite P, Creswell C. Changes in  
886 children's mental health symptoms from March 2020 to June 2021 (Report 11) 2021.
- 887 [39] Saito M, Kikuchi Y, Lefor AK, Hoshina M. Mental health in Japanese children during  
888 school closures due to the COVID-19. *Pediatr Int* 2021.
- 889 [40] Borbás R, Fehlbaum LV, Dimanova P, Negri A, Arudchelvam J, Schnider CB, et al.  
890 Mental well-being during the first months of Covid-19 in adults and children: behavioral  
891 evidence and neural precursors. *Sci Rep* 2021;11(1):17595. PubMed PMID: 34475457;  
892 PubMed Central PMCID: PMC8413346.
- 893 [41] Achterberg M, Dobbelaar S, Boer OD, Crone EA. Perceived stress as mediator for  
894 longitudinal effects of the COVID-19 lockdown on wellbeing of parents and children. *Sci*  
895 *Rep* 2021;11(1):2971. PubMed PMID: 33536464; PubMed Central PMCID:  
896 PMC7859207.
- 897 [42] Aleksandrov D, Okhrimenko I. Psychological Risk Factors of the Neurotization of  
898 Adolescents under the Conditions of Quarantine Measures of the COVID-19 Epidemic.  
899 BRAIN-BROAD RESEARCH IN ARTIFICIAL INTELLIGENCE AND NEUROSCIENCE  
900 2020;11(2):29–36.
- 901 [43] Alt P, Reim J, Walper S. Fall from grace: Increased loneliness and depressiveness  
902 among extraverted youth during the German COVID-19 lockdown. *J Res Adolesc*  
903 2021;31(3):678–91.
- 904 [44] Bélanger RE, Patte KA, Leatherdale ST, Gansaonré RJ, Haddad S. An Impact Analysis  
905 of the Early Months of the COVID-19 Pandemic on Mental Health in a Prospective  
906 Cohort of Canadian Adolescents. *J Adolesc Health* 2021;69(6):917–24. PubMed  
907 PMID: 34565667; PubMed Central PMCID: PMC8457891.
- 908 [45] Bernasco EL, Nelemans SA, Graaff J, Branje S. Friend support and internalizing  
909 symptoms in early adolescence during COVID-19. *J Res Adolesc* 2021;31(3):692–702.
- 910 [46] Bignardi G, Dalmaijer ES, Anwyl-Irvine AL, Smith TA, Siugzdaite R, Uh S, et al.  
911 Longitudinal increases in childhood depression symptoms during the COVID-19  
912 lockdown. *Arch Dis Child* 2021;106(8):791–7.

- 913 [47] Browne DT, Wade M, May SS, Maguire N, Wise D, Estey K, et al. Children's Mental  
914 Health Problems During the Initial Emergence of COVID-19. CANADIAN  
915 PSYCHOLOGY-PSYCHOLOGIE CANADIENNE 2021;62(1):65–72.
- 916 [48] Chaffee BW, Cheng J, Couch ET, Hoeft KS, Halpern-Felsher B. Adolescents'  
917 Substance Use and Physical Activity Before and During the COVID-19 Pandemic.  
918 JAMA Pediatr 2021;175(7):715–22.
- 919 [49] Chen IH, Chen CY, Pakpour AH, Griffiths MD, Lin CY, Li XD, et al. Problematic internet-  
920 related behaviors mediate the associations between levels of internet engagement and  
921 distress among schoolchildren during COVID-19 lockdown: A longitudinal structural  
922 equation modeling study. JOURNAL OF BEHAVIORAL ADDICTIONS 2021;10(1):135–  
923 48.
- 924 [50] Chen Y, Osika W, Henriksson G, Dahlstrand J, Friberg P. Impact of COVID-19  
925 pandemic on mental health and health behaviors in Swedish adolescents. Scand J  
926 Public Health 2021.
- 927 [51] Cohen ZP, Cosgrove KT, DeVille DC, Akeman E, Singh MK, White E, et al. The Impact  
928 of COVID-19 on Adolescent Mental Health: Preliminary Findings From a Longitudinal  
929 Sample of Healthy and At-Risk Adolescents. Front. Pediatr. 2021;9.
- 930 [52] Daniunaite I, Truskauskaite-Kuneviciene I, Thoresen S, Zelviene P, Kazlauskas E.  
931 Adolescents amid the COVID-19 pandemic: a prospective study of psychological  
932 functioning. Child and adolescent psychiatry and mental health 2021;15(1).
- 933 [53] de France K, Hancock GR, Stack DM, Serbin LA, Hollenstein T. The mental health  
934 implications of COVID-19 for adolescents: Follow-up of a four-wave longitudinal study  
935 during the pandemic. Am Psychol 2021.
- 936 [54] Deng W, Gadassi Polack R, Creighton M, Kober H, Joormann J. Predicting negative  
937 and positive affect during COVID-19: A daily diary study in youths. J Res Adolesc  
938 2021;31(3):500–16.
- 939 [55] Ezpeleta L, Navarro JB, La Osa N de, Trepate E, Penelo E. Life Conditions during  
940 COVID-19 Lockdown and Mental Health in Spanish Adolescents. International Journal

- 941 of Environmental Research and Public Health 2020;17(19). PubMed PMID: 33036461;  
942 PubMed Central PMCID: PMC7579639.
- 943 [56] Feinberg ME, Mogle JA, Lee JK, Tornello SL, Hostetler ML, Cifelli JA, et al. Impact of  
944 the COVID-19 Pandemic on Parent, Child, and Family Functioning. *Fam Process* 2021.
- 945 [57] Genta FD, Rodrigues Neto GB, Sunfeld JPV, Porto JF, Xavier AD, Moreno CRC, et al.  
946 COVID-19 pandemic impact on sleep habits, chronotype, and health-related quality of  
947 life among high school students: a longitudinal study. *J Clin Sleep Med*  
948 2021;17(7):1371–7. PubMed PMID: 33666168; PubMed Central PMCID: PMC8314620.
- 949 [58] Giménez-Dasí M, Quintanilla L, Lucas-Molina B, Sarmiento-Henrique R. Six Weeks of  
950 Confinement: Psychological Effects on a Sample of Children in Early Childhood and  
951 Primary Education. *Front. Psychol.* 2020;11.
- 952 [59] Gladstone TR, Schwartz JA, Possel P, am Richer, Buchholz KR, Rintell LS. Depressive  
953 Symptoms Among Adolescents: Testing Vulnerability-Stress and Protective Models in  
954 the Context of COVID-19. *Child Psychiatry Hum Dev* 2021.
- 955 [60] Hafstad GS, Saetren SS, Wentzel-Larsen T, Augusti EM. Adolescents' symptoms of  
956 anxiety and depression before and during the Covid-19 outbreak - A prospective  
957 population-based study of teenagers in Norway. *LANCET REGIONAL HEALTH-  
958 EUROPE* 2021;5.
- 959 [61] Hollenstein T, Colasante T, Loughheed JP. Adolescent and maternal anxiety symptoms  
960 decreased but depressive symptoms increased before to during COVID-19 lockdown. *J  
961 Res Adolesc* 2021;31(3):517–30.
- 962 [62] Hu Y, Qian Y. COVID-19 and adolescent mental health in the United Kingdom. *J  
963 Adolesc Health* 2021;69(1):26–32.
- 964 [63] Hussong AM, Midgette AJ, Thomas TE, Coffman JL, Cho S. Coping and mental health  
965 in early adolescence during COVID-19. *Research on Child and Adolescent  
966 Psychopathology* 2021;49(9):1113–23.

- 967 [64] Hyunshik K, Ma JM, Sunkyoung L, Gu Y. Change in Japanese children's 24-hour  
968 movement guidelines and mental health during the COVID-19 pandemic. *Sci Rep*  
969 2021;11(1).
- 970 [65] Jiang HQ, Yu WL, Lin DH, Macnamara BN. Resilience of adolescents, though  
971 weakened during pandemic-related lockdown, serves as a protection against  
972 depression and sleep problems. *PSYCHOLOGY HEALTH & MEDICINE* 2021.
- 973 [66] Larsen L, Helland MS, Holt T. The impact of school closure and social isolation on  
974 children in vulnerable families during COVID-19: a focus on children's reactions. *Eur*  
975 *Child Adolesc Psychiatry* 2021;2021.
- 976 [67] Liao SJ, Luo BR, Liu HM, Zhao L, Shi W, Lei YL, et al. Bilateral associations between  
977 sleep duration and depressive symptoms among Chinese adolescents before and  
978 during the COVID-19 pandemic. *Sleep Med* 2021;84:289–93.
- 979 [68] Mastorci F, Piaggi P, Doveri C, Trivellini G, Casu A, Pozzi M, et al. Health-Related  
980 Quality of Life in Italian Adolescents During Covid-19 Outbreak. *Front. Pediatr.* 2021;9.
- 981 [69] O'Kane SM, Lahart IM, Gallagher AM, Carlin A, Faulkner M, Jago R, et al. Changes in  
982 Physical Activity, Sleep, Mental Health, and Social Media Use During COVID-19  
983 Lockdown Among Adolescent Girls: A Mixed-Methods Study. *JOURNAL OF PHYSICAL*  
984 *ACTIVITY & HEALTH* 2021;18(6):677–85.
- 985 [70] Paschke K, Arnaud N, Austermann MI, Thomasius R. Risk factors for prospective  
986 increase in psychological stress during COVID-19 lockdown in a representative sample  
987 of adolescents and their parents. *BJPsych Open* 2021;7.
- 988 [71] Penner F, Hernandez Ortiz J, Sharp C. Change in youth mental health during the  
989 COVID-19 pandemic in a majority Hispanic/Latinx US sample. *Journal of the American*  
990 *Academy of Child & Adolescent Psychiatry* 2021;60(4):513–23.
- 991 [72] Qin J, Ding YY, Gao J, Wu Y, Lv H, Wu J. Effects of COVID-19 on Mental Health and  
992 Anxiety of Adolescents Aged 13-16 Years: A Comparative Analysis of Longitudinal Data  
993 From China. *FRONTIERS IN PSYCHIATRY* 2021;12.

- 994 [73] Rogers AA, Ha T, Ockey S. Adolescents' perceived socio-emotional impact of COVID-  
995 19 and implications for mental health: Results from a US-based mixed-methods study. *J*  
996 *Adolesc Health* 2021;68(1):43–52.
- 997 [74] Romm KF, Park YW, Hughes JL, Gentzler AL. Risk and protective factors for changes  
998 in adolescent psychosocial adjustment during COVID-19. *J Res Adolesc*  
999 2021;31(3):546–59.
- 1000 [75] Shi W, Yuan GF, Hall BJ, Liu X, Su Y, Zhao L, et al. Mental Disorders and Emotional  
1001 Competence Among Chinese Adolescents Before and During COVID-19 Pandemic: A  
1002 Longitudinal Mediation Model. *Front Public Health* 2021;9:767004. PubMed  
1003 PMID: 34957019; PubMed Central PMCID: PMC8702639.
- 1004 [76] Shoshani A, Kor A. The Mental Health Effects of the COVID-19 Pandemic on Children  
1005 and Adolescents: Risk and Protective Factors. *Psychological Trauma: Theory,*  
1006 *Research, Practice, and Policy* 2021.
- 1007 [77] Specht IO, Rohde JF, Nielsen AK, Larsen SC, Heitmann BL. Changes in Emotional-  
1008 Behavioral Functioning Among Pre-school Children Following the Initial Stage Danish  
1009 COVID-19 Lockdown and Home Confinement. *Front. Psychol.* 2021;12.
- 1010 [78] Spencer AE, Oblath R, Dayal R, Loubeau JK, Lejeune J, Sikov J, et al. Changes in  
1011 psychosocial functioning among urban, school-age children during the COVID-19  
1012 pandemic. *Child and adolescent psychiatry and mental health* 2021;15(1).
- 1013 [79] Teng ZJ, Pontes HM, Nie Q, Griffiths MD, Guo C. Depression and anxiety symptoms  
1014 associated with internet gaming disorder before and during the COVID-19 pandemic: A  
1015 longitudinal study. *JOURNAL OF BEHAVIORAL ADDICTIONS* 2021;10(1):169–80.
- 1016 [80] van der Laan SEI, Finkenauer C, Lenters VC, van Harmelen A-L, van der Ent CK, Nijhof  
1017 SL. Gender-Specific Changes in Life Satisfaction After the COVID-19-Related  
1018 Lockdown in Dutch Adolescents: A Longitudinal Study. *J Adolesc Health*  
1019 2021;69(5):737–45. PubMed PMID: 34446346; PubMed Central PMCID: PMC8460170.
- 1020 [81] Vira EG, Skoog T. Swedish middle school students' psychosocial well-being during the  
1021 COVID-19 pandemic: A longitudinal study. *SSM-POPULATION HEALTH* 2021;16.

- 1022 [82] Walters GD, Runell L, Kremser J. Social and psychological effects of the COVID-19  
1023 pandemic on middle-school students: Attendance options and changes over time. Sch  
1024 Psychol 2021;36(5):277–84.
- 1025 [83] Wright N, Hill J, Sharp H, Pickles A. Interplay between long-term vulnerability and new  
1026 risk: Young adolescent and maternal mental health immediately before and during the  
1027 COVID-19 pandemic. JCPP Adv 2021;1(1):e12008. PubMed PMID: 34485987; PubMed  
1028 Central PMCID: PMC8206735.
- 1029 [84] Wu Z, Liu Z, Zou Z, Wang F, Zhu M, Zhang W, et al. Changes of psychotic-like  
1030 experiences and their association with anxiety/depression among young adolescents  
1031 before COVID-19 and after the lockdown in China. Schizophr Res 2021;237:40–6.  
1032 PubMed PMID: 34481204; PubMed Central PMCID: PMC8437585.
- 1033 [85] Wunsch K, Nigg C, Niessner C, Schmidt SC, Oriwol D, Hanssen-Doose A, et al. The  
1034 Impact of COVID-19 on the Interrelation of Physical Activity, Screen Time and Health-  
1035 Related Quality of Life in Children and Adolescents in Germany: Results of the Motorik-  
1036 Modul Study. CHILDREN-BASEL 2021;8(2).
- 1037 [86] Burdzovic Andreas J, Brunborg GS. Self-reported Mental and Physical Health Among  
1038 Norwegian Adolescents Before and During the COVID-19 Pandemic. JAMA Netw Open  
1039 2021;4(8):e2121934. PubMed PMID: 34427678; PubMed Central PMCID:  
1040 PMC8385591.
- 1041 [87] Dabravolskaj J, Khan MKA, Veugelers PJ, Maximova K. Mental Health and Wellbeing of  
1042 9-12-year-old Children in Northern Canada Before the COVID-19 Pandemic and After  
1043 the First Lockdown. Int J Public Health 2021;66:1604219. PubMed PMID: 34539323;  
1044 PubMed Central PMCID: PMC8441596.
- 1045 [88] Dollberg DG, Hanetz-Gamliel K, Levy S. COVID-19, child's behavior problems, and  
1046 mother's anxiety and mentalization: A mediated moderation model. CURRENT  
1047 PSYCHOLOGY 2021.
- 1048 [89] James M, Marchant E, Defeyter MA, Woodside J, Brophy S. Impact of school closures  
1049 on the health and well-being of primary school children in Wales UK: a routine data

- 1050 linkage study using the HAPPEN Survey (2018-2020). *BMJ Open*
- 1051 2021;11(10):e051574. PubMed PMID: 34625414; PubMed Central PMCID:
- 1052 PMC8503919.
- 1053 [90] Kim D, Lee J. Addictive Internet Gaming Usage among Korean Adolescents before and
- 1054 after the Outbreak of the COVID-19 Pandemic: A Comparison of the Latent Profiles in
- 1055 2018 and 2020. *International Journal of Environmental Research and Public Health*
- 1056 2021;18(14). PubMed PMID: 34299725; PubMed Central PMCID: PMC8305932.
- 1057 [91] Kim SY, Kim HR, Park B, Choi HG. Comparison of Stress and Suicide-Related
- 1058 Behaviors Among Korean Youths Before and During the COVID-19 Pandemic. *JAMA*
- 1059 *Netw Open* 2021;4(12).
- 1060 [92] Koenig J, Kohls E, Moessner M, Lustig S, Bauer S, Becker K, et al. The impact of
- 1061 COVID-19 related lockdown measures on self-reported psychopathology and health-
- 1062 related quality of life in German adolescents. *Eur Child Adolesc Psychiatry* 2021.
- 1063 [93] Lane J, Therriault D, Dupuis A, Gosselin P, Smith J, Ziam S, et al. The Impact of the
- 1064 COVID-19 Pandemic on the Anxiety of Adolescents in Quebec. *CHILD & YOUTH CARE*
- 1065 *FORUM* 2021.
- 1066 [94] Luijten MAJ, van Muilekom MM, Teela L, Polderman TJC, Terwee CB, Zijlmans J, et al.
- 1067 The impact of lockdown during the COVID-19 pandemic on mental and social health of
- 1068 children and adolescents. *Qual Life Res* 2021;30(10):2795–804. PubMed
- 1069 PMID: 33991278; PubMed Central PMCID: PMC8122188.
- 1070 [95] Thorisdottir IE, Asgeirsdottir BB, Kristjansson AL, Valdimarsdottir HB, Tolgyes EM,
- 1071 Sigfusson J, et al. Depressive symptoms, mental wellbeing, and substance use among
- 1072 adolescents before and during the COVID-19 pandemic in Iceland: a longitudinal,
- 1073 population-based study. *Lancet Psychiatry* 2021;8(8):663–72.
- 1074 [96] Wunsch K, Eckert T, Fiedler J, Cleven L, Niermann C, Reiterer H, et al. Effects of a
- 1075 Collective Family-Based Mobile Health Intervention Called "SMARTFAMILY" on
- 1076 Promoting Physical Activity and Healthy Eating: Protocol for a Randomized Controlled
- 1077 Trial. *JMIR RESEARCH PROTOCOLS* 2020;9(11).



- 1078 [97] Bonanno GA, Brewin CR, Kaniasty K, La Greca AM. Weighing the Costs of Disaster:  
1079 Consequences, Risks, and Resilience in Individuals, Families, and Communities.  
1080 Psychol Sci Public Interest 2010;11(1):1–49. PubMed PMID: 26168411.
- 1081 [98] Danzer AM, Danzer N. The Long-Term Effects of the Chernobyl Catastrophe on  
1082 Subjective Well-Being and Mental Health; 2011.
- 1083 [99] Freedy J, Kilpatrick DG, Resnick HS. Natural disasters and mental health: Theory,  
1084 assessment, and intervention; 1993.
- 1085 [100] Goldmann E, Galea S. Mental health consequences of disasters. Annu. Rev. Public  
1086 Health 2014;35(1):169–83. PubMed PMID: 24159920.
- 1087 [101] Stewart SL, Vasudeva AS, van Dyke JN, Poss JW. Child and youth mental health  
1088 needs and service utilization during COVID-19. Traumatology (Tallahass Fla) 2021.
- 1089 [102] Stewart SL, Vasudeva AS, van Dyke JN, Poss JW. Following the Epidemic Waves:  
1090 Child and Youth Mental Health Assessments in Ontario Through Multiple Pandemic  
1091 Waves. FRONTIERS IN PSYCHIATRY 2021;12.
- 1092 [103] Ravens-Sieberer U, Erhart M, Devine J, Gilbert M, Reiss F, Barkmann C, et al. Child  
1093 and Adolescent Mental Health During the COVID-19 Pandemic: Results of the Three-  
1094 Wave Longitudinal COPSY Study. J Adolesc Health 2022;71(5):570–8. PubMed  
1095 PMID: 35989235; PubMed Central PMCID: PMC9386895.
- 1096 [104] Mohler-Kuo M, Dzemaili S, Foster S, Werlen L, Walitza S. Stress and Mental Health  
1097 among Children/Adolescents, Their Parents, and Young Adults during the First COVID-  
1098 19 Lockdown in Switzerland. International Journal of Environmental Research and  
1099 Public Health 2021;18(9). PubMed PMID: 33925743; PubMed Central PMCID:  
1100 PMC8124779.
- 1101 [105] Akinin LB, Andretti B, Goldszmidt R, Helliwell JF, Petherick A, Neve J-E de, et al.  
1102 Policy stringency and mental health during the COVID-19 pandemic: a longitudinal  
1103 analysis of data from 15 countries. The Lancet Public Health 2022;7(5):e417-e426.

- 1104 [106] Osofsky JD, Osofsky HJ, Weems CF, Hansel TC, King LS. Effects of Stress Related  
1105 to the Gulf Oil Spill on Child and Adolescent Mental Health. *J Pediatr Psychol*  
1106 2016;41(1):65–72. PubMed PMID: 25306404.
- 1107 [107] Magson NR, Freeman JYA, Rapee RM, Richardson CE, Oar EL, Fardouly J. Risk  
1108 and Protective Factors for Prospective Changes in Adolescent Mental Health during the  
1109 COVID-19 Pandemic. *J Youth Adolescence* 2021;50(1):44–57. PubMed  
1110 PMID: 33108542; PubMed Central PMCID: PMC7590912.
- 1111 [108] Kessler RC, Amminger GP, Aguilar-Gaxiola S, Alonso J, Lee S, Ustün TB. Age of  
1112 onset of mental disorders: a review of recent literature. *Curr Opin Psychiatry*  
1113 2007;20(4):359–64. PubMed PMID: 17551351; PubMed Central PMCID: PMC1925038.
- 1114 [109] Kessler RC, Berglund P, Demler O, Jin R, Merikangas KR, Walters EE. Lifetime  
1115 prevalence and age-of-onset distributions of DSM-IV disorders in the National  
1116 Comorbidity Survey Replication. *Arch Gen Psychiatry* 2005;62(6):593–602. PubMed  
1117 PMID: 15939837.
- 1118 [110] Scargle JD. Publication Bias (The "File-Drawer Problem") in Scientific Inference;  
1119 1999. Available from: <https://arxiv.org/pdf/physics/9909033>.
- 1120 [111] Thornton A, Lee. P. Publication bias in meta-analysis its causes and consequences.  
1121 *Journal of Clinical Epidemiology* 2000;53(2):207–16.
- 1122 [112] Henrich J, Heine SJ, Norenzayan A. Most people are not WEIRD. *Nature*  
1123 2010;466(7302):29. PubMed PMID: 20595995.
- 1124 [113] Fristad MA, Emery BL, Beck SJ. Use and abuse of the children's depression  
1125 inventory. *Journal of Consulting and Clinical Psychology* 1997;65(4):699–702.
- 1126 [114] Aishworiya R, Kang YQ. Including Children with Developmental Disabilities in the  
1127 Equation During this COVID-19 Pandemic. *J Autism Dev Disord* 2021;51(6):2155–8.  
1128 PubMed PMID: 32816170; PubMed Central PMCID: PMC7438977.
- 1129 [115] Ghosh R, Dubey MJ, Chatterjee S, Dubey S. Impact of COVID -19 on children:  
1130 special focus on the psychosocial aspect. *Minerva Pediatr* 2020;72(3):226–35. PubMed  
1131 PMID: 32613821.

- 1132 [116] Masi A, Mendoza Diaz A, Tully L, Azim SI, Woolfenden S, Efron D, et al. Impact of  
1133 the COVID-19 pandemic on the well-being of children with neurodevelopmental  
1134 disabilities and their parents. *J Paediatr Child Health* 2021;57(5):631–6. PubMed  
1135 PMID: 33426739; PubMed Central PMCID: PMC8014782.
- 1136 [117] Shorey S, Lau LST, Tan JX, Ng ED, Aishworiya R. Families With Children With  
1137 Neurodevelopmental Disorders During COVID-19: A Scoping Review. *J Pediatr Psychol*  
1138 2021;46(5):514–25. PubMed PMID: 33758930; PubMed Central PMCID: PMC8083717.
- 1139 [118] Shehvaar De, Idris W, Ahmed M. Climate Change and the Surge for Pandemics. *JSD*  
1140 2020;13(3):138.
- 1141 [119] Estrada R, Griffith A, Prim C, Sinn J. Pandemics in a changing climate—evolving risk  
1142 and the global response: *Swiss Re*; 2016.
- 1143

## **Supporting information**

**S1 Table. Number of Studies with Data Collection Conducted in a Respective Month in the COVID-19 Pandemic.**

**S2 Table. Number of Studies Including Participants in a Respective Age Group.**

**S3 Table. Number of Studies Conducted in a Respective Country.**
